# Supplementary material for: Salivary microbiome profiling reveals a dysbiotic schizophrenia-associated microbiota
Source: PubMed Central journal article supplement (PMC8553823; doi:10.1038/s41537-021-00180-1), 2021-10-28
Supplement: 41537_2021_180_MOESM1_ESM.pdf [file 41537_2021_180_MOESM1_ESM.pdf]

# **Salivary microbiome profiling reveals a dysbiotic schizophrenia-associated microbiota**

## **Authors**

Ying Qing<sup>1</sup>; Lihua Xu<sup>2</sup>; Gaoping Cui<sup>1</sup>; Liya Sun<sup>1</sup>; Xiaowen Hu<sup>1</sup>; Xuhan Yang<sup>1</sup>; Jie Jiang<sup>1</sup>; Juan Zhang<sup>1</sup>; Tianhong Zhang<sup>2</sup>; Tao Wang<sup>3,4</sup>; Lin He<sup>1</sup>; Jijun Wang<sup>2,\*</sup>; Chunling Wan<sup>1,\*</sup>.

\* Corresponding authors: Chunling Wan and Jijun Wang.

## **Author information**

<sup>1</sup> Bio-X Institutes, Key Laboratory for the Genetics of Developmental and Neuropsychiatric Disorders, Ministry of Education, Shanghai Jiao Tong University, Shanghai, China.

<sup>2</sup> Shanghai Mental Health Centre, Shanghai Jiao Tong University School of Medicine, Shanghai Key Laboratory of Psychotic Disorders, Shanghai, China.

<sup>3</sup> Department of Bioinformatics and Biostatistics, Shanghai Jiao Tong University, Shanghai, China.

<sup>4</sup> SJTU-Yale Joint Center for Biostatistics and Data Science, Shanghai Jiao Tong University, Shanghai, China.

## **Supplementary material:**

Supplementary Notes 1-4

Supplementary Tables 1-4

Supplementary Figures 1-6

## Supplementary Notes

### Supplementary Note 1. The salivary microbiota displays stage-specific alterations in schizophrenia

Most noticeably, Proteobacteria and Firmicutes, which largely dominated the microbial communities in saliva, differed significantly following disease onset and displayed the reverse alterations in a stepwise manner from HC to CHR to FES (Figure 2b, Supplementary Table 1). Proteobacteria was gradually depleted in the FES group relative to the CHR group (10.7%) and HCs (33.4%), whereas Firmicutes was progressively enriched in the FES group compared to the CHR group (24.4%) and HCs (62.6%). Bacteroidetes, as the third most abundant phylum, manifested a unique change trend in the FES group, exhibiting depletion relative to the CHR group (23.5%) but enrichment relative to HCs (80.4%) (Figure 2b). At the genus level, the salivary microbiota was dominated by *Neisseria* and *Streptococcus* (Supplementary Figure 3a), and was mainly composed of gram-negative bacteria (Supplementary Figure 3b), but no significant difference in the ratio of gram-positive bacteria to gram-negative bacteria was observed in the FES group compare to HCs (data not shown). The results of comparative taxonomic analyses among the three groups are shown in Supplementary Table 1.

For the CHR group, the alterations in salivary bacterial abundances were greatly different from those of the FES group, compared to HCs, illustrating the stage-specific microbial changes associated with progression to schizophrenia.

**Supplementary Note 2. The ratios of Actinobacteria/Proteobacteria and Bacteroidetes/Proteobacteria are associated with the clinical characteristics of schizophrenia and the prodromal psychosis stage**

The Actinobacteria/Proteobacteria ratio was negatively related to CRP in HCs but not in the FES group (Supplementary Figure 4b). In addition, we also found that the Bacteroidetes/Proteobacteria ratio was negatively correlated with TNF $\alpha$  in the FES group rather than the HCs (Supplementary Figure 4b). Moreover, the Actinobacteria/Proteobacteria ratio was negatively correlated with thioredoxin in the FES group (Supplementary Figure 4b).

**Supplementary Note 3. The functional dysbiosis of “metabolism” in the salivary microbiome is particularly predominant in schizophrenia**

A total of 296 non-human KEGG pathways were included in the functional analysis. One hundred and eighty-one out of 296 (61.1%) KEGG pathways differed in abundance when the FES group was compared to HCs, among which 57.5% of the total differentially abundant pathways corresponded to the term “metabolism” (Figure 4a and Supplementary Table 4). In addition, there were 119 differentially abundant pathways in CHR versus HC (Supplementary Figure 5), among which 101, mainly classified as “metabolism”, overlapped between the FES and CHR groups compared to the HCs (Supplementary Figure 6), reflecting similar changes in salivary microbial metabolic functions between psychotic and pre-psychotic status. Moreover, differentially abundant KEGG pathways between CHR and HC and FES and CHR are shown in Supplementary Table 4.

#### **Supplementary Note 4. Demographic and clinical information of recruited subjects**

In total, 208 individuals from 14 to 46 years of age were included in this case-control study and categorized into 3 groups: 85 subjects with a well-established diagnosis of schizophrenia, 43 subjects at the clinical high-risk (CHR) state and 80 healthy controls (HCs). All 85 patients with schizophrenia were in their first episode and were drug-naïve, and 35 CHR subjects were anti-psychotic naïve, while the other 8 CHR subjects were treated from 2 days to 3 months (1 for 2 days, 2 for 1 week and 1 for 2/3/4 weeks and 2/3 months). All 208 subjects completed saliva collection, among which 47 FES patients and 50 HCs completed blood draw. Data of the CGI-S scores were collected on 80 FES patients, while BPRS and SANS scores on 61 FES patients and SIPS scores on 43 CHR subjects. Considering the differences in age, gender and education level among the three groups (Table 1), all statistical tests were adjusted for these confounders.

## Supplementary Tables

**Supplementary Table 1. Q-values for comparisons of median relative abundances of salivary taxa in FES, CHR and HC groups.**

| Taxa                         | Taxonomic Assignment                                                            | Relative abundance |          |          | Three groups         |                      |                      | FES vs HC            |      | CHR vs HC            |      | FES vs CHR           |      |
|------------------------------|---------------------------------------------------------------------------------|--------------------|----------|----------|----------------------|----------------------|----------------------|----------------------|------|----------------------|------|----------------------|------|
|                              |                                                                                 | FES                | CHR      | HC       | q-value <sup>1</sup> | q-value <sup>2</sup> | q-value <sup>3</sup> | q-value <sup>4</sup> | FC   | q-value <sup>4</sup> | FC   | q-value <sup>4</sup> | FC   |
| Acidobacteria                | p__Acidobacteria;                                                               | 0.000205           | 0.000144 | 0.000123 | 8.53E-03             | 1.55E-03             | 4.18E-02             | 1.85E-02             | 1.67 | 3.35E-01             | 1.17 | 9.31E-02             | 1.43 |
| Holophagae                   | p__Acidobacteria;c__Holophagae;                                                 | 4.11E-05           | 2.05E-05 | 4.11E-05 | 1.45E-01             | 9.43E-01             | 1                    | 9.22E-01             | 1.00 | 1                    | 0.50 | 1                    | 2.00 |
| Subgroup 10                  | p__Acidobacteria;c__Holophagae;o__Subgroup_10;                                  | 6.16E-05           | 2.05E-05 | 4.11E-05 | 1.48E-01             | 6.33E-01             | 1                    | 1                    | 1.50 | 1                    | 0.50 | 1                    | 3.00 |
| ABS-19                       | p__Acidobacteria;c__Holophagae;o__Subgroup_10;f__ABS-19;                        | 6.16E-05           | 2.05E-05 | 4.11E-05 | 3.88E-01             | 7.11E-01             | 1                    | 1                    | 1.50 | 1                    | 0.50 | 8.35E-01             | 3.00 |
| Subgroup 7                   | p__Acidobacteria;c__Holophagae;o__Subgroup_7;                                   | 6.16E-05           | 2.05E-05 | 4.11E-05 | 4.47E-01             | 8.32E-01             | 1                    | 9.19E-01             | 1.50 | 1                    | 0.50 | 1                    | 3.00 |
| Subgroup 22                  | p__Acidobacteria;c__Subgroup_22;                                                | 3.08E-05           | 2.05E-05 | 4.11E-05 | 3.71E-01             | 5.77E-01             | 0                    | 1                    | 0.75 | NA                   | 0.50 | NA                   | 1.50 |
| unidentified Acidobacteria   | p__Acidobacteria;c__unidentified_Acidobacteria;                                 | 0.000175           | 0.000144 | 0.000123 | 1.03E-02             | 2.28E-03             | 6.15E-03             | 4.63E-03             | 1.42 | 1.47E-01             | 1.17 | 1.89E-01             | 1.21 |
| Acidobacteriales             | p__Acidobacteria;c__unidentified_Acidobacteria;o__Acidobacteriales;             | 8.22E-05           | 8.22E-05 | 4.11E-05 | 1.93E-01             | 2.66E-01             | 2.21E-03             | 2.11E-01             | 2.00 | 6.32E-01             | 2.00 | 8.03E-01             | 1.00 |
| Acidobacteriaceae Subgroup 1 | p__Acidobacteria;c__unidentified_Acidobacteria;o__Acidobacteriaceae Subgroup 1; | 8.22E-05           | 8.22E-05 | 4.11E-05 | 1.86E-01             | 2.76E-01             | 5.27E-02             | 1.60E-01             | 2.00 | 6.17E-01             | 2.00 | 7.92E-01             | 1.00 |

|                               |                                                                                                                                                |          |          |          |          |          |          |          |      |          |      |          |      |
|-------------------------------|------------------------------------------------------------------------------------------------------------------------------------------------|----------|----------|----------|----------|----------|----------|----------|------|----------|------|----------|------|
|                               | bacteriales;f__Acidobacteriac<br>eae_.Subgroup_1.;                                                                                             |          |          |          |          |          |          |          |      |          |      |          |      |
| Acidobacterium                | p__Acidobacteria;c__unidenti<br>fied_Acidobacteria;o__Acido<br>bacteriales;f__Acidobacteriac<br>eae_.Subgroup_1.;g__Acidob<br>acterium;        | 4.11E-05 | 2.05E-05 | 2.05E-05 | 3.07E-01 | 5.15E-01 | 5.82E-01 | 6.75E-01 | 2.00 | 1        | 1.00 | 8.62E-01 | 2.00 |
| Candidatus<br>Koribacter      | p__Acidobacteria;c__unidenti<br>fied_Acidobacteria;o__Acido<br>bacteriales;f__Acidobacteriac<br>eae_.Subgroup_1.;g__Candid<br>atus_Koribacter; | 4.11E-05 | 3.08E-05 | 2.05E-05 | 5.73E-01 | 4.02E-01 | 0        | 1        | 2.00 | 1        | 1.50 | 1        | 1.33 |
| Subgroup 17                   | p__Acidobacteria;c__unidenti<br>fied_Acidobacteria;o__Subgr<br>oup_17;                                                                         | 4.11E-05 | 2.05E-05 | 6.16E-05 | 3.03E-01 | 3.76E-01 | 0        | 1        | 0.67 | NA       | 0.33 | NA       | 2.00 |
| Subgroup 2                    | p__Acidobacteria;c__unidenti<br>fied_Acidobacteria;o__Subgr<br>oup_2;                                                                          | 4.11E-05 | 2.05E-05 | 4.11E-05 | 1.71E-01 | 5.32E-01 | 7.80E-02 | 1        | 1.00 | 8.00E-01 | 0.50 | 7.43E-01 | 2.00 |
| Subgroup 3                    | p__Acidobacteria;c__unidenti<br>fied_Acidobacteria;o__Subgr<br>oup_3;                                                                          | 6.16E-05 | 6.16E-05 | 4.11E-05 | 4.17E-01 | 2.66E-01 | 1        | 5.11E-01 | 1.50 | 1        | 1.50 | 1        | 1.00 |
| unidentified<br>Acidobacteria | p__Acidobacteria;c__unidenti<br>fied_Acidobacteria;o__Subgr<br>oup_3;f__unidentified_Acido<br>bacteria;                                        | 6.16E-05 | 4.11E-05 | 4.11E-05 | 2.52E-01 | 1.92E-01 | 1        | 2.85E-01 | 1.50 | 1        | 1.00 | 1        | 1.50 |

|                              |                                                                                                                      |          |          |          |          |          |   |          |      |          |      |          |      |
|------------------------------|----------------------------------------------------------------------------------------------------------------------|----------|----------|----------|----------|----------|---|----------|------|----------|------|----------|------|
| Bryobacter                   | p__Acidobacteria;c__unidentified_Acidobacteria;o__Subgroup_3;f__unidentified_Acidobacteria;g__Bryobacter;            | 6.16E-05 | 4.11E-05 | 4.11E-05 | 4.17E-01 | 3.31E-01 | 1 | 1        | 1.50 | 1        | 1.00 | 1        | 1.50 |
| Candidatus Solibacter        | p__Acidobacteria;c__unidentified_Acidobacteria;o__Subgroup_3;f__unidentified_Acidobacteria;g__Candidatus_Solibacter; | 5.14E-05 | 3.08E-05 | 4.11E-05 | 3.94E-01 | 4.49E-01 | 1 | 1        | 1.25 | 1        | 0.75 | 1        | 1.67 |
| Subgroup 4                   | p__Acidobacteria;c__unidentified_Acidobacteria;o__Subgroup_4;                                                        | 4.11E-05 | 2.05E-05 | 4.11E-05 | 1.93E-01 | 2.79E-01 | 1 | 6.65E-01 | 1.00 | 7.43E-01 | 0.50 | 9.99E-01 | 2.00 |
| 11-24                        | p__Acidobacteria;c__unidentified_Acidobacteria;o__Subgroup_4;f__11-24;                                               | 4.11E-05 | 2.05E-05 | 4.11E-05 | 1.86E-01 | 7.10E-01 | 0 | 1        | 1.00 | NA       | 0.50 | NA       | 2.00 |
| RB41                         | p__Acidobacteria;c__unidentified_Acidobacteria;o__Subgroup_4;f__RB41;                                                | 6.16E-05 | 2.05E-05 | 3.08E-05 | 1.86E-01 | 2.96E-01 | 1 | 4.59E-01 | 2.00 | 1        | 0.67 | 2.82E-01 | 3.00 |
| unidentified Acidobacteria-2 | p__Acidobacteria;c__unidentified_Acidobacteria;o__Subgroup_4;f__unidentified_Acidobacteria;                          | 4.11E-05 | 4.11E-05 | 2.05E-05 | 8.31E-01 | 6.98E-01 | 1 | 1        | 2.00 | 1        | 2.00 | 7.72E-01 | 1.00 |
| Blastocatella                | p__Acidobacteria;c__unidentified_Acidobacteria;o__Subgroup_4;f__unidentified_Acidobacteria;g__Blastocatella;         | 4.11E-05 | 4.11E-05 | 2.05E-05 | 8.29E-01 | 6.24E-01 | 1 | 9.53E-01 | 2.00 | 1        | 2.00 | 7.40E-01 | 1.00 |

|                              |                                                                                                                           |          |          |          |          |          |          |          |      |          |       |          |      |
|------------------------------|---------------------------------------------------------------------------------------------------------------------------|----------|----------|----------|----------|----------|----------|----------|------|----------|-------|----------|------|
| Subgroup 5                   | p__Acidobacteria;c__unidentified_Acidobacteria;o__Subgroup_5;                                                             | 4.11E-05 | 2.05E-05 | 0.000103 | 1.82E-01 | 5.32E-01 | 0        | 1        | 0.40 | NA       | 0.20  | NA       | 2.00 |
| Subgroup 6                   | p__Acidobacteria;c__unidentified_Acidobacteria;o__Subgroup_6;                                                             | 7.19E-05 | 2.05E-05 | 4.11E-05 | 1.78E-02 | 1.19E-01 | 7.80E-02 | 6.16E-01 | 1.75 | 1        | 0.50  | 8.03E-01 | 3.51 |
| unidentified Acidobacteria-1 | p__Acidobacteria;c__unidentified_Acidobacteria;o__Subgroup_6;f__unidentified_Acidobacteria;                               | 4.11E-05 | 2.05E-05 | 6.16E-05 | 4.23E-01 | 6.98E-01 | 0        | 1        | 0.67 | NA       | 0.33  | NA       | 2.00 |
| unidentified Acidobacteria   | p__Acidobacteria;c__unidentified_Acidobacteria;o__Subgroup_6;f__unidentified_Acidobacteria;g__unidentified_Acidobacteria; | 4.11E-05 | 2.05E-05 | 6.16E-05 | 4.03E-01 | 6.25E-01 | 0        | 1        | 0.67 | NA       | 0.33  | NA       | 2.00 |
| Actinobacteria               | p__Actinobacteria;                                                                                                        | 0.05821  | 0.034384 | 0.028971 | 1.00E-05 | 1.65E-06 | 9.11E-04 | 1.58E-03 | 2.01 | 1.75E-01 | 1.19  | 4.39E-01 | 1.69 |
| Acidimicrobiia               | p__Actinobacteria;c__Acidimicrobiia;                                                                                      | 6.16E-05 | 2.05E-05 | 4.11E-05 | 9.00E-03 | 1.04E-01 | 5.83E-01 | 2.52E-01 | 1.50 | 1        | 0.50  | 8.45E-01 | 3.00 |
| Acidimicrobiales             | p__Actinobacteria;c__Acidimicrobiia;o__Acidimicrobiales;                                                                  | 6.16E-05 | 2.05E-05 | 4.11E-05 | 8.49E-03 | 1.29E-01 | 6.98E-01 | 3.83E-01 | 1.50 | 7.14E-01 | 0.50  | 7.91E-01 | 3.00 |
| Acidimicrobiales             | p__Actinobacteria;c__Acidimicrobiia;o__Acidimicrobiales;f__Acidimicrobiales;                                              | 4.11E-05 | 4.11E-05 | 4.11E-05 | 9.75E-01 | 9.02E-01 | 0        | 1        | 1.00 | 1        | 1.00  | 1        | 1.00 |
| CL500-29 marine group        | p__Actinobacteria;c__Acidimicrobiia;o__Acidimicrobiales;                                                                  | 7.19E-05 | 0.000411 | 2.05E-05 | 3.23E-01 | 5.15E-01 | 0        | 1        | 3.51 | NA       | 20.04 | NA       | 0.18 |



|                   |                                                                                                  |          |          |          |          |          |          |          |      |          |      |          |      |
|-------------------|--------------------------------------------------------------------------------------------------|----------|----------|----------|----------|----------|----------|----------|------|----------|------|----------|------|
|                   | f__Acidimicrobiaceae;g__CL500-29_marine_group;                                                   |          |          |          |          |          |          |          |      |          |      |          |      |
| Iamiaceae         | p__Actinobacteria;c__Acidimicrobiia;o__Acidimicrobiales;f__Iamiaceae;                            | 4.11E-05 | 0        | 2.05E-05 | 8.52E-01 | 9.01E-01 | 0        | 1        | 2.00 | NA       | NA   | NA       | NA   |
| Iamia             | p__Actinobacteria;c__Acidimicrobiia;o__Acidimicrobiales;f__Iamiaceae;g__Iamia;                   | 4.11E-05 | 0        | 2.05E-05 | 8.54E-01 | 9.00E-01 | 0        | 1        | 2.00 | NA       | NA   | NA       | NA   |
| Coriobacteriia    | p__Actinobacteria;c__Coriobacteriia;                                                             | 0.001356 | 0.000986 | 0.000637 | 3.34E-08 | 5.33E-09 | 3.94E-07 | 6.44E-06 | 2.13 | 1.47E-01 | 1.55 | 2.65E-01 | 1.37 |
| Coriobacteriales  | p__Actinobacteria;c__Coriobacteriia;o__Coriobacteriales;                                         | 0.001356 | 0.000986 | 0.000637 | 4.20E-08 | 1.01E-08 | 2.39E-07 | 1.61E-05 | 2.13 | 1.17E-01 | 1.55 | 3.87E-01 | 1.37 |
| Coriobacteriaceae | p__Actinobacteria;c__Coriobacteriia;o__Coriobacteriales;f__Coriobacteriaceae;                    | 0.001356 | 0.000986 | 0.000637 | 3.45E-08 | 8.25E-09 | 7.98E-07 | 9.33E-06 | 2.13 | 2.57E-01 | 1.55 | 3.04E-01 | 1.37 |
| Atopobium         | p__Actinobacteria;c__Coriobacteriia;o__Coriobacteriales;f__Coriobacteriaceae;g__Atopobium;       | 0.00113  | 0.000863 | 0.000555 | 1.35E-07 | 5.81E-08 | 4.78E-07 | 1.83E-04 | 2.04 | 1.89E-01 | 1.56 | 9.91E-01 | 1.31 |
| Cryptobacterium   | p__Actinobacteria;c__Coriobacteriia;o__Coriobacteriales;f__Coriobacteriaceae;g__Cryptobacterium; | 2.05E-05 | 2.05E-05 | 2.05E-05 | 8.63E-01 | 1        | 1        | 1        | 1.00 | 1        | 1.00 | 1        | 1.00 |
| Olsenella         | p__Actinobacteria;c__Coriobacteriia;o__Coriobacteriales;f                                        | 6.16E-05 | 6.16E-05 | 6.16E-05 | 3.38E-01 | 2.08E-01 | 1        | 3.03E-01 | 1.00 | 9.73E-01 | 1.00 | 1        | 1.00 |

|                   |                                                                                             |          |          |          |          |          |          |          |      |          |      |          |      |
|-------------------|---------------------------------------------------------------------------------------------|----------|----------|----------|----------|----------|----------|----------|------|----------|------|----------|------|
|                   | __Coriobacteriaceae;g__Olsenella;                                                           |          |          |          |          |          |          |          |      |          |      |          |      |
| Slackia           | p__Actinobacteria;c__Coriobacteriia;o__Coriobacteriales;f__Coriobacteriaceae;g__Slackia;    | 4.11E-05 | 4.11E-05 | 2.05E-05 | 2.46E-01 | 1.66E-01 | 4.00E-02 | 1.79E-01 | 2.00 | 1        | 2.00 | 1        | 1.00 |
| MB-A2-108         | p__Actinobacteria;c__MB-A2-108;                                                             | 4.11E-05 | 0        | 4.11E-05 | 4.66E-01 | 5.68E-01 | 0        | 1        | 1.00 | NA       | NA   | NA       | NA   |
| Rubrobacteria     | p__Actinobacteria;c__Rubrobacteria;                                                         | 4.11E-05 | 4.11E-05 | 4.11E-05 | 8.14E-01 | 6.25E-01 | 1        | 9.22E-01 | 1.00 | 1        | 1.00 | 1        | 1.00 |
| Rubrobacteriales  | p__Actinobacteria;c__Rubrobacteria;o__Rubrobacteriales;                                     | 4.11E-05 | 4.11E-05 | 4.11E-05 | 8.26E-01 | 7.14E-01 | 1        | 9.29E-01 | 1.00 | 8.87E-01 | 1.00 | 1        | 1.00 |
| Rubrobacteriaceae | p__Actinobacteria;c__Rubrobacteria;o__Rubrobacteriales;f__Rubrobacteriaceae;                | 4.11E-05 | 4.11E-05 | 4.11E-05 | 8.31E-01 | 6.98E-01 | 1        | 9.63E-01 | 1.00 | 9.70E-01 | 1.00 | 1        | 1.00 |
| Rubrobacter       | p__Actinobacteria;c__Rubrobacteria;o__Rubrobacteriales;f__Rubrobacteriaceae;g__Rubrobacter; | 4.11E-05 | 4.11E-05 | 4.11E-05 | 8.29E-01 | 6.23E-01 | 1        | 9.61E-01 | 1.00 | 9.47E-01 | 1.00 | 1        | 1.00 |
| Thermoleophilia   | p__Actinobacteria;c__Thermoleophilia;                                                       | 0.000103 | 4.11E-05 | 6.16E-05 | 1.59E-03 | 2.86E-02 | 4.98E-04 | 7.76E-02 | 1.67 | 1        | 0.67 | 4.83E-02 | 2.50 |
| Gaiellales        | p__Actinobacteria;c__Thermoleophilia;o__Gaiellales;                                         | 6.16E-05 | 2.05E-05 | 6.16E-05 | 3.03E-02 | 7.44E-01 | 4.53E-01 | 8.71E-01 | 1.00 | 7.83E-01 | 0.33 | 7.91E-01 | 3.00 |
| Gaiellaceae       | p__Actinobacteria;c__Thermoleophilia;o__Gaiellales;f__Gaiellaceae;                          | 4.11E-05 | 2.05E-05 | 5.14E-05 | 2.29E-01 | 9.18E-01 | 1        | 1        | 0.80 | 1        | 0.40 | 1        | 2.00 |

|                         |                                                                                                      |          |          |          |          |          |          |          |      |          |      |          |      |
|-------------------------|------------------------------------------------------------------------------------------------------|----------|----------|----------|----------|----------|----------|----------|------|----------|------|----------|------|
| Gaiella                 | p_Actinobacteria;c_Thermoleophilia;o_Gaiellales;f_Gaiellaceae;g_Gaiella;                             | 4.11E-05 | 2.05E-05 | 5.14E-05 | 2.08E-01 | 9.33E-01 | 1        | 1        | 0.80 | 1        | 0.40 | 1        | 2.00 |
| unidentified Gaiellales | p_Actinobacteria;c_Thermoleophilia;o_Gaiellales;f_unidentified_Gaiellales;                           | 4.11E-05 | 2.05E-05 | 2.05E-05 | 1.90E-01 | 3.73E-01 | 1        | 1        | 2.00 | 1        | 1.00 | 1        | 2.00 |
| unidentified Gaiellales | p_Actinobacteria;c_Thermoleophilia;o_Gaiellales;f_unidentified_Gaiellales;g_unidentified_Gaiellales; | 4.11E-05 | 2.05E-05 | 2.05E-05 | 1.77E-01 | 3.31E-01 | 1        | 1        | 2.00 | 1        | 1.00 | 1        | 2.00 |
| Solirubrobacterales     | p_Actinobacteria;c_Thermoleophilia;o_Solirubrobacterales;                                            | 8.22E-05 | 4.11E-05 | 6.16E-05 | 4.86E-02 | 1.69E-01 | 1.96E-04 | 2.11E-01 | 1.33 | 7.74E-01 | 0.67 | 2.51E-01 | 2.00 |
| 0319-6M6                | p_Actinobacteria;c_Thermoleophilia;o_Solirubrobacterales;f_0319-6M6;                                 | 6.16E-05 | 2.05E-05 | 4.11E-05 | 3.87E-01 | 4.32E-01 | 0        | 1        | 1.50 | NA       | 0.50 | NA       | 3.00 |
| 288-2                   | p_Actinobacteria;c_Thermoleophilia;o_Solirubrobacterales;f_288-2;                                    | 4.11E-05 | 5.14E-05 | 2.05E-05 | 5.99E-01 | 6.84E-01 | 0        | 1        | 2.00 | 1        | 2.50 | 1        | 0.80 |
| 480-2                   | p_Actinobacteria;c_Thermoleophilia;o_Solirubrobacterales;f_480-2;                                    | 5.14E-05 | 4.11E-05 | 4.11E-05 | 9.68E-01 | 8.32E-01 | 1        | 1        | 1.25 | NA       | 1.00 | NA       | 1.25 |
| Patulibacteraceae       | p_Actinobacteria;c_Thermoleophilia;o_Solirubrobacterales;f_Patulibacteraceae;                        | 5.14E-05 | 2.05E-05 | 6.16E-05 | 5.77E-01 | 7.89E-01 | 0        | 1        | 0.83 | NA       | 0.33 | NA       | 2.50 |

|                             |                                                                                                          |          |          |          |          |          |          |          |      |          |      |          |      |
|-----------------------------|----------------------------------------------------------------------------------------------------------|----------|----------|----------|----------|----------|----------|----------|------|----------|------|----------|------|
| Patulibacter                | p__Actinobacteria;c__Thermoleophilia;o__Solirubrobacteriales;f__Patulibacteraceae;g__Patulibacter;       | 5.14E-05 | 2.05E-05 | 6.16E-05 | 5.70E-01 | 7.39E-01 | 0        | 9.68E-01 | 0.83 | NA       | 0.33 | NA       | 2.50 |
| Solirubrobacteraceae        | p__Actinobacteria;c__Thermoleophilia;o__Solirubrobacteriales;f__Solirubrobacteraceae;                    | 4.11E-05 | 4.11E-05 | 4.11E-05 | 9.90E-01 | 9.57E-01 | 8.34E-01 | 1        | 1.00 | 1        | 1.00 | 1        | 1.00 |
| Solirubrobacter             | p__Actinobacteria;c__Thermoleophilia;o__Solirubrobacteriales;f__Solirubrobacteraceae;g__Solirubrobacter; | 4.11E-05 | 4.11E-05 | 4.11E-05 | 9.94E-01 | 9.78E-01 | 1        | 9.65E-01 | 1.00 | 1        | 1.00 | 1        | 1.00 |
| YNPFFP1                     | p__Actinobacteria;c__Thermoleophilia;o__Solirubrobacteriales;f__YNPFFP1;                                 | 4.11E-05 | 2.05E-05 | 4.11E-05 | 2.99E-01 | 7.85E-01 | 1        | 1        | 1.00 | 1        | 0.50 | 8.35E-01 | 2.00 |
| unidentified Actinobacteria | p__Actinobacteria;c__unidentified_Actinobacteria;                                                        | 0.054841 | 0.032699 | 0.02588  | 9.30E-06 | 1.59E-06 | 2.20E-04 | 5.33E-04 | 2.12 | 1.47E-01 | 1.26 | 4.53E-01 | 1.68 |
| Actinomycetales             | p__Actinobacteria;c__unidentified_Actinobacteria;o__Actinomycetales;                                     | 0.013659 | 0.01333  | 0.005607 | 1.08E-05 | 2.02E-05 | 3.76E-05 | 4.40E-04 | 2.44 | 3.67E-03 | 2.38 | 1        | 1.02 |
| Actinomycetales             | p__Actinobacteria;c__unidentified_Actinobacteria;o__Actinomycetales;f__Actinomycetales;                  | 0.013659 | 0.01333  | 0.005607 | 8.74E-06 | 2.06E-05 | 2.52E-04 | 7.64E-04 | 2.44 | 8.22E-03 | 2.38 | 1        | 1.02 |
| Actinomyces                 | p__Actinobacteria;c__unidentified_Actinobacteria;o__Acti                                                 | 0.009736 | 0.012262 | 0.005351 | 6.47E-05 | 1.33E-03 | 1.57E-04 | 4.23E-04 | 1.82 | 4.82E-03 | 2.29 | 3.07E-01 | 0.79 |

|                    |                                                                                                                 |          |          |          |          |          |          |          |      |          |      |          |      |
|--------------------|-----------------------------------------------------------------------------------------------------------------|----------|----------|----------|----------|----------|----------|----------|------|----------|------|----------|------|
|                    | nomycetales;f__Actinomycetaceae;g__Actinomyces;                                                                 |          |          |          |          |          |          |          |      |          |      |          |      |
| Mobiluncus         | p__Actinobacteria;c__unidentified_Actinobacteria;o__Actinomycetales;f__Actinomycetaceae;g__Mobiluncus;          | 0.001191 | 0.000226 | 0.000298 | 2.91E-09 | 2.84E-07 | 4.14E-11 | 2.88E-02 | 4.00 | 1        | 0.76 | 3.16E-01 | 5.27 |
| Bifidobacteriales  | p__Actinobacteria;c__unidentified_Actinobacteria;o__Bifidobacteriales;                                          | 0.000123 | 0.000113 | 9.24E-05 | 2.21E-01 | 1.29E-01 | 1        | 2.66E-01 | 1.33 | 7.14E-01 | 1.22 | 8.20E-01 | 1.09 |
| Bifidobacteriaceae | p__Actinobacteria;c__unidentified_Actinobacteria;o__Bifidobacteriales;f__Bifidobacteriaceae;                    | 0.000123 | 0.000113 | 9.24E-05 | 2.18E-01 | 1.24E-01 | 1        | 2.65E-01 | 1.33 | 7.76E-01 | 1.22 | 8.35E-01 | 1.09 |
| Bifidobacterium    | p__Actinobacteria;c__unidentified_Actinobacteria;o__Bifidobacteriales;f__Bifidobacteriaceae;g__Bifidobacterium; | 4.11E-05 | 4.11E-05 | 4.11E-05 | 7.80E-01 | 9.95E-01 | 1        | 1        | 1.00 | 1        | 1.00 | 1        | 1.00 |
| Scardovia          | p__Actinobacteria;c__unidentified_Actinobacteria;o__Bifidobacteriales;f__Bifidobacteriaceae;g__Scardovia;       | 6.16E-05 | 8.22E-05 | 6.16E-05 | 2.56E-01 | 5.88E-01 | 4.65E-02 | 1        | 1.00 | 3.62E-01 | 1.33 | 1        | 0.75 |
| Corynebacteriales  | p__Actinobacteria;c__unidentified_Actinobacteria;o__Corynebacteriales;                                          | 0.001315 | 0.001294 | 0.001119 | 2.65E-01 | 1.49E-01 | 1        | 7.12E-01 | 1.17 | 1.85E-01 | 1.16 | 8.20E-01 | 1.02 |
| Corynebacteriaceae | p__Actinobacteria;c__unidentified_Actinobacteria;o__Corynebacteriales;                                          | 0.001212 | 0.001171 | 0.000996 | 2.68E-01 | 1.60E-01 | 1        | 5.49E-01 | 1.22 | 4.75E-01 | 1.18 | 7.92E-01 | 1.04 |

|                   |                                                                                                                |          |          |          |          |          |   |          |      |   |      |          |      |
|-------------------|----------------------------------------------------------------------------------------------------------------|----------|----------|----------|----------|----------|---|----------|------|---|------|----------|------|
|                   | neobacterales;f__Corynebacterales;<br>riaceae;                                                                 |          |          |          |          |          |   |          |      |   |      |          |      |
| Corynebacterium   | p__Actinobacteria;c__unidentified_Actinobacteria;o__Corynebacterales;f__Corynebacterales;g__Corynebacterium;   | 0.001089 | 0.000822 | 0.00075  | 5.60E-02 | 3.54E-02 | 1 | 2.32E-01 | 1.45 | 1 | 1.10 | 3.08E-01 | 1.33 |
| Corynebacterium 1 | p__Actinobacteria;c__unidentified_Actinobacteria;o__Corynebacterales;f__Corynebacterales;g__Corynebacterium_1; | 4.11E-05 | 5.14E-05 | 4.11E-05 | 8.58E-01 | 9.78E-01 | 1 | 1        | 1.00 | 1 | 1.25 | 1        | 0.80 |
| Mycobacteriaceae  | p__Actinobacteria;c__unidentified_Actinobacteria;o__Corynebacterales;f__Mycobacteriaceae;                      | 6.16E-05 | 4.11E-05 | 4.11E-05 | 6.72E-01 | 5.81E-01 | 1 | 1        | 1.50 | 1 | 1.00 | 1        | 1.50 |
| Mycobacterium     | p__Actinobacteria;c__unidentified_Actinobacteria;o__Corynebacterales;f__Mycobacteriaceae;g__Mycobacterium;     | 6.16E-05 | 4.11E-05 | 4.11E-05 | 6.73E-01 | 5.15E-01 | 1 | 1        | 1.50 | 1 | 1.00 | 1        | 1.50 |
| Nocardiaceae      | p__Actinobacteria;c__unidentified_Actinobacteria;o__Corynebacterales;f__Nocardiaceae;                          | 4.11E-05 | 4.11E-05 | 4.11E-05 | 4.85E-01 | 3.51E-01 | 1 | 1        | 1.00 | 1 | 1.00 | 1        | 1.00 |
| Rhodococcus       | p__Actinobacteria;c__unidentified_Actinobacteria;o__Corynebacterales;f__Rhodococcus;                           | 4.11E-05 | 3.08E-05 | 4.11E-05 | 9.41E-01 | 9.67E-01 | 1 | 1        | 1.00 | 1 | 0.75 | 3.73E-01 | 1.33 |

|                     |                                                                                                    |          |          |          |          |          |          |          |      |          |      |          |      |
|---------------------|----------------------------------------------------------------------------------------------------|----------|----------|----------|----------|----------|----------|----------|------|----------|------|----------|------|
|                     | neobacterales;f__Nocardiaceae;g__Rhodococcus;                                                      |          |          |          |          |          |          |          |      |          |      |          |      |
| Frankiales          | p__Actinobacteria;c__unidentified_Actinobacteria;o__Frankiales;                                    | 6.16E-05 | 4.11E-05 | 6.16E-05 | 3.70E-01 | 9.17E-01 | 4.50E-01 | 1        | 1.00 | 8.87E-01 | 0.67 | 7.91E-01 | 1.50 |
| Acidothermaceae     | p__Actinobacteria;c__unidentified_Actinobacteria;o__Frankiales;f__Acidothermaceae;                 | 4.11E-05 | 4.11E-05 | 2.05E-05 | 2.01E-01 | 1.59E-01 | 1        | 1        | 2.00 | 1        | 2.00 | 1        | 1.00 |
| Acidothermus        | p__Actinobacteria;c__unidentified_Actinobacteria;o__Frankiales;f__Acidothermaceae;g__Acidothermus; | 4.11E-05 | 4.11E-05 | 2.05E-05 | 1.85E-01 | 1.26E-01 | 1        | 9.65E-01 | 2.00 | 1        | 2.00 | 1        | 1.00 |
| Frankiaceae         | p__Actinobacteria;c__unidentified_Actinobacteria;o__Frankiales;f__Frankiaceae;                     | 4.11E-05 | 6.16E-05 | 6.16E-05 | 9.41E-01 | 9.54E-01 | 0        | 1        | 0.67 | 1        | 1.00 | 1        | 0.67 |
| Jatrophihabitans    | p__Actinobacteria;c__unidentified_Actinobacteria;o__Frankiales;f__Frankiaceae;g__Jatrophihabitans; | 6.17E-05 | 6.16E-05 | 4.11E-05 | 7.03E-01 | 4.83E-01 | 0        | 1        | 1.50 | 1        | 1.50 | 8.63E-01 | 1.00 |
| Geodermatophilaceae | p__Actinobacteria;c__unidentified_Actinobacteria;o__Frankiales;f__Geodermatophilaceae;             | 6.16E-05 | 4.11E-05 | 4.11E-05 | 5.96E-01 | 7.85E-01 | 1        | 1        | 1.50 | 9.49E-01 | 1.00 | 8.35E-01 | 1.50 |
| Blastococcus        | p__Actinobacteria;c__unidentified_Actinobacteria;o__Frankiales;                                    | 4.11E-05 | 4.11E-05 | 6.16E-05 | 4.77E-01 | 9.78E-01 | 1        | 1        | 0.67 | 1        | 0.67 | 9.66E-01 | 1.00 |

|                   |                                                                                                           |          |          |          |          |          |          |          |      |          |       |          |      |
|-------------------|-----------------------------------------------------------------------------------------------------------|----------|----------|----------|----------|----------|----------|----------|------|----------|-------|----------|------|
|                   | kiales;f__Geodermatophilaceae;g__Blastococcus;                                                            |          |          |          |          |          |          |          |      |          |       |          |      |
| Sporichthyaceae   | p__Actinobacteria;c__unidentified_Actinobacteria;o__Frankiales;f__Sporichthyaceae;                        | 5.14E-05 | 0.002526 | 4.11E-05 | 2.52E-01 | 4.34E-01 | 0        | 1        | 1.25 | NA       | 61.47 | NA       | 0.02 |
| Kineosporiales    | p__Actinobacteria;c__unidentified_Actinobacteria;o__Kineosporiales;                                       | 3.08E-05 | 4.11E-05 | 6.16E-05 | 8.30E-01 | 9.80E-01 | 4.02E-02 | 1        | 0.50 | 1        | 0.67  | 9.99E-01 | 0.75 |
| Kineosporiaceae   | p__Actinobacteria;c__unidentified_Actinobacteria;o__Kineosporiales;f__Kineosporiaceae;                    | 3.08E-05 | 4.11E-05 | 6.16E-05 | 8.31E-01 | 9.57E-01 | 1        | 1        | 0.50 | 1        | 0.67  | 1        | 0.75 |
| Micrococcales     | p__Actinobacteria;c__unidentified_Actinobacteria;o__Micrococcales;                                        | 0.031015 | 0.0213   | 0.013875 | 3.41E-05 | 1.15E-05 | 9.13E-04 | 3.65E-04 | 2.24 | 1.32E-01 | 1.54  | 3.70E-01 | 1.46 |
| Brevibacteriaceae | p__Actinobacteria;c__unidentified_Actinobacteria;o__Micrococcales;f__Brevibacteriaceae;                   | 2.05E-05 | 4.11E-05 | 4.11E-05 | 8.31E-01 | 6.98E-01 | 1        | 7.46E-01 | 0.50 | 1        | 1.00  | 1        | 0.50 |
| Brevibacterium    | p__Actinobacteria;c__unidentified_Actinobacteria;o__Micrococcales;f__Brevibacteriaceae;g__Brevibacterium; | 2.05E-05 | 4.11E-05 | 4.11E-05 | 8.24E-01 | 6.25E-01 | 1        | 4.86E-01 | 0.50 | 1        | 1.00  | 1        | 0.50 |
| Dermabacteraceae  | p__Actinobacteria;c__unidentified_Actinobacteria;o__Micrococcales;                                        | 4.11E-05 | 3.08E-05 | 2.05E-05 | 2.45E-01 | 1.67E-01 | 1        | 2.17E-01 | 2.00 | 1        | 1.50  | 7.92E-01 | 1.33 |



|                    |                                                                                                           |          |          |          |          |          |   |          |      |          |      |          |      |
|--------------------|-----------------------------------------------------------------------------------------------------------|----------|----------|----------|----------|----------|---|----------|------|----------|------|----------|------|
|                    | ococcales;f__Dermabacteraceae;                                                                            |          |          |          |          |          |   |          |      |          |      |          |      |
| Brachybacterium    | p__Actinobacteria;c__unidentified_Actinobacteria;o__Micrococcales;f__Dermabacteraceae;g__Brachybacterium; | 4.11E-05 | 3.08E-05 | 2.05E-05 | 2.04E-01 | 1.23E-01 | 1 | 4.48E-02 | 2.00 | 1        | 1.50 | 9.66E-01 | 1.33 |
| Dermacoccaceae     | p__Actinobacteria;c__unidentified_Actinobacteria;o__Micrococcales;f__Dermacoccaceae;                      | 4.11E-05 | 2.05E-05 | 4.11E-05 | 5.05E-01 | 7.90E-01 | 1 | 1        | 1.00 | 1        | 0.50 | 9.74E-01 | 2.00 |
| Kytococcus         | p__Actinobacteria;c__unidentified_Actinobacteria;o__Micrococcales;f__Dermacoccaceae;g__Kytococcus;        | 4.11E-05 | 2.05E-05 | 4.11E-05 | 4.84E-01 | 7.51E-01 | 1 | 9.65E-01 | 1.00 | 1        | 0.50 | 9.91E-01 | 2.00 |
| Intrasporangiaceae | p__Actinobacteria;c__unidentified_Actinobacteria;o__Micrococcales;f__Intrasporangiaceae;                  | 6.16E-05 | 2.05E-05 | 4.11E-05 | 9.55E-02 | 1.49E-01 | 1 | 8.06E-01 | 1.50 | 1        | 0.50 | 1        | 3.00 |
| Oryzihumus         | p__Actinobacteria;c__unidentified_Actinobacteria;o__Micrococcales;f__Intrasporangiaceae;g__Oryzihumus;    | 4.11E-05 | 6.16E-05 | 8.21E-05 | 8.24E-01 | 5.88E-01 | 0 | 1        | 0.50 | NA       | 0.75 | NA       | 0.67 |
| Microbacteriaceae  | p__Actinobacteria;c__unidentified_Actinobacteria;o__Micrococcales;f__Microbacteriaceae;                   | 6.16E-05 | 4.11E-05 | 8.22E-05 | 5.49E-02 | 7.11E-01 | 1 | 8.51E-01 | 0.75 | 2.69E-01 | 0.50 | 2.19E-01 | 1.50 |

|                     |                                                                                                           |          |          |          |          |          |          |          |      |          |      |          |      |
|---------------------|-----------------------------------------------------------------------------------------------------------|----------|----------|----------|----------|----------|----------|----------|------|----------|------|----------|------|
| Candidatus Aquiluna | p_Actinobacteria;c_unidentified_Actinobacteria;o_Micrococcales;f_Microbacteriaceae;g_Candidatus_Aquiluna; | 2.05E-05 | 4.11E-05 | 4.11E-05 | 7.98E-01 | 6.24E-01 | 0        | 9.24E-01 | 0.50 | 1        | 1.00 | 9.89E-01 | 0.50 |
| Leifsonia           | p_Actinobacteria;c_unidentified_Actinobacteria;o_Micrococcales;f_Microbacteriaceae;g_Leifsonia;           | 4.11E-05 | 5.14E-05 | 6.16E-05 | 8.39E-01 | 8.52E-01 | 1        | 1        | 0.67 | 1        | 0.83 | 9.84E-01 | 0.80 |
| Microbacterium      | p_Actinobacteria;c_unidentified_Actinobacteria;o_Micrococcales;f_Microbacteriaceae;g_Microbacterium;      | 2.05E-05 | 4.11E-05 | 2.05E-05 | 9.98E-01 | 9.78E-01 | 1        | 9.53E-01 | 1.00 | 1        | 2.00 | 1        | 0.50 |
| ML602J-51           | p_Actinobacteria;c_unidentified_Actinobacteria;o_Micrococcales;f_Microbacteriaceae;g_ML602J-51;           | 6.16E-05 | 4.11E-05 | 4.11E-05 | 3.53E-01 | 2.28E-01 | 0        | 6.87E-01 | 1.50 | 1        | 1.00 | 1        | 1.50 |
| Micrococcaceae      | p_Actinobacteria;c_unidentified_Actinobacteria;o_Micrococcales;f_Micrococcaceae;                          | 0.030728 | 0.021259 | 0.013772 | 2.94E-05 | 1.19E-05 | 4.50E-03 | 7.64E-04 | 2.23 | 1.67E-01 | 1.54 | 3.04E-01 | 1.45 |
| Arthrobacter        | p_Actinobacteria;c_unidentified_Actinobacteria;o_Micrococcales;f_Micrococcaceae;g_Arthrobacter;           | 6.16E-05 | 6.16E-05 | 4.11E-05 | 4.42E-01 | 2.87E-01 | 1        | 1        | 1.50 | 1        | 1.50 | 9.14E-01 | 1.00 |
| Kocuria             | p_Actinobacteria;c_unidentified_Actinobacteria;o_Micr                                                     | 4.11E-05 | 2.05E-05 | 3.08E-05 | 6.16E-01 | 4.85E-01 | 6.50E-01 | 1        | 1.33 | 1        | 0.67 | 5.05E-01 | 2.00 |

|                         |                                                                                                                 |          |          |          |          |          |          |          |      |          |      |          |      |
|-------------------------|-----------------------------------------------------------------------------------------------------------------|----------|----------|----------|----------|----------|----------|----------|------|----------|------|----------|------|
|                         | ococcales;f__Micrococcaceae<br>;g__Kocuria;                                                                     |          |          |          |          |          |          |          |      |          |      |          |      |
| Micrococcus             | p__Actinobacteria;c__unident<br>ified_Actinobacteria;o__Micr<br>ococcales;f__Micrococcaceae<br>;g__Micrococcus; | 4.11E-05 | 4.11E-05 | 4.11E-05 | 6.02E-01 | 5.23E-01 | 1        | 6.12E-01 | 1.00 | 1        | 1.00 | 1        | 1.00 |
| Rothia                  | p__Actinobacteria;c__unident<br>ified_Actinobacteria;o__Micr<br>ococcales;f__Micrococcaceae<br>;g__Rothia;      | 0.030625 | 0.021218 | 0.013382 | 2.98E-05 | 8.99E-06 | 2.54E-03 | 6.28E-05 | 2.29 | 8.48E-02 | 1.59 | 2.33E-01 | 1.44 |
| Micromonospor<br>ales   | p__Actinobacteria;c__unident<br>ified_Actinobacteria;o__Micr<br>omonosporales;                                  | 4.11E-05 | 3.08E-05 | 6.16E-05 | 7.54E-01 | 9.95E-01 | 1        | 1        | 0.67 | 9.62E-01 | 0.50 | 1        | 1.33 |
| Micromonospor<br>aceae  | p__Actinobacteria;c__unident<br>ified_Actinobacteria;o__Micr<br>omonosporales;f__Micromon<br>osporaceae;        | 4.11E-05 | 3.08E-05 | 6.16E-05 | 7.62E-01 | 9.92E-01 | 1        | 1        | 0.67 | 1        | 0.50 | 1        | 1.33 |
| Propionibacteria<br>les | p__Actinobacteria;c__unident<br>ified_Actinobacteria;o__Propi<br>onibacteriales;                                | 0.000267 | 8.22E-05 | 8.22E-05 | 1.90E-05 | 9.48E-05 | 1.07E-05 | 4.07E-03 | 3.25 | 1        | 1.00 | 1.44E-01 | 3.25 |
| Nocardioideace<br>e     | p__Actinobacteria;c__unident<br>ified_Actinobacteria;o__Propi<br>onibacteriales;f__Nocardioida<br>ceae;         | 6.16E-05 | 4.11E-05 | 4.11E-05 | 5.45E-01 | 6.11E-01 | 1        | 3.46E-01 | 1.50 | 1        | 1.00 | 3.62E-01 | 1.50 |
| Kribbella               | p__Actinobacteria;c__unident<br>ified_Actinobacteria;o__Propi                                                   | 4.11E-05 | 0        | 3.08E-05 | 5.58E-01 | 6.23E-01 | 0        | 1        | 1.33 | NA       | NA   | NA       | NA   |

|                          |                                                                                                                                       |          |          |          |          |          |          |          |      |   |      |          |      |
|--------------------------|---------------------------------------------------------------------------------------------------------------------------------------|----------|----------|----------|----------|----------|----------|----------|------|---|------|----------|------|
|                          | onibacteriales;f__Nocardioida<br>ceae;g__Kribbella;                                                                                   |          |          |          |          |          |          |          |      |   |      |          |      |
| Marmoricola              | p__Actinobacteria;c__unident<br>ified_Actinobacteria;o__Propi<br>onibacteriales;f__Nocardioida<br>ceae;g__Marmoricola;                | 4.11E-05 | 2.05E-05 | 4.11E-05 | 6.27E-01 | 9.78E-01 | 1        | 1        | 1.00 | 1 | 0.50 | 1        | 2.00 |
| Nocardioides             | p__Actinobacteria;c__unident<br>ified_Actinobacteria;o__Propi<br>onibacteriales;f__Nocardioida<br>ceae;g__Nocardioides;               | 6.16E-05 | 4.11E-05 | 4.11E-05 | 1.79E-01 | 1.64E-01 | 1        | 5.21E-01 | 1.50 | 1 | 1.00 | 9.91E-01 | 1.50 |
| Propionibacteria<br>ceae | p__Actinobacteria;c__unident<br>ified_Actinobacteria;o__Propi<br>onibacteriales;f__Propionibac<br>teriaceae;                          | 0.000216 | 6.16E-05 | 8.22E-05 | 1.26E-06 | 1.19E-05 | 1.45E-02 | 1.40E-02 | 2.62 | 1 | 0.75 | 2.38E-01 | 3.50 |
| Propionibacteriu<br>m    | p__Actinobacteria;c__unident<br>ified_Actinobacteria;o__Propi<br>onibacteriales;f__Propionibac<br>teriaceae;g__Propionibacteriu<br>m; | 6.16E-05 | 4.11E-05 | 6.16E-05 | 1.72E-01 | 1.06E-01 | 3.25E-01 | 2.32E-01 | 1.00 | 1 | 0.67 | 5.75E-01 | 1.50 |
| Pseudonocardial<br>es    | p__Actinobacteria;c__unident<br>ified_Actinobacteria;o__Pseu<br>donocardiales;                                                        | 4.11E-05 | 3.08E-05 | 2.05E-05 | 3.24E-01 | 2.55E-01 | 7.80E-02 | 3.14E-01 | 2.00 | 1 | 1.50 | 1        | 1.33 |
| Pseudonocardia<br>ceae   | p__Actinobacteria;c__unident<br>ified_Actinobacteria;o__Pseu<br>donocardiales;f__Pseudonoca<br>rdiaceae;                              | 4.11E-05 | 3.08E-05 | 2.05E-05 | 3.31E-01 | 2.57E-01 | 3.10E-01 | 2.32E-01 | 2.00 | 1 | 1.50 | 1        | 1.33 |

|                     |                                                                                                               |          |          |          |          |          |          |          |      |          |      |          |      |
|---------------------|---------------------------------------------------------------------------------------------------------------|----------|----------|----------|----------|----------|----------|----------|------|----------|------|----------|------|
| Pseudonocardia      | p__Actinobacteria;c__unidentified_Actinobacteria;o__Pseudonocardiales;f__Pseudonocardaceae;g__Pseudonocardia; | 4.11E-05 | 6.16E-05 | 2.05E-05 | 3.07E-01 | 2.39E-01 | 0        | 1        | 2.00 | 1        | 3.00 | 1        | 0.67 |
| Streptomycetales    | p__Actinobacteria;c__unidentified_Actinobacteria;o__Streptomycetales;                                         | 4.11E-05 | 4.11E-05 | 4.11E-05 | 9.60E-01 | 9.61E-01 | 1        | 1        | 1.00 | 6.69E-01 | 1.00 | 1        | 1.00 |
| Streptomycetales    | p__Actinobacteria;c__unidentified_Actinobacteria;o__Streptomycetales;f__Streptomycetales;                     | 4.11E-05 | 4.11E-05 | 4.11E-05 | 9.68E-01 | 9.18E-01 | 1        | 1        | 1.00 | 6.84E-01 | 1.00 | 1        | 1.00 |
| Streptomyces        | p__Actinobacteria;c__unidentified_Actinobacteria;o__Streptomycetales;f__Streptomycetales;g__Streptomyces;     | 4.11E-05 | 4.11E-05 | 4.11E-05 | 9.61E-01 | 9.29E-01 | 1        | 1        | 1.00 | 6.01E-01 | 1.00 | 1        | 1.00 |
| Streptosporangiales | p__Actinobacteria;c__unidentified_Actinobacteria;o__Streptosporangiales;                                      | 4.11E-05 | 2.05E-05 | 7.19E-05 | 2.56E-01 | 9.80E-01 | 0        | 1        | 0.57 | NA       | 0.29 | NA       | 2.00 |
| Armatimonadetes     | p__Armatimonadetes;                                                                                           | 6.16E-05 | 4.11E-05 | 4.11E-05 | 3.54E-01 | 4.26E-01 | 1        | 9.75E-01 | 1.50 | 1        | 1.00 | 1        | 1.50 |
| Bacteroidetes       | p__Bacteroidetes;                                                                                             | 0.05897  | 0.077045 | 0.032689 | 4.61E-03 | 3.87E-02 | 1.31E-01 | 8.48E-02 | 1.80 | 7.01E-02 | 2.36 | 7.85E-01 | 0.77 |
| Bacteroidia         | p__Bacteroidetes;c__Bacteroidia;                                                                              | 0.053178 | 0.06125  | 0.022101 | 5.97E-04 | 4.16E-03 | 1.19E-03 | 1.89E-02 | 2.41 | 8.60E-02 | 2.77 | 1        | 0.87 |
| Bacteroidales       | p__Bacteroidetes;c__Bacteroidia;o__Bacteroidales;                                                             | 0.053178 | 0.06125  | 0.022101 | 6.11E-04 | 5.10E-03 | 1.68E-03 | 2.05E-02 | 2.41 | 7.49E-02 | 2.77 | 8.82E-01 | 0.87 |

|                                 |                                                                                            |          |          |          |          |          |          |          |      |          |      |          |       |
|---------------------------------|--------------------------------------------------------------------------------------------|----------|----------|----------|----------|----------|----------|----------|------|----------|------|----------|-------|
| Bacteroidaceae                  | p__Bacteroidetes;c__Bacteroidia;o__Bacteroidales;f__Bacteroidaceae;                        | 0.000246 | 0.000288 | 0.000144 | 3.43E-04 | 6.18E-02 | 3.30E-10 | 1.59E-01 | 1.71 | 4.16E-02 | 2.00 | 8.68E-01 | 0.86  |
| Bacteroides                     | p__Bacteroidetes;c__Bacteroidia;o__Bacteroidales;f__Bacteroidaceae;g__Bacteroides;         | 0.000246 | 0.000288 | 0.000144 | 3.48E-04 | 4.97E-02 | 7.87E-11 | 1.21E-01 | 1.71 | 2.27E-02 | 2.00 | 9.59E-01 | 0.86  |
| Bacteroidales<br>BS11 gut group | p__Bacteroidetes;c__Bacteroidia;o__Bacteroidales;f__Bacteroidales_BS11_gut_group;          | 0.000246 | 2.05E-05 | 4.11E-05 | 1.79E-02 | 1.23E-02 | 0        | 7.28E-01 | 6.00 | NA       | 0.50 | NA       | 12.02 |
| Bacteroidales<br>RF16 group     | p__Bacteroidetes;c__Bacteroidia;o__Bacteroidales;f__Bacteroidales_RF16_group;              | 7.19E-05 | 4.11E-05 | 6.16E-05 | 9.75E-01 | 9.72E-01 | 0        | NA       | 1.17 | NA       | 0.67 | NA       | 1.75  |
| Bacteroidales<br>S24-7 group    | p__Bacteroidetes;c__Bacteroidia;o__Bacteroidales;f__Bacteroidales_S24-7_group;             | 8.22E-05 | 6.16E-05 | 0.000103 | 8.31E-01 | 9.18E-01 | 4.32E-07 | 1        | 0.80 | 7.76E-01 | 0.60 | 8.68E-01 | 1.33  |
| Porphyromonadaceae              | p__Bacteroidetes;c__Bacteroidia;o__Bacteroidales;f__Porphyromonadaceae;                    | 0.012324 | 0.007107 | 0.006244 | 6.48E-04 | 2.07E-04 | 5.09E-01 | 1.40E-02 | 1.97 | 1        | 1.14 | 6.58E-01 | 1.73  |
| Odoribacter                     | p__Bacteroidetes;c__Bacteroidia;o__Bacteroidales;f__Porphyromonadaceae;g__Odoribacter;     | 4.11E-05 | 0        | 2.05E-05 | 1.59E-01 | 2.25E-01 | 0        | 2.39E-01 | 2.00 | NA       | NA   | NA       | NA    |
| Parabacteroides                 | p__Bacteroidetes;c__Bacteroidia;o__Bacteroidales;f__Porphyromonadaceae;g__Parabacteroides; | 4.11E-05 | 2.05E-05 | 4.11E-05 | 3.23E-01 | 8.86E-01 | 1        | 1        | 1.00 | 1        | 0.50 | 4.01E-01 | 2.00  |

|                                 |                                                                                                            |          |          |          |          |          |          |          |      |          |      |          |      |
|---------------------------------|------------------------------------------------------------------------------------------------------------|----------|----------|----------|----------|----------|----------|----------|------|----------|------|----------|------|
| Porphyromonas                   | p__Bacteroidetes;c__Bacteroidia;o__Bacteroidales;f__Porphyromonadaceae;g__Porphyromonas;                   | 0.012036 | 0.007004 | 0.005833 | 1.05E-03 | 3.71E-04 | 5.44E-01 | 2.99E-02 | 2.06 | 1        | 1.20 | 6.92E-01 | 1.72 |
| Tannerella                      | p__Bacteroidetes;c__Bacteroidia;o__Bacteroidales;f__Porphyromonadaceae;g__Tannerella;                      | 0.000298 | 0.000123 | 0.000144 | 5.31E-06 | 1.16E-03 | 1.34E-01 | 8.07E-02 | 2.07 | 1        | 0.86 | 1.14E-01 | 2.42 |
| unidentified Porphyromonadaceae | p__Bacteroidetes;c__Bacteroidia;o__Bacteroidales;f__Porphyromonadaceae;g__unidentified_Porphyromonadaceae; | 0.000134 | 4.11E-05 | 8.22E-05 | 8.86E-05 | 6.30E-03 | 1.91E-02 | 3.61E-02 | 1.62 | 1        | 0.50 | 2.53E-02 | 3.25 |
| Prevotellaceae                  | p__Bacteroidetes;c__Bacteroidia;o__Bacteroidales;f__Prevotellaceae;                                        | 0.029331 | 0.044017 | 0.013988 | 8.20E-05 | 7.85E-03 | 2.86E-04 | 1.40E-02 | 2.10 | 4.50E-02 | 3.15 | 3.19E-01 | 0.67 |
| Alloprevotella                  | p__Bacteroidetes;c__Bacteroidia;o__Bacteroidales;f__Prevotellaceae;g__Alloprevotella;                      | 0.002485 | 0.001992 | 0.001356 | 1.59E-01 | 8.60E-02 | 1        | 3.29E-01 | 1.83 | 7.68E-01 | 1.47 | 1        | 1.25 |
| Prevotella                      | p__Bacteroidetes;c__Bacteroidia;o__Bacteroidales;f__Prevotellaceae;g__Prevotella;                          | 0.005874 | 0.010496 | 0.003143 | 2.18E-06 | 9.06E-03 | 1.52E-07 | 3.18E-01 | 1.87 | 3.70E-03 | 3.34 | 1.43E-01 | 0.56 |
| Prevotella 1                    | p__Bacteroidetes;c__Bacteroidia;o__Bacteroidales;f__Prevotellaceae;g__Prevotella_1;                        | 0.000113 | 4.11E-05 | 2.05E-05 | 1.28E-01 | 6.07E-02 | 0        | 5.60E-01 | 5.51 | NA       | 2.00 | NA       | 2.75 |

|                             |                                                                                                    |          |          |          |          |          |          |          |      |          |      |          |      |
|-----------------------------|----------------------------------------------------------------------------------------------------|----------|----------|----------|----------|----------|----------|----------|------|----------|------|----------|------|
| Prevotella 2                | p__Bacteroidetes;c__Bacteroidia;o__Bacteroidales;f__Prevotellaceae;g__Prevotella_2;                | 0.00037  | 0.000401 | 0.000277 | 1.58E-01 | 4.67E-01 | 2.56E-02 | 9.65E-01 | 1.33 | 3.62E-01 | 1.44 | 1        | 0.92 |
| Prevotella 6                | p__Bacteroidetes;c__Bacteroidia;o__Bacteroidales;f__Prevotellaceae;g__Prevotella_6;                | 0.001232 | 0.001222 | 0.00076  | 1.51E-01 | 4.40E-01 | 4.40E-01 | 2.22E-01 | 1.62 | 4.78E-01 | 1.61 | 9.91E-01 | 1.01 |
| Prevotella 7                | p__Bacteroidetes;c__Bacteroidia;o__Bacteroidales;f__Prevotellaceae;g__Prevotella_7;                | 0.014111 | 0.020622 | 0.005833 | 4.93E-05 | 1.21E-02 | 3.42E-05 | 2.88E-02 | 2.42 | 3.79E-01 | 3.54 | 8.63E-01 | 0.68 |
| Prevotella 9                | p__Bacteroidetes;c__Bacteroidia;o__Bacteroidales;f__Prevotellaceae;g__Prevotella_9;                | 4.11E-05 | 5.14E-05 | 4.11E-05 | 3.12E-01 | 2.49E-01 | 1.56E-01 | 7.51E-01 | 1.00 | 1        | 1.25 | 1.86E-01 | 0.80 |
| Prevotellaceae UCG-003      | p__Bacteroidetes;c__Bacteroidia;o__Bacteroidales;f__Prevotellaceae;g__Prevotellaceae_UCG-003;      | 0.000123 | 0        | 2.05E-05 | 7.26E-02 | 9.95E-02 | 0        | 5.31E-01 | 6.01 | NA       | NA   | NA       | NA   |
| Prevotellaceae UCG-004      | p__Bacteroidetes;c__Bacteroidia;o__Bacteroidales;f__Prevotellaceae;g__Prevotellaceae_UCG-004;      | 6.16E-05 | 2.05E-05 | 3.08E-05 | 3.24E-03 | 2.87E-03 | 0        | 2.32E-02 | 2.00 | 1        | 0.67 | 4.56E-01 | 3.00 |
| unidentified Prevotellaceae | p__Bacteroidetes;c__Bacteroidia;o__Bacteroidales;f__Prevotellaceae;g__unidentified_Prevotellaceae; | 4.11E-05 | 2.05E-05 | 4.11E-05 | 3.62E-01 | 9.93E-01 | 1        | 1        | 1.00 | 3.62E-01 | 0.50 | 4.01E-01 | 2.00 |



|                                |                                                                                                   |          |          |          |          |          |          |          |      |          |      |          |      |
|--------------------------------|---------------------------------------------------------------------------------------------------|----------|----------|----------|----------|----------|----------|----------|------|----------|------|----------|------|
| Rikenellaceae                  | p__Bacteroidetes;c__Bacteroidia;o__Bacteroidales;f__Rikenellaceae;                                | 0.000123 | 4.11E-05 | 0.000103 | 4.14E-06 | 2.53E-01 | 1.80E-02 | 1        | 1.20 | 2.57E-01 | 0.40 | 1.97E-01 | 3.00 |
| Alistipes                      | p__Bacteroidetes;c__Bacteroidia;o__Bacteroidales;f__Rikenellaceae;g__Alistipes;                   | 5.14E-05 | 2.05E-05 | 6.16E-05 | 1.10E-02 | 5.15E-01 | 1        | 1        | 0.83 | 6.48E-01 | 0.33 | 1.39E-01 | 2.50 |
| Rikenellaceae<br>RC9 gut group | p__Bacteroidetes;c__Bacteroidia;o__Bacteroidales;f__Rikenellaceae;g__Rikenellaceae_RC9_gut_group; | 0.000113 | 4.11E-05 | 6.16E-05 | 1.92E-03 | 1.06E-01 | 1.07E-03 | 1.76E-01 | 1.83 | 9.96E-01 | 0.67 | 7.40E-01 | 2.75 |
| unidentified<br>Bacteroidales  | p__Bacteroidetes;c__Bacteroidia;o__Bacteroidales;f__unidentified_Bacteroidales;                   | 0.000123 | 3.08E-05 | 0.000103 | 9.90E-03 | 8.99E-01 | 4.32E-04 | 1        | 1.20 | 7.76E-01 | 0.30 | 6.19E-01 | 4.00 |
| Phocaeicola                    | p__Bacteroidetes;c__Bacteroidia;o__Bacteroidales;f__unidentified_Bacteroidales;g__Phocaeicola;    | 0.000123 | 3.08E-05 | 0.000103 | 9.32E-03 | 8.91E-01 | 6.35E-04 | 1        | 1.20 | 7.69E-01 | 0.30 | 7.41E-01 | 4.00 |
| Cytophagia                     | p__Bacteroidetes;c__Cytophagia;                                                                   | 0.000123 | 4.11E-05 | 5.14E-05 | 3.06E-02 | 7.51E-02 | 3.12E-04 | 7.76E-02 | 2.40 | 1        | 0.80 | 2.47E-01 | 3.00 |
| Cytophagales                   | p__Bacteroidetes;c__Cytophagia;o__Cytophagales;                                                   | 0.000103 | 4.11E-05 | 4.11E-05 | 4.19E-02 | 7.84E-02 | 1.71E-04 | 1.96E-01 | 2.50 | 1        | 1.00 | 6.41E-01 | 2.50 |
| Cytophagaceae                  | p__Bacteroidetes;c__Cytophagia;o__Cytophagales;f__Cytophagaceae;                                  | 0.000103 | 4.11E-05 | 4.11E-05 | 4.39E-02 | 7.30E-02 | 5.61E-04 | 8.12E-02 | 2.50 | 1        | 1.00 | 3.46E-01 | 2.50 |

|                   |                                                                                                  |          |          |          |          |          |          |          |      |          |      |          |      |
|-------------------|--------------------------------------------------------------------------------------------------|----------|----------|----------|----------|----------|----------|----------|------|----------|------|----------|------|
| Fibrella          | p__Bacteroidetes;c__Cytophagia;o__Cytophagales;f__Cytophagaceae;g__Fibrella;                     | 6.16E-05 | 4.11E-05 | 4.11E-05 | 7.79E-01 | 5.41E-01 | 0        | 8.02E-01 | 1.50 | 1        | 1.00 | 9.59E-01 | 1.50 |
| Flavobacteriia    | p__Bacteroidetes;c__Flavobacteriia;                                                              | 0.003369 | 0.004046 | 0.003666 | 5.39E-01 | 5.68E-01 | 1        | 9.36E-01 | 0.92 | 1        | 1.10 | 9.24E-01 | 0.83 |
| Flavobacteriales  | p__Bacteroidetes;c__Flavobacteriia;o__Flavobacteriales;                                          | 0.003369 | 0.004046 | 0.003666 | 4.77E-01 | 5.44E-01 | 1        | 9.29E-01 | 0.92 | 1        | 1.10 | 8.82E-01 | 0.83 |
| Flavobacteriaceae | p__Bacteroidetes;c__Flavobacteriia;o__Flavobacteriales;f__Flavobacteriaceae;                     | 0.003369 | 0.003985 | 0.003646 | 4.72E-01 | 5.15E-01 | 1        | 1        | 0.92 | 1        | 1.09 | 8.68E-01 | 0.85 |
| Bergeyella        | p__Bacteroidetes;c__Flavobacteriia;o__Flavobacteriales;f__Flavobacteriaceae;g__Bergeyella;       | 0.000411 | 0.000277 | 0.000298 | 2.39E-02 | 1.05E-01 | 1        | 2.02E-01 | 1.38 | 7.69E-01 | 0.93 | 2.73E-02 | 1.48 |
| Capnocytophaga    | p__Bacteroidetes;c__Flavobacteriia;o__Flavobacteriales;f__Flavobacteriaceae;g__Capnocytophaga;   | 0.001951 | 0.002177 | 0.001273 | 1.52E-02 | 6.07E-02 | 1        | 6.92E-02 | 1.53 | 1        | 1.71 | 1        | 0.90 |
| Chryseobacterium  | p__Bacteroidetes;c__Flavobacteriia;o__Flavobacteriales;f__Flavobacteriaceae;g__Chryseobacterium; | 0.000226 | 0.000144 | 0.000688 | 3.14E-04 | 1.46E-03 | 2.30E-01 | 7.24E-02 | 0.33 | 2.65E-01 | 0.21 | 1        | 1.57 |
| Flavobacterium    | p__Bacteroidetes;c__Flavobacteriia;o__Flavobacteriales;f__Flavobacteriaceae;g__Flavobacterium;   | 7.19E-05 | 4.11E-05 | 0.000411 | 1.98E-01 | 1.06E-01 | 1.63E-03 | 5.21E-01 | 0.18 | 1        | 0.10 | 1        | 1.75 |

|                     |                                                                                                   |          |          |          |          |          |          |          |      |    |       |          |      |
|---------------------|---------------------------------------------------------------------------------------------------|----------|----------|----------|----------|----------|----------|----------|------|----|-------|----------|------|
| Sphingobacteria     | p__Bacteroidetes;c__Sphingobacteria;                                                              | 0.000185 | 0.000195 | 0.000185 | 6.00E-01 | 8.34E-01 | 1        | 9.22E-01 | 1.00 | 1  | 1.06  | 1        | 0.95 |
| Sphingobacteriales  | p__Bacteroidetes;c__Sphingobacteria;o__Sphingobacteriales;                                        | 0.000185 | 0.000195 | 0.000185 | 5.57E-01 | 8.59E-01 | 1        | 8.71E-01 | 1.00 | 1  | 1.06  | 8.71E-01 | 0.95 |
| Chitinophagaceae    | p__Bacteroidetes;c__Sphingobacteria;o__Sphingobacteriales;f__Chitinophagaceae;                    | 0.000103 | 4.11E-05 | 4.11E-05 | 2.28E-03 | 2.51E-03 | 1.68E-01 | 2.86E-02 | 2.50 | 1  | 1.00  | 1        | 2.50 |
| Flavisolibacter     | p__Bacteroidetes;c__Sphingobacteria;o__Sphingobacteriales;f__Chitinophagaceae;g__Flavisolibacter; | 5.14E-05 | 2.05E-05 | 4.11E-05 | 4.40E-01 | 9.40E-01 | 0        | 1        | 1.25 | NA | 0.50  | NA       | 2.50 |
| Terrimonas          | p__Bacteroidetes;c__Sphingobacteria;o__Sphingobacteriales;f__Chitinophagaceae;g__Terrimonas;      | 8.22E-05 | 4.11E-05 | 6.16E-05 | 1.51E-01 | 1.96E-01 | 1        | 1        | 1.33 | 1  | 0.67  | 9.89E-01 | 2.00 |
| Saprospiraceae      | p__Bacteroidetes;c__Sphingobacteria;o__Sphingobacteriales;f__Saprospiraceae;                      | 2.05E-05 | 0.002403 | 3.08E-05 | 2.84E-01 | 8.97E-01 | 0        | 1        | 0.67 | NA | 78.02 | NA       | 0.01 |
| Sphingobacteriaceae | p__Bacteroidetes;c__Sphingobacteria;o__Sphingobacteriales;f__Sphingobacteriaceae;                 | 8.22E-05 | 0.000205 | 0.000144 | 1.74E-01 | 8.65E-02 | 1        | 4.85E-01 | 0.57 | 1  | 1.43  | 8.55E-01 | 0.40 |
| Nubsella            | p__Bacteroidetes;c__Sphingobacteria;o__Sphingobacteriales;f__Sphingobacteriaceae;g__Nubsella;     | 2.05E-05 | 2.05E-05 | 0.000154 | 4.35E-02 | 3.63E-02 | 9.32E-02 | 1        | 0.13 | 1  | 0.13  | 1        | 1.00 |

|                                     |                                                                                                              |          |          |          |          |          |          |          |      |   |      |          |      |
|-------------------------------------|--------------------------------------------------------------------------------------------------------------|----------|----------|----------|----------|----------|----------|----------|------|---|------|----------|------|
| Sphingobacterium                    | p__Bacteroidetes;c__Sphingobacteriia;o__Sphingobacteriales;f__Sphingobacteriaceae;g__Sphingobacterium;       | 6.16E-05 | 0.000205 | 0.000154 | 2.37E-02 | 1.15E-02 | 1        | 5.32E-01 | 0.40 | 1 | 1.33 | 9.59E-01 | 0.30 |
| WCHB1-69                            | p__Bacteroidetes;c__Sphingobacteriia;o__Sphingobacteriales;f__WCHB1-69;                                      | 4.11E-05 | 4.11E-05 | 6.16E-05 | 1.01E-01 | 8.19E-02 | 6.46E-01 | 1.45E-01 | 0.67 | 1 | 0.67 | 9.55E-01 | 1.00 |
| unidentified WCHB1-69               | p__Bacteroidetes;c__Sphingobacteriia;o__Sphingobacteriales;f__WCHB1-69;g__unidentified_WCHB1-69;             | 4.11E-05 | 4.11E-05 | 6.16E-05 | 1.04E-01 | 6.79E-02 | 1        | 8.07E-02 | 0.67 | 1 | 0.67 | 9.91E-01 | 1.00 |
| Candidate division SR1              | p__Candidate_division_SR1;                                                                                   | 0.00154  | 0.002362 | 0.00151  | 2.57E-01 | 5.25E-01 | 1        | 8.81E-01 | 1.02 | 1 | 1.56 | 6.88E-02 | 0.65 |
| unidentified Candidate division SR1 | p__Candidate_division_SR1;c__unidentified_Candidate_division_SR1;                                            | 0.00154  | 0.002362 | 0.00151  | 2.97E-01 | 6.04E-01 | 1        | 9.22E-01 | 1.02 | 1 | 1.56 | 1.13E-01 | 0.65 |
| unidentified Candidate division SR1 | p__Candidate_division_SR1;c__unidentified_Candidate_division_SR1;o__unidentified_Candidate_division_SR1;     | 0.00154  | 0.002362 | 0.00151  | 2.76E-01 | 6.43E-01 | 1        | 9.29E-01 | 1.02 | 1 | 1.56 | 1.24E-01 | 0.65 |
| unidentified Candidate division SR1 | p__Candidate_division_SR1;c__unidentified_Candidate_division_SR1;o__unidentified_Candidate_division_SR1;f__u | 0.00154  | 0.002362 | 0.00151  | 2.68E-01 | 6.46E-01 | 1        | 1        | 1.02 | 1 | 1.56 | 1.18E-01 | 0.65 |

|                                     |                                                                                                                                                                                        |          |          |          |          |          |          |          |      |          |      |          |      |
|-------------------------------------|----------------------------------------------------------------------------------------------------------------------------------------------------------------------------------------|----------|----------|----------|----------|----------|----------|----------|------|----------|------|----------|------|
|                                     | nidentified_Candidate_division_SR1;                                                                                                                                                    |          |          |          |          |          |          |          |      |          |      |          |      |
| unidentified Candidate division SR1 | p__Candidate_division_SR1;c__unidentified_Candidate_division_SR1;o__unidentified_Candidate_division_SR1;f__unidentified_Candidate_division_SR1;g__unidentified_Candidate_division_SR1; | 0.00154  | 0.002362 | 0.00151  | 2.55E-01 | 5.72E-01 | 1        | 9.53E-01 | 1.02 | 1        | 1.56 | 1.15E-01 | 0.65 |
| Chlorobi                            | p__Chlorobi;                                                                                                                                                                           | 4.11E-05 | 0.000298 | 4.11E-05 | 8.05E-01 | 6.22E-01 | 0        | 9.75E-01 | 1.00 | 3.35E-01 | 7.25 | 1        | 0.14 |
| Chlorobia                           | p__Chlorobi;c__Chlorobia;                                                                                                                                                              | 4.11E-05 | 0.000277 | 4.11E-05 | 9.09E-01 | 9.80E-01 | 0        | 1        | 1.00 | 1        | 6.75 | 1        | 0.15 |
| Chlorobiales                        | p__Chlorobi;c__Chlorobia;o__Chlorobiales;                                                                                                                                              | 4.11E-05 | 0.000277 | 4.11E-05 | 9.37E-01 | 9.91E-01 | 0        | 1        | 1.00 | 1        | 6.75 | 1        | 0.15 |
| Ignavibacteria                      | p__Chlorobi;c__Ignavibacteria;                                                                                                                                                         | 2.05E-05 | 4.11E-05 | 0.000113 | 6.00E-01 | 5.00E-01 | 0        | 1        | 0.18 | NA       | 0.36 | NA       | 0.50 |
| Ignavibacteriales                   | p__Chlorobi;c__Ignavibacteria;o__Ignavibacteriales;                                                                                                                                    | 2.05E-05 | 4.11E-05 | 0.000113 | 5.85E-01 | 4.63E-01 | 0        | 1        | 0.18 | NA       | 0.36 | NA       | 0.50 |
| Chloroflexi                         | p__Chloroflexi;                                                                                                                                                                        | 8.22E-05 | 4.11E-05 | 4.11E-05 | 2.57E-01 | 4.26E-01 | 1.48E-03 | 8.81E-01 | 2.00 | 1        | 1.00 | 9.31E-02 | 2.00 |
| Anaerolineae                        | p__Chloroflexi;c__Anaerolineae;                                                                                                                                                        | 4.11E-05 | 2.05E-05 | 2.05E-05 | 6.00E-01 | 6.04E-01 | 1        | 1        | 2.00 | 1        | 1.00 | 9.24E-01 | 2.00 |
| Anaerolineales                      | p__Chloroflexi;c__Anaerolineae;o__Anaerolineales;                                                                                                                                      | 4.11E-05 | 2.05E-05 | 2.05E-05 | 5.85E-01 | 6.28E-01 | 1        | 1        | 2.00 | 1        | 1.00 | 8.71E-01 | 2.00 |
| Anaerolineaceae                     | p__Chloroflexi;c__Anaerolineae;o__Anaerolineales;f__Anaerolineaceae;                                                                                                                   | 4.11E-05 | 2.05E-05 | 2.05E-05 | 5.90E-01 | 6.18E-01 | 1        | 1        | 2.00 | 1        | 1.00 | 8.35E-01 | 2.00 |

|                    |                                                                                    |          |          |          |          |          |          |          |      |          |      |          |      |
|--------------------|------------------------------------------------------------------------------------|----------|----------|----------|----------|----------|----------|----------|------|----------|------|----------|------|
| Chloroflexia       | p__Chloroflexi;c__Chloroflexia;                                                    | 9.24E-05 | 0        | 4.11E-05 | 6.00E-01 | 6.25E-01 | 0        | 9.96E-01 | 2.25 | NA       | NA   | NA       | NA   |
| Chloroflexales     | p__Chloroflexi;c__Chloroflexia;o__Chloroflexales;                                  | 8.22E-05 | 0        | 4.11E-05 | 6.43E-01 | 7.61E-01 | 0        | 1        | 2.00 | NA       | NA   | NA       | NA   |
| Roseiflexaceae     | p__Chloroflexi;c__Chloroflexia;o__Chloroflexales;f__Roseiflexaceae;                | 8.22E-05 | 0        | 4.11E-05 | 6.54E-01 | 7.37E-01 | 0        | 1        | 2.00 | NA       | NA   | NA       | NA   |
| Roseiflexus        | p__Chloroflexi;c__Chloroflexia;o__Chloroflexales;f__Roseiflexaceae;g__Roseiflexus; | 8.22E-05 | 0        | 4.11E-05 | 6.53E-01 | 7.00E-01 | 0        | 1        | 2.00 | NA       | NA   | NA       | NA   |
| JG37-AG-4          | p__Chloroflexi;c__JG37-AG-4;                                                       | 4.11E-05 | 3.08E-05 | 4.11E-05 | 2.79E-01 | 4.40E-01 | 1        | 9.95E-01 | 1.00 | 1        | 0.75 | 1        | 1.33 |
| KD4-96             | p__Chloroflexi;c__KD4-96;                                                          | 5.14E-05 | 4.11E-05 | 5.14E-05 | 6.00E-01 | 9.80E-01 | 1        | 1        | 1.00 | 1        | 0.80 | 1        | 1.25 |
| Ktedonobacteria    | p__Chloroflexi;c__Ktedonobacteria;                                                 | 4.11E-05 | 3.08E-05 | 0.000103 | 5.60E-01 | 8.83E-01 | 1        | 1        | 0.40 | 1        | 0.30 | 1        | 1.33 |
| JG30-KF-AS9        | p__Chloroflexi;c__Ktedonobacteria;o__JG30-KF-AS9;                                  | 6.16E-05 | 2.05E-05 | 9.24E-05 | 5.40E-01 | 8.92E-01 | 0        | 1        | 0.67 | NA       | 0.22 | NA       | 3.00 |
| Ktedonobacteriales | p__Chloroflexi;c__Ktedonobacteria;o__Ktedonobacteriales;                           | 2.05E-05 | 6.17E-05 | 2.05E-05 | 8.13E-01 | 8.32E-01 | 2.58E-01 | 1        | 1.00 | 7.43E-01 | 3.01 | 1        | 0.33 |
| S085               | p__Chloroflexi;c__S085;                                                            | 4.11E-05 | 2.05E-05 | 9.24E-05 | 2.33E-01 | 2.78E-01 | 0        | 9.96E-01 | 0.44 | NA       | 0.22 | NA       | 2.00 |
| TK10               | p__Chloroflexi;c__TK10;                                                            | 4.11E-05 | 3.08E-05 | 3.08E-05 | 6.00E-01 | 5.77E-01 | 1        | 1        | 1.33 | 9.92E-01 | 1.00 | 1        | 1.33 |
| Cyanobacteria      | p__Cyanobacteria;                                                                  | 0.000123 | 6.16E-05 | 6.16E-05 | 1.25E-01 | 1.22E-01 | 3.73E-01 | 1.15E-02 | 2.00 | 1        | 1.00 | 9.31E-02 | 2.00 |
| Chloroplast        | p__Cyanobacteria;c__Chloroplast;                                                   | 8.22E-05 | 5.14E-05 | 6.16E-05 | 3.35E-01 | 2.46E-01 | 4.51E-01 | 2.33E-01 | 1.33 | 1        | 0.83 | 9.84E-01 | 1.60 |

|                            |                                                                                                                      |          |          |          |          |          |          |          |      |          |      |          |      |
|----------------------------|----------------------------------------------------------------------------------------------------------------------|----------|----------|----------|----------|----------|----------|----------|------|----------|------|----------|------|
| unidentified Chloroplast   | p__Cyanobacteria;c__Chloroplast;o__unidentified_Chloroplast;                                                         | 8.22E-05 | 5.14E-05 | 6.16E-05 | 3.24E-01 | 2.66E-01 | 4.12E-01 | 2.41E-01 | 1.33 | 1        | 0.83 | 7.91E-01 | 1.60 |
| unidentified Chloroplast   | p__Cyanobacteria;c__Chloroplast;o__unidentified_Chloroplast;f__unidentified_Chloroplast;                             | 8.22E-05 | 5.14E-05 | 6.16E-05 | 3.30E-01 | 2.80E-01 | 1        | 2.42E-01 | 1.33 | 1        | 0.83 | 7.06E-01 | 1.60 |
| unidentified Chloroplast   | p__Cyanobacteria;c__Chloroplast;o__unidentified_Chloroplast;f__unidentified_Chloroplast;g__unidentified_Chloroplast; | 8.22E-05 | 5.14E-05 | 6.16E-05 | 3.14E-01 | 2.41E-01 | 1        | 2.42E-01 | 1.33 | 1        | 0.83 | 8.63E-01 | 1.60 |
| Melainabacteria            | p__Cyanobacteria;c__Melainabacteria;                                                                                 | 4.11E-05 | 4.11E-05 | 4.11E-05 | 6.29E-01 | 6.14E-01 | 1        | 1        | 1.00 | 1        | 1.00 | 1        | 1.00 |
| Obscuribacterales          | p__Cyanobacteria;c__Melainabacteria;o__Obscuribacterales;                                                            | 4.11E-05 | 5.14E-05 | 3.08E-05 | 4.29E-01 | 9.80E-01 | 1        | 1        | 1.33 | 1        | 1.67 | 7.91E-01 | 0.80 |
| unidentified Cyanobacteria | p__Cyanobacteria;c__unidentified_Cyanobacteria;                                                                      | 0.000246 | 6.16E-05 | 0.000185 | 6.29E-01 | 9.80E-01 | 0        | 1        | 1.33 | NA       | 0.33 | NA       | 4.00 |
| Deinococcus-Thermus        | p__Deinococcus-Thermus;                                                                                              | 4.11E-05 | 6.16E-05 | 4.11E-05 | 3.60E-01 | 5.25E-01 | 1        | 1.00E+00 | 1.00 | 1        | 1.50 | 7.27E-01 | 0.67 |
| Deinococci                 | p__Deinococcus-Thermus;c__Deinococci;                                                                                | 4.11E-05 | 6.16E-05 | 4.11E-05 | 4.27E-01 | 6.04E-01 | 1        | 1        | 1.00 | 1        | 1.50 | 9.24E-01 | 0.67 |
| Deinococcales              | p__Deinococcus-Thermus;c__Deinococci;o__Deinococcales;                                                               | 4.11E-05 | 6.16E-05 | 4.11E-05 | 3.18E-01 | 7.99E-01 | 1        | 1        | 1.00 | 9.60E-01 | 1.50 | 9.48E-01 | 0.67 |

|                     |                                                                                                     |          |          |          |          |          |          |          |      |          |      |          |      |
|---------------------|-----------------------------------------------------------------------------------------------------|----------|----------|----------|----------|----------|----------|----------|------|----------|------|----------|------|
| Deinococcaceae      | p__Deinococcus-<br>Thermus;c__Deinococci;o__<br>Deinococcales;f__Deinococca<br>ceae;                | 4.11E-05 | 6.16E-05 | 2.05E-05 | 1.87E-01 | 8.67E-01 | 1        | 1.56E-01 | 2.00 | 1        | 3.00 | 9.74E-01 | 0.67 |
| Deinococcus         | p__Deinococcus-<br>Thermus;c__Deinococci;o__<br>Deinococcales;f__Deinococca<br>ceae;g__Deinococcus; | 4.11E-05 | 6.16E-05 | 2.05E-05 | 1.73E-01 | 8.56E-01 | 1        | 1.76E-01 | 2.00 | 1        | 3.00 | 9.91E-01 | 0.67 |
| Fibrobacteres       | p__Fibrobacteres;                                                                                   | 0.000329 | 0        | 4.11E-05 | 8.77E-03 | 1.21E-02 | 0        | 1.46E-01 | 8.00 | NA       | NA   | NA       | NA   |
| Fibrobacteria       | p__Fibrobacteres;c__Fibroba<br>cteria;                                                              | 0.000329 | 0        | 4.11E-05 | 1.03E-02 | 1.37E-02 | 0        | 4.68E-01 | 8.00 | NA       | NA   | NA       | NA   |
| Fibrobacterales     | p__Fibrobacteres;c__Fibroba<br>cteria;o__Fibrobacterales;                                           | 0.000329 | 0        | 4.11E-05 | 3.64E-02 | 5.70E-02 | 0        | 7.12E-01 | 8.00 | NA       | NA   | NA       | NA   |
| Firmicutes          | p__Firmicutes;                                                                                      | 0.391098 | 0.314423 | 0.240521 | 1.41E-05 | 3.54E-06 | 1.75E-02 | 1.58E-03 | 1.63 | 7.01E-02 | 1.31 | 5.56E-01 | 1.24 |
| Bacilli             | p__Firmicutes;c__Bacilli;                                                                           | 0.187159 | 0.13431  | 0.133108 | 2.29E-02 | 9.43E-03 | 1        | 2.52E-01 | 1.41 | 1        | 1.01 | 5.49E-01 | 1.39 |
| Bacillales          | p__Firmicutes;c__Bacilli;o__<br>Bacillales;                                                         | 0.01561  | 0.009982 | 0.00876  | 6.59E-06 | 2.33E-06 | 4.60E-06 | 4.20E-04 | 1.78 | 7.43E-01 | 1.14 | 3.08E-01 | 1.56 |
| Alicyclobacillaceae | p__Firmicutes;c__Bacilli;o__<br>Bacillales;f__Alicyclobacillac<br>eae;                              | 4.11E-05 | 4.11E-05 | 5.14E-05 | 2.56E-01 | 3.73E-01 | 9.11E-01 | 1        | 0.80 | 1        | 0.80 | 1        | 1.00 |
| Bacillaceae         | p__Firmicutes;c__Bacilli;o__<br>Bacillales;f__Bacillaceae;                                          | 0.003985 | 0.000657 | 0.000955 | 3.93E-08 | 1.19E-05 | 6.39E-10 | 5.76E-08 | 4.17 | 7.76E-01 | 0.69 | 2.38E-06 | 6.06 |
| Anoxybacillus       | p__Firmicutes;c__Bacilli;o__<br>Bacillales;f__Bacillaceae;g__<br>Anoxybacillus;                     | 0.003451 | 0.000575 | 0.000811 | 7.42E-08 | 2.53E-05 | 1.39E-08 | 1.27E-04 | 4.25 | 5.54E-01 | 0.71 | 4.74E-05 | 6.00 |



|                  |                                                                                      |          |          |          |          |          |          |          |      |          |      |          |      |
|------------------|--------------------------------------------------------------------------------------|----------|----------|----------|----------|----------|----------|----------|------|----------|------|----------|------|
| Bacillus         | p__Firmicutes;c__Bacilli;o__<br>Bacillales;f__Bacillaceae;g__<br>Bacillus;           | 0.000103 | 6.16E-05 | 6.16E-05 | 1.14E-01 | 5.51E-02 | 1        | 2.38E-01 | 1.67 | 1        | 1.00 | 1        | 1.67 |
| Geobacillus      | p__Firmicutes;c__Bacilli;o__<br>Bacillales;f__Bacillaceae;g__<br>Geobacillus;        | 0.000164 | 4.11E-05 | 6.16E-05 | 5.60E-08 | 3.20E-05 | 1.54E-06 | 4.48E-02 | 2.67 | 7.29E-01 | 0.67 | 8.04E-03 | 4.00 |
| Family XI        | p__Firmicutes;c__Bacilli;o__<br>Bacillales;f__Family_XI;                             | 0.007743 | 0.007168 | 0.005494 | 5.49E-02 | 3.17E-02 | 1        | 2.85E-01 | 1.41 | 8.43E-01 | 1.30 | 1        | 1.08 |
| Gemella          | p__Firmicutes;c__Bacilli;o__<br>Bacillales;f__Family_XI;g__<br>Gemella;              | 0.007743 | 0.007168 | 0.005494 | 5.17E-02 | 2.75E-02 | 1        | 2.32E-01 | 1.41 | 7.68E-01 | 1.30 | 1        | 1.08 |
| Family XII       | p__Firmicutes;c__Bacilli;o__<br>Bacillales;f__Family_XII;                            | 4.11E-05 | 2.05E-05 | 6.16E-05 | 4.31E-02 | 7.07E-01 | 1        | 9.35E-01 | 0.67 | 9.49E-01 | 0.33 | 6.58E-01 | 2.00 |
| Exiguobacterium  | p__Firmicutes;c__Bacilli;o__<br>Bacillales;f__Family_XII;g__<br>Exiguobacterium;     | 4.11E-05 | 2.05E-05 | 6.16E-05 | 3.82E-02 | 6.58E-01 | 1        | 7.88E-01 | 0.67 | 9.47E-01 | 0.33 | 7.41E-01 | 2.00 |
| Paenibacillaceae | p__Firmicutes;c__Bacilli;o__<br>Bacillales;f__Paenibacillaceae;                      | 0.001232 | 0.000164 | 0.000308 | 3.93E-08 | 1.95E-05 | 1.57E-11 | 1.62E-08 | 4.00 | 2.69E-01 | 0.53 | 1.75E-05 | 7.50 |
| Brevibacillus    | p__Firmicutes;c__Bacilli;o__<br>Bacillales;f__Paenibacillaceae;g__<br>Brevibacillus; | 0.000452 | 8.22E-05 | 0.000103 | 5.87E-08 | 7.88E-06 | 1.13E-06 | 1.81E-13 | 4.40 | 9.96E-01 | 0.80 | 1.73E-09 | 5.50 |
| Paenibacillus    | p__Firmicutes;c__Bacilli;o__<br>Bacillales;f__Paenibacillaceae;g__<br>Paenibacillus; | 0.000698 | 8.22E-05 | 0.000246 | 6.32E-08 | 3.67E-04 | 8.65E-12 | 1.66E-04 | 2.83 | 6.94E-03 | 0.33 | 2.88E-04 | 8.50 |

|                           |                                                                                                |          |          |          |          |          |          |          |      |          |       |          |      |
|---------------------------|------------------------------------------------------------------------------------------------|----------|----------|----------|----------|----------|----------|----------|------|----------|-------|----------|------|
| Planococcaceae            | p__Firmicutes;c__Bacilli;o__<br>Bacillales;f__Planococcaceae;                                  | 9.24E-05 | 0.000277 | 6.16E-05 | 3.28E-01 | 2.80E-01 | 1        | 1        | 1.50 | 1        | 4.50  | 1        | 0.33 |
| Chryseomicrobi<br>um      | p__Firmicutes;c__Bacilli;o__<br>Bacillales;f__Planococcaceae;<br>g__Chryseomicrobium;          | 4.11E-05 | 4.11E-05 | 4.11E-05 | 9.61E-01 | 9.81E-01 | 1        | 1        | 1.00 | 1        | 1.00  | 1        | 1.00 |
| Kurthia                   | p__Firmicutes;c__Bacilli;o__<br>Bacillales;f__Planococcaceae;<br>g__Kurthia;                   | 9.24E-05 | 0.000616 | 4.11E-05 | 3.13E-01 | 2.67E-01 | 2.58E-01 | 1        | 2.25 | 1        | 14.99 | 1        | 0.15 |
| Sporosarcina              | p__Firmicutes;c__Bacilli;o__<br>Bacillales;f__Planococcaceae;<br>g__Sporosarcina;              | 4.11E-05 | 2.05E-05 | 4.11E-05 | 3.39E-01 | 4.55E-01 | 1        | 1        | 1.00 | 7.68E-01 | 0.50  | 1        | 2.00 |
| Sporolactobacill<br>aceae | p__Firmicutes;c__Bacilli;o__<br>Bacillales;f__Sporolactobacill<br>aceae;                       | 8.22E-05 | 4.11E-05 | 6.16E-05 | 1.31E-01 | 9.83E-01 | 3.02E-01 | 8.06E-01 | 1.33 | 1        | 0.67  | 1        | 2.00 |
| Sporolactobacill<br>us    | p__Firmicutes;c__Bacilli;o__<br>Bacillales;f__Sporolactobacill<br>aceae;g__Sporolactobacillus; | 4.11E-05 | 4.11E-05 | 7.19E-05 | 1.59E-01 | 4.66E-01 | 3.03E-01 | 9.61E-01 | 0.57 | 1        | 0.57  | 1        | 1.00 |
| Staphylococcac<br>eae     | p__Firmicutes;c__Bacilli;o__<br>Bacillales;f__Staphylococcac<br>eae;                           | 0.000164 | 0.000103 | 0.000103 | 2.68E-02 | 1.49E-02 | 1        | 5.92E-02 | 1.60 | 1        | 1.00  | 9.74E-01 | 1.60 |
| Staphylococcus            | p__Firmicutes;c__Bacilli;o__<br>Bacillales;f__Staphylococcac<br>eae;g__Staphylococcus;         | 0.000144 | 0.000103 | 8.22E-05 | 2.91E-02 | 1.47E-02 | 1        | 4.78E-02 | 1.75 | 1        | 1.25  | 1        | 1.40 |
| Lactobacillales           | p__Firmicutes;c__Bacilli;o__<br>Lactobacillales;                                               | 0.163291 | 0.111572 | 0.119357 | 3.66E-02 | 2.51E-02 | 1        | 3.64E-01 | 1.37 | 1        | 0.93  | 3.87E-01 | 1.46 |

|                   |                                                                                             |          |          |          |          |          |          |          |      |          |      |          |      |
|-------------------|---------------------------------------------------------------------------------------------|----------|----------|----------|----------|----------|----------|----------|------|----------|------|----------|------|
| Aerococcaceae     | p__Firmicutes;c__Bacilli;o__<br>Lactobacillales;f__Aerococca<br>ceae;                       | 0.001397 | 0.001766 | 0.000883 | 3.90E-03 | 9.14E-02 | 9.64E-01 | 2.92E-01 | 1.58 | 5.29E-01 | 2.00 | 7.92E-01 | 0.79 |
| Abiotrophia       | p__Firmicutes;c__Bacilli;o__<br>Lactobacillales;f__Aerococca<br>ceae;g__Abiotrophia;        | 0.001397 | 0.001766 | 0.000883 | 3.65E-03 | 7.14E-02 | 9.40E-01 | 3.40E-01 | 1.58 | 5.16E-01 | 2.00 | 8.45E-01 | 0.79 |
| Carnobacteriaceae | p__Firmicutes;c__Bacilli;o__<br>Lactobacillales;f__Carnobact<br>eriaceae;                   | 0.017315 | 0.011626 | 0.011102 | 3.46E-04 | 1.57E-04 | 5.43E-01 | 1.76E-02 | 1.56 | 1        | 1.05 | 5.60E-01 | 1.49 |
| Atopostipes       | p__Firmicutes;c__Bacilli;o__<br>Lactobacillales;f__Carnobact<br>eriaceae;g__Atopostipes;    | 4.11E-05 | 2.05E-05 | 2.05E-05 | 9.61E-01 | 8.69E-01 | 1        | 2.38E-01 | 2.00 | 1        | 1.00 | 1        | 2.00 |
| Granulicatella    | p__Firmicutes;c__Bacilli;o__<br>Lactobacillales;f__Carnobact<br>eriaceae;g__Granulicatella; | 0.017274 | 0.011626 | 0.011105 | 3.61E-04 | 1.98E-04 | 3.03E-01 | 3.28E-02 | 1.56 | 1        | 1.05 | 6.23E-01 | 1.49 |
| Enterococcaceae   | p__Firmicutes;c__Bacilli;o__<br>Lactobacillales;f__Enterococc<br>aceae;                     | 4.11E-05 | 2.05E-05 | 6.16E-05 | 1.06E-01 | 8.31E-01 | 4.07E-01 | 5.62E-01 | 0.67 | 1        | 0.33 | 1        | 2.00 |
| Enterococcus      | p__Firmicutes;c__Bacilli;o__<br>Lactobacillales;f__Enterococc<br>aceae;g__Enterococcus;     | 4.11E-05 | 2.05E-05 | 6.16E-05 | 1.02E-01 | 8.02E-01 | 7.27E-01 | 5.31E-01 | 0.67 | 1        | 0.33 | 1        | 2.00 |
| Lactobacillaceae  | p__Firmicutes;c__Bacilli;o__<br>Lactobacillales;f__Lactobacill<br>aceae;                    | 0.000226 | 0.000123 | 0.000195 | 3.78E-02 | 6.64E-01 | 1        | 1        | 1.16 | 1        | 0.63 | 1.98E-01 | 1.83 |

|                  |                                                                                           |          |          |          |          |          |          |          |       |          |      |          |        |
|------------------|-------------------------------------------------------------------------------------------|----------|----------|----------|----------|----------|----------|----------|-------|----------|------|----------|--------|
| Lactobacillus    | p__Firmicutes;c__Bacilli;o__<br>Lactobacillales;f__Lactobacill<br>aceae;g__Lactobacillus; | 0.000205 | 0.000123 | 0.000195 | 3.62E-02 | 5.94E-01 | 1        | 8.89E-01 | 1.05  | 1        | 0.63 | 1.39E-01 | 1.67   |
| Leuconostocaceae | p__Firmicutes;c__Bacilli;o__<br>Lactobacillales;f__Leuconost<br>ocaceae;                  | 0.000329 | 3.08E-05 | 0.001684 | 1.36E-02 | 2.59E-01 | 9.16E-10 | 1        | 0.20  | 1        | 0.02 | 4.06E-01 | 10.67  |
| Leuconostoc      | p__Firmicutes;c__Bacilli;o__<br>Lactobacillales;f__Leuconost<br>ocaceae;g__Leuconostoc;   | 0.00951  | 2.05E-05 | 0.000185 | 5.22E-02 | 4.40E-01 | 0        | 1.70E-02 | 51.44 | 1        | 0.11 | 9.84E-01 | 463.90 |
| Weissella        | p__Firmicutes;c__Bacilli;o__<br>Lactobacillales;f__Leuconost<br>ocaceae;g__Weissella;     | 0.00037  | 4.11E-05 | 0.001037 | 8.66E-02 | 1.69E-01 | 4.71E-07 | 3.87E-01 | 0.36  | 6.01E-01 | 0.04 | 7.41E-01 | 9.00   |
| P5D1-392         | p__Firmicutes;c__Bacilli;o__<br>Lactobacillales;f__P5D1-392;                              | 0.001869 | 0.002465 | 0.002331 | 3.07E-01 | 4.18E-01 | 1        | 1        | 0.80  | 1        | 1.06 | 1        | 0.76   |
| Streptococcaceae | p__Firmicutes;c__Bacilli;o__<br>Lactobacillales;f__Streptococ<br>caceae;                  | 0.139876 | 0.084028 | 0.087407 | 5.62E-02 | 3.17E-02 | 1        | 2.39E-01 | 1.60  | 1        | 0.96 | 3.62E-01 | 1.66   |
| Lactococcus      | p__Firmicutes;c__Bacilli;o__<br>Lactobacillales;f__Streptococ<br>caceae;g__Lactococcus;   | 4.11E-05 | 4.11E-05 | 4.11E-05 | 3.61E-01 | 2.25E-01 | 1        | 2.75E-01 | 1.00  | 1        | 1.00 | 9.19E-01 | 1.00   |
| Streptococcus    | p__Firmicutes;c__Bacilli;o__<br>Lactobacillales;f__Streptococ<br>caceae;g__Streptococcus; | 0.139814 | 0.084028 | 0.087397 | 5.36E-02 | 2.75E-02 | 1        | 1.76E-01 | 1.60  | 1        | 0.96 | 4.72E-01 | 1.66   |
| Clostridia       | p__Firmicutes;c__Clostridia;                                                              | 0.089102 | 0.044325 | 0.048833 | 1.70E-07 | 6.10E-07 | 8.22E-05 | 4.63E-03 | 1.82  | 1        | 0.91 | 1.13E-01 | 2.01   |
| Clostridiales    | p__Firmicutes;c__Clostridia;<br>o__Clostridiales;                                         | 0.089102 | 0.044325 | 0.048833 | 2.40E-07 | 1.15E-06 | 8.85E-05 | 2.97E-03 | 1.82  | 1        | 0.91 | 1.44E-01 | 2.01   |

|                                            |                                                                                                                                  |          |          |          |          |          |          |          |      |          |      |          |      |
|--------------------------------------------|----------------------------------------------------------------------------------------------------------------------------------|----------|----------|----------|----------|----------|----------|----------|------|----------|------|----------|------|
| Christensenellaceae                        | p__Firmicutes;c__Clostridia;<br>o__Clostridiales;f__Christensenellaceae;                                                         | 4.11E-05 | 4.11E-05 | 4.11E-05 | 5.90E-02 | 1.10E-01 | 5.26E-02 | 8.06E-01 | 1.00 | 1        | 1.00 | 7.92E-01 | 1.00 |
| Christensenellaceae R-7 group              | p__Firmicutes;c__Clostridia;<br>o__Clostridiales;f__Christensenellaceae;g__Christensenellaceae_R-7_group;                        | 5.14E-05 | 4.11E-05 | 4.11E-05 | 3.09E-02 | 4.47E-02 | 5.57E-02 | 3.40E-01 | 1.25 | 1        | 1.00 | 9.14E-01 | 1.25 |
| Clostridiaceae 1                           | p__Firmicutes;c__Clostridia;<br>o__Clostridiales;f__Clostridiaceae_1;                                                            | 6.16E-05 | 2.05E-05 | 6.16E-05 | 5.27E-02 | 6.98E-01 | 1.19E-03 | 1        | 1.00 | 1        | 0.33 | 1        | 3.00 |
| Clostridium sensu stricto 1                | p__Firmicutes;c__Clostridia;<br>o__Clostridiales;f__Clostridiaceae_1;g__Clostridium_sensu_stricto_1;                             | 4.11E-05 | 2.05E-05 | 4.11E-05 | 1.59E-01 | 6.47E-01 | 1.48E-01 | 6.75E-01 | 1.00 | 1        | 0.50 | 1        | 2.00 |
| Clostridiales vadinBB60 group              | p__Firmicutes;c__Clostridia;<br>o__Clostridiales;f__Clostridiales_vadinBB60_group;                                               | 0.000185 | 4.11E-05 | 6.16E-05 | 6.69E-07 | 7.76E-05 | 5.04E-13 | 1.03E-02 | 3.00 | 1        | 0.67 | 1.83E-02 | 4.50 |
| unidentified Clostridiales vadinBB60 group | p__Firmicutes;c__Clostridia;<br>o__Clostridiales;f__Clostridiales_vadinBB60_group;g__unidentified_Clostridiales_vadinBB60_group; | 0.000185 | 4.11E-05 | 6.16E-05 | 3.28E-06 | 4.28E-04 | 1.03E-12 | 4.59E-02 | 3.00 | 1        | 0.67 | 7.05E-03 | 4.50 |
| Defluviitaleaceae                          | p__Firmicutes;c__Clostridia;<br>o__Clostridiales;f__Defluviitaleaceae;                                                           | 0.001356 | 0.000246 | 0.00076  | 8.58E-10 | 1.05E-02 | 4.83E-10 | 1.71E-02 | 1.78 | 4.33E-01 | 0.32 | 2.00E-03 | 5.50 |

|                           |                                                                                                     |          |          |          |          |          |          |          |      |          |      |          |      |
|---------------------------|-----------------------------------------------------------------------------------------------------|----------|----------|----------|----------|----------|----------|----------|------|----------|------|----------|------|
| Defluviitaleaceae UCG-011 | p__Firmicutes;c__Clostridia;<br>o__Clostridiales;f__Defluviitaleaceae;g__Defluviitaleaceae_UCG-011; | 0.001356 | 0.000246 | 0.00076  | 1.42E-09 | 9.82E-03 | 1.27E-10 | 1.88E-02 | 1.78 | 5.16E-01 | 0.32 | 5.48E-04 | 5.50 |
| Family XI-1               | p__Firmicutes;c__Clostridia;<br>o__Clostridiales;f__Family_XI;                                      | 0.002239 | 0.00076  | 0.001181 | 9.06E-07 | 5.45E-03 | 2.76E-02 | 1.60E-02 | 1.90 | 4.16E-01 | 0.64 | 6.08E-04 | 2.95 |
| Parvimonas                | p__Firmicutes;c__Clostridia;<br>o__Clostridiales;f__Family_XI;g__Parvimonas;                        | 0.002116 | 0.00076  | 0.00114  | 1.23E-06 | 6.16E-03 | 1.91E-02 | 3.26E-02 | 1.86 | 3.62E-01 | 0.67 | 1.30E-04 | 2.78 |
| unidentified Family XI    | p__Firmicutes;c__Clostridia;<br>o__Clostridiales;f__Family_XI;g__unidentified_Family_XI;            | 5.14E-05 | 2.05E-05 | 4.11E-05 | 2.75E-01 | 5.14E-01 | 1        | 1        | 1.25 | 8.37E-01 | 0.50 | 1        | 2.50 |
| Family XIII               | p__Firmicutes;c__Clostridia;<br>o__Clostridiales;f__Family_XIII;                                    | 0.007374 | 0.002999 | 0.003471 | 3.46E-08 | 1.05E-06 | 5.04E-04 | 6.17E-04 | 2.12 | 1        | 0.86 | 7.73E-03 | 2.46 |
| Eubacterium brachy group  | p__Firmicutes;c__Clostridia;<br>o__Clostridiales;f__Family_XIII;g__Eubacterium_brachy_group;        | 0.000144 | 6.16E-05 | 0.000103 | 2.40E-04 | 3.54E-02 | 1        | 2.42E-01 | 1.40 | 4.88E-01 | 0.60 | 5.26E-03 | 2.33 |
| Eubacterium nodatum group | p__Firmicutes;c__Clostridia;<br>o__Clostridiales;f__Family_XIII;g__Eubacterium_nodatum_group;       | 0.001828 | 0.001315 | 0.000976 | 5.74E-06 | 1.58E-06 | 6.48E-04 | 4.17E-02 | 1.87 | 1        | 1.35 | 9.91E-01 | 1.39 |

|                             |                                                                                                      |          |          |          |          |          |          |          |      |          |      |          |      |
|-----------------------------|------------------------------------------------------------------------------------------------------|----------|----------|----------|----------|----------|----------|----------|------|----------|------|----------|------|
| Family XIII<br>UCG-001      | p__Firmicutes;c__Clostridia;<br>o__Clostridiales;f__Family_<br>XIII;g__Family_XIII_UCG-<br>001;      | 0.000267 | 0.000123 | 0.000123 | 5.60E-08 | 1.19E-07 | 6.78E-05 | 1.07E-03 | 2.17 | 7.54E-01 | 1.00 | 7.08E-02 | 2.17 |
| Mogibacterium               | p__Firmicutes;c__Clostridia;<br>o__Clostridiales;f__Family_<br>XIII;g__Mogibacterium;                | 0.000493 | 0.000246 | 0.000205 | 1.31E-07 | 1.04E-07 | 7.35E-06 | 5.17E-02 | 2.40 | 1        | 1.20 | 4.01E-01 | 2.00 |
| unidentified<br>Family XIII | p__Firmicutes;c__Clostridia;<br>o__Clostridiales;f__Family_<br>XIII;g__unidentified_Family_<br>XIII; | 0.001972 | 0.000657 | 0.000822 | 2.20E-07 | 5.37E-06 | 1.44E-05 | 3.61E-02 | 2.40 | 8.51E-01 | 0.80 | 1.14E-01 | 3.00 |
| Lachnospiracea<br>e         | p__Firmicutes;c__Clostridia;<br>o__Clostridiales;f__Lachnosp<br>iraceae;                             | 0.053712 | 0.025962 | 0.025603 | 8.39E-07 | 7.62E-07 | 1.20E-04 | 9.33E-06 | 2.10 | 6.59E-01 | 1.01 | 2.82E-01 | 2.07 |
| Anaerostipes                | p__Firmicutes;c__Clostridia;<br>o__Clostridiales;f__Lachnosp<br>iraceae;g__Anaerostipes;             | 4.11E-05 | 2.05E-05 | 4.11E-05 | 2.99E-01 | 5.94E-01 | 1        | 8.47E-01 | 1.00 | 1        | 0.50 | 1        | 2.00 |
| Blautia                     | p__Firmicutes;c__Clostridia;<br>o__Clostridiales;f__Lachnosp<br>iraceae;g__Blautia;                  | 8.22E-05 | 3.08E-05 | 4.11E-05 | 1.11E-04 | 1.16E-02 | 3.37E-03 | 2.01E-02 | 2.00 | 1        | 0.75 | 7.00E-02 | 2.67 |
| Butyrivibrio 2              | p__Firmicutes;c__Clostridia;<br>o__Clostridiales;f__Lachnosp<br>iraceae;g__Butyrivibrio_2;           | 0.0023   | 0.002198 | 0.001684 | 1.22E-01 | 1.04E-01 | 1        | 3.95E-01 | 1.37 | 9.47E-01 | 1.30 | 1        | 1.05 |
| Catonella                   | p__Firmicutes;c__Clostridia;<br>o__Clostridiales;f__Lachnosp<br>iraceae;g__Catonella;                | 0.002855 | 0.001602 | 0.00114  | 1.99E-07 | 5.81E-08 | 2.11E-08 | 3.62E-03 | 2.50 | 1.67E-01 | 1.41 | 6.19E-01 | 1.78 |

|                                     |                                                                                                               |          |          |          |          |          |          |          |      |          |      |          |      |
|-------------------------------------|---------------------------------------------------------------------------------------------------------------|----------|----------|----------|----------|----------|----------|----------|------|----------|------|----------|------|
| Coprococcus 2                       | p__Firmicutes;c__Clostridia;<br>o__Clostridiales;f__Lachnosp<br>iraceae;g__Coprococcus_2;                     | 0.000113 | 2.05E-05 | 6.16E-05 | 4.50E-01 | 6.99E-01 | 0        | 1        | 1.83 | NA       | 0.33 | NA       | 5.51 |
| Eubacterium<br>ruminantium<br>group | p__Firmicutes;c__Clostridia;<br>o__Clostridiales;f__Lachnosp<br>iraceae;g__Eubacterium_rumi<br>nantium_group; | 0.000185 | 2.05E-05 | 4.11E-05 | 2.62E-04 | 1.30E-02 | 1        | 7.06E-02 | 4.50 | 7.68E-01 | 0.50 | 7.41E-01 | 9.02 |
| Eubacterium<br>ventriosum<br>group  | p__Firmicutes;c__Clostridia;<br>o__Clostridiales;f__Lachnosp<br>iraceae;g__Eubacterium_vent<br>riosum_group;  | 5.14E-05 | 2.05E-05 | 3.08E-05 | 1.83E-01 | 2.75E-01 | 0        | 6.85E-01 | 1.67 | NA       | 0.67 | NA       | 2.50 |
| Johnsonella                         | p__Firmicutes;c__Clostridia;<br>o__Clostridiales;f__Lachnosp<br>iraceae;g__Johnsonella;                       | 0.000616 | 0.000349 | 0.000359 | 8.70E-03 | 6.19E-03 | 1        | 4.43E-02 | 1.71 | 1        | 0.97 | 1.14E-01 | 1.76 |
| Lachnoanaeroba<br>culum             | p__Firmicutes;c__Clostridia;<br>o__Clostridiales;f__Lachnosp<br>iraceae;g__Lachnoanaerobacu<br>lum;           | 0.002629 | 0.001746 | 0.001602 | 2.62E-03 | 1.03E-03 | 1        | 6.74E-02 | 1.64 | 1        | 1.09 | 3.59E-02 | 1.51 |
| Lachnoclostridi<br>um               | p__Firmicutes;c__Clostridia;<br>o__Clostridiales;f__Lachnosp<br>iraceae;g__Lachnoclostridium<br>;             | 4.11E-05 | 4.11E-05 | 2.05E-05 | 2.86E-01 | 2.75E-01 | 2.65E-01 | 7.08E-01 | 2.00 | 1        | 2.00 | 1        | 1.00 |
| Lachnospira                         | p__Firmicutes;c__Clostridia;<br>o__Clostridiales;f__Lachnosp<br>iraceae;g__Lachnospira;                       | 8.22E-05 | 2.05E-05 | 0.000103 | 6.64E-03 | 6.61E-01 | 1        | 7.51E-01 | 0.80 | 1        | 0.20 | 1        | 4.01 |



|                               |                                                                                                       |          |          |          |          |          |          |          |      |          |      |          |      |
|-------------------------------|-------------------------------------------------------------------------------------------------------|----------|----------|----------|----------|----------|----------|----------|------|----------|------|----------|------|
| Lachnospiraceae NK3A20 group  | p__Firmicutes;c__Clostridia;<br>o__Clostridiales;f__Lachnospiraceae;g__Lachnospiraceae_NK3A20_group;  | 0.000123 | 2.05E-05 | 3.08E-05 | 6.02E-02 | 5.06E-02 | 0        | 1        | 4.00 | NA       | 0.67 | NA       | 6.01 |
| Lachnospiraceae NK4A136 group | p__Firmicutes;c__Clostridia;<br>o__Clostridiales;f__Lachnospiraceae;g__Lachnospiraceae_NK4A136_group; | 6.16E-05 | 4.11E-05 | 9.24E-05 | 3.46E-05 | 4.66E-02 | 1.92E-02 | 2.01E-02 | 0.67 | 3.62E-01 | 0.44 | 4.52E-01 | 1.50 |
| Moryella                      | p__Firmicutes;c__Clostridia;<br>o__Clostridiales;f__Lachnospiraceae;g__Moryella;                      | 2.05E-05 | 3.08E-05 | 2.05E-05 | 7.88E-01 | 6.61E-01 | 1        | 1        | 1.00 | 1        | 1.50 | 1        | 0.67 |
| Oribacterium                  | p__Firmicutes;c__Clostridia;<br>o__Clostridiales;f__Lachnospiraceae;g__Oribacterium;                  | 0.035945 | 0.014891 | 0.015076 | 1.95E-07 | 8.17E-07 | 4.06E-06 | 2.49E-03 | 2.38 | 1        | 0.99 | 1.07E-01 | 2.41 |
| Pseudobutyrvibrio             | p__Firmicutes;c__Clostridia;<br>o__Clostridiales;f__Lachnospiraceae;g__Pseudobutyrvibrio;             | 6.16E-05 | 4.11E-05 | 6.16E-05 | 2.89E-02 | 6.24E-01 | 1        | 1        | 1.00 | 1        | 0.67 | 9.14E-01 | 1.50 |
| Roseburia                     | p__Firmicutes;c__Clostridia;<br>o__Clostridiales;f__Lachnospiraceae;g__Roseburia;                     | 7.19E-05 | 6.16E-05 | 0.000113 | 2.12E-03 | 4.04E-02 | 5.44E-01 | 6.93E-01 | 0.64 | 1        | 0.55 | 1        | 1.17 |
| Shuttleworthia                | p__Firmicutes;c__Clostridia;<br>o__Clostridiales;f__Lachnospiraceae;g__Shuttleworthia;                | 0.000123 | 8.22E-05 | 6.16E-05 | 1.95E-03 | 9.86E-04 | 1.22E-02 | 9.30E-02 | 2.00 | 4.48E-01 | 1.33 | 1.94E-01 | 1.50 |

|                              |                                                                                                      |          |          |          |          |          |          |          |      |          |      |          |      |
|------------------------------|------------------------------------------------------------------------------------------------------|----------|----------|----------|----------|----------|----------|----------|------|----------|------|----------|------|
| Stomatobaculum               | p__Firmicutes;c__Clostridia;<br>o__Clostridiales;f__Lachnospiraceae;g__Stomatobaculum;               | 0.000965 | 0.000575 | 0.000288 | 1.73E-09 | 1.31E-10 | 1.29E-08 | 1.91E-05 | 3.36 | 8.60E-02 | 2.00 | 1.91E-01 | 1.68 |
| unidentified Lachnospiraceae | p__Firmicutes;c__Clostridia;<br>o__Clostridiales;f__Lachnospiraceae;g__unidentified_Lachnospiraceae; | 6.16E-05 | 4.11E-05 | 5.14E-05 | 1.04E-01 | 5.79E-01 | 1        | 1        | 1.20 | 1        | 0.80 | 8.40E-01 | 1.50 |
| Peptococcaceae               | p__Firmicutes;c__Clostridia;<br>o__Clostridiales;f__Peptococcaceae;                                  | 0.000288 | 0.000144 | 0.000246 | 8.20E-05 | 2.59E-01 | 1        | 1        | 1.17 | 7.76E-01 | 0.58 | 1.30E-01 | 2.00 |
| Peptococcus                  | p__Firmicutes;c__Clostridia;<br>o__Clostridiales;f__Peptococcaceae;g__Peptococcus;                   | 0.000267 | 0.000144 | 0.000236 | 1.75E-04 | 2.75E-01 | 1        | 9.65E-01 | 1.13 | 7.27E-01 | 0.61 | 1.14E-01 | 1.86 |
| Peptostreptococaceae         | p__Firmicutes;c__Clostridia;<br>o__Clostridiales;f__Peptostreptococcaceae;                           | 0.012283 | 0.004252 | 0.005648 | 1.60E-06 | 1.22E-04 | 3.81E-02 | 1.02E-01 | 2.17 | 7.33E-01 | 0.75 | 7.70E-02 | 2.89 |
| Filifactor                   | p__Firmicutes;c__Clostridia;<br>o__Clostridiales;f__Peptostreptococcaceae;g__Filifactor;             | 0.001602 | 0.000246 | 0.000709 | 1.84E-10 | 9.02E-02 | 1.50E-11 | 7.06E-02 | 2.26 | 4.24E-02 | 0.35 | 5.28E-03 | 6.50 |
| Peptoclostridium             | p__Firmicutes;c__Clostridia;<br>o__Clostridiales;f__Peptostreptococcaceae;g__Peptoclostridium;       | 0.004272 | 0.001253 | 0.001561 | 6.16E-08 | 2.31E-05 | 2.60E-06 | 3.07E-03 | 2.74 | 1        | 0.80 | 1.98E-02 | 3.41 |
| Peptostreptococcus           | p__Firmicutes;c__Clostridia;<br>o__Clostridiales;f__Peptostre                                        | 0.004416 | 0.002547 | 0.002455 | 5.99E-03 | 2.75E-03 | 1        | 6.43E-02 | 1.80 | 1        | 1.04 | 9.89E-01 | 1.73 |

|                                     |                                                                                                         |          |          |          |          |          |          |          |      |          |      |          |      |
|-------------------------------------|---------------------------------------------------------------------------------------------------------|----------|----------|----------|----------|----------|----------|----------|------|----------|------|----------|------|
|                                     | ptococcaceae;g__Peptostreptococcus;                                                                     |          |          |          |          |          |          |          |      |          |      |          |      |
| Romboutsia                          | p__Firmicutes;c__Clostridia;o__Clostridiales;f__Peptostreptococcaceae;g__Romboutsia;                    | 4.11E-05 | 2.05E-05 | 4.11E-05 | 6.53E-01 | 9.87E-01 | 0        | 1        | 1.00 | 7.54E-01 | 0.50 | 1        | 2.00 |
| Ruminococcaceae                     | p__Firmicutes;c__Clostridia;o__Clostridiales;f__Ruminococcaceae;                                        | 0.007867 | 0.004293 | 0.005587 | 1.40E-02 | 1.46E-02 | 1        | 5.05E-01 | 1.41 | 7.76E-01 | 0.77 | 9.67E-02 | 1.83 |
| Eubacterium coprostanoligenes group | p__Firmicutes;c__Clostridia;o__Clostridiales;f__Ruminococcaceae;g__Eubacterium_coprostanoligenes_group; | 5.14E-05 | 4.11E-05 | 4.11E-05 | 3.42E-02 | 1.14E-01 | 1        | 8.18E-01 | 1.25 | 1        | 1.00 | 9.14E-01 | 1.25 |
| Faecalibacterium                    | p__Firmicutes;c__Clostridia;o__Clostridiales;f__Ruminococcaceae;g__Faecalibacterium;                    | 7.19E-05 | 0.000103 | 6.16E-05 | 2.54E-01 | 5.55E-01 | 1.06E-06 | 5.96E-01 | 1.17 | 1        | 1.67 | 1        | 0.70 |
| Ruminiclostridium 5                 | p__Firmicutes;c__Clostridia;o__Clostridiales;f__Ruminococcaceae;g__Ruminiclostridium_5;                 | 0.000103 | 4.11E-05 | 2.05E-05 | 2.00E-01 | 1.23E-01 | 1        | 9.65E-01 | 5.01 | 9.29E-01 | 2.00 | 8.62E-01 | 2.50 |
| Ruminiclostridium 6                 | p__Firmicutes;c__Clostridia;o__Clostridiales;f__Ruminococcaceae;g__Ruminiclostridium_6;                 | 9.24E-05 | 2.05E-05 | 8.22E-05 | 6.74E-02 | 7.37E-01 | 1        | 1        | 1.12 | 6.42E-01 | 0.25 | 9.89E-01 | 4.51 |

|                               |                                                                                                       |          |          |          |          |          |          |          |      |          |      |          |      |
|-------------------------------|-------------------------------------------------------------------------------------------------------|----------|----------|----------|----------|----------|----------|----------|------|----------|------|----------|------|
| Ruminiclostridium 9           | p__Firmicutes;c__Clostridia;<br>o__Clostridiales;f__Ruminococcaceae;g__Ruminiclostridium_9;           | 4.11E-05 | 4.11E-05 | 4.11E-05 | 8.29E-01 | 7.05E-01 | 0        | 1        | 1.00 | 1        | 1.00 | 1        | 1.00 |
| Ruminococcaceae NK4A214 group | p__Firmicutes;c__Clostridia;<br>o__Clostridiales;f__Ruminococcaceae;g__Ruminococcaceae_NK4A214_group; | 8.22E-05 | 2.05E-05 | 4.11E-05 | 2.52E-02 | 4.43E-02 | 7.75E-01 | 1        | 2.00 | 1        | 0.50 | 9.58E-01 | 4.01 |
| Ruminococcaceae UCG-002       | p__Firmicutes;c__Clostridia;<br>o__Clostridiales;f__Ruminococcaceae;g__Ruminococcaceae_UCG-002;       | 6.16E-05 | 4.11E-05 | 4.11E-05 | 1.28E-01 | 2.98E-01 | 1        | 1        | 1.50 | 1        | 1.00 | 8.93E-01 | 1.50 |
| Ruminococcaceae UCG-005       | p__Firmicutes;c__Clostridia;<br>o__Clostridiales;f__Ruminococcaceae;g__Ruminococcaceae_UCG-005;       | 0.000123 | 2.05E-05 | 0.000103 | 2.36E-01 | 5.23E-01 | 0        | 1        | 1.20 | NA       | 0.20 | NA       | 6.01 |
| Ruminococcaceae UCG-010       | p__Firmicutes;c__Clostridia;<br>o__Clostridiales;f__Ruminococcaceae;g__Ruminococcaceae_UCG-010;       | 0.000123 | 2.05E-05 | 2.05E-05 | 2.71E-02 | 1.71E-02 | 0        | 9.57E-01 | 6.01 | NA       | 1.00 | NA       | 6.01 |
| Ruminococcaceae UCG-014       | p__Firmicutes;c__Clostridia;<br>o__Clostridiales;f__Ruminococcaceae;g__Ruminococcaceae_UCG-014;       | 0.007251 | 0.00417  | 0.005443 | 5.31E-02 | 3.48E-02 | 1        | 5.64E-01 | 1.33 | 7.54E-01 | 0.77 | 1.56E-01 | 1.74 |
| Ruminococcus 1                | p__Firmicutes;c__Clostridia;<br>o__Clostridiales;f__Ruminoc                                           | 8.21E-05 | 2.05E-05 | 4.11E-05 | 9.05E-02 | 2.75E-01 | 0        | 9.65E-01 | 2.00 | NA       | 0.50 | NA       | 4.01 |

|                     |                                                                                              |          |          |          |          |          |          |          |      |          |      |          |      |
|---------------------|----------------------------------------------------------------------------------------------|----------|----------|----------|----------|----------|----------|----------|------|----------|------|----------|------|
|                     | occaceae;g__Ruminococcus_1;                                                                  |          |          |          |          |          |          |          |      |          |      |          |      |
| Ruminococcus 2      | p__Firmicutes;c__Clostridia;o__Clostridiales;f__Ruminococcaceae;g__Ruminococcus_2;           | 6.16E-05 | 3.08E-05 | 4.11E-05 | 6.28E-03 | 1.72E-02 | 1        | 6.93E-01 | 1.50 | 1        | 0.75 | 1        | 2.00 |
| Subdoligranulum     | p__Firmicutes;c__Clostridia;o__Clostridiales;f__Ruminococcaceae;g__Subdoligranulum;          | 4.11E-05 | 2.05E-05 | 4.11E-05 | 1.66E-01 | 7.64E-01 | 1        | 1        | 1.00 | 1        | 0.50 | 9.14E-01 | 2.00 |
| Erysipelotrichia    | p__Firmicutes;c__Erysipelotrichia;                                                           | 0.003286 | 0.00189  | 0.001797 | 5.24E-05 | 4.42E-05 | 1.19E-01 | 2.68E-02 | 1.83 | 1        | 1.05 | 1.17E-01 | 1.74 |
| Erysipelotrichales  | p__Firmicutes;c__Erysipelotrichia;o__Erysipelotrichales;                                     | 0.003286 | 0.00189  | 0.001797 | 5.81E-05 | 7.50E-05 | 1.12E-01 | 2.45E-02 | 1.83 | 1        | 1.05 | 1.24E-01 | 1.74 |
| Erysipelotrichaceae | p__Firmicutes;c__Erysipelotrichia;o__Erysipelotrichales;f__Erysipelotrichaceae;              | 0.003286 | 0.00189  | 0.001797 | 5.79E-05 | 7.76E-05 | 2.46E-01 | 2.05E-02 | 1.83 | 1        | 1.05 | 6.62E-02 | 1.74 |
| Bulleidia           | p__Firmicutes;c__Erysipelotrichia;o__Erysipelotrichales;f__Erysipelotrichaceae;g__Bulleidia; | 6.16E-05 | 4.11E-05 | 4.11E-05 | 1.66E-02 | 2.69E-02 | 1        | 3.04E-01 | 1.50 | 6.70E-01 | 1.00 | 9.59E-01 | 1.50 |
| Eggerthia           | p__Firmicutes;c__Erysipelotrichia;o__Erysipelotrichales;f__Erysipelotrichaceae;g__Eggerthia; | 4.11E-05 | 4.11E-05 | 4.11E-05 | 8.48E-01 | 7.19E-01 | 1        | 1        | 1.00 | 1        | 1.00 | 1        | 1.00 |

|                             |                                                                                                                |          |          |          |          |          |          |          |      |          |      |          |      |
|-----------------------------|----------------------------------------------------------------------------------------------------------------|----------|----------|----------|----------|----------|----------|----------|------|----------|------|----------|------|
| Erysipelotrichaceae UCG-006 | p__Firmicutes;c__Erysipelotrichia;o__Erysipelotrichales;f__Erysipelotrichaceae;g__Erysipelotrichaceae_UCG-006; | 0.001089 | 0.000039 | 0.000493 | 4.04E-05 | 1.03E-03 | 1.20E-01 | 1.53E-02 | 2.21 | 6.67E-01 | 0.79 | 7.66E-04 | 2.79 |
| Solobacterium               | p__Firmicutes;c__Erysipelotrichia;o__Erysipelotrichales;f__Erysipelotrichaceae;g__Solobacterium;               | 0.001787 | 0.001356 | 0.001006 | 3.94E-04 | 1.40E-04 | 1.20E-01 | 4.76E-02 | 1.78 | 4.78E-01 | 1.35 | 7.74E-01 | 1.32 |
| Negativicutes               | p__Firmicutes;c__Negativicutes;                                                                                | 0.033624 | 0.063571 | 0.022214 | 1.40E-06 | 3.37E-02 | 1.67E-09 | 2.33E-01 | 1.51 | 8.60E-02 | 2.86 | 5.08E-01 | 0.53 |
| Selenomonadales             | p__Firmicutes;c__Negativicutes;o__Selenomonadales;                                                             | 0.033624 | 0.063571 | 0.022214 | 2.31E-06 | 4.70E-02 | 6.16E-09 | 2.41E-01 | 1.51 | 8.10E-02 | 2.86 | 4.02E-01 | 0.53 |
| Acidaminococaceae           | p__Firmicutes;c__Negativicutes;o__Selenomonadales;f__Acidaminococaceae;                                        | 4.11E-05 | 2.05E-05 | 4.11E-05 | 2.41E-02 | 2.22E-01 | 1        | 1        | 1.00 | 1        | 0.50 | 7.92E-01 | 2.00 |
| Veillonellaceae             | p__Firmicutes;c__Negativicutes;o__Selenomonadales;f__Veillonellaceae;                                          | 0.033541 | 0.06355  | 0.022214 | 1.60E-06 | 4.18E-02 | 8.89E-08 | 1.63E-01 | 1.51 | 1.10E-01 | 2.86 | 4.17E-01 | 0.53 |
| Anaeroglobus                | p__Firmicutes;c__Negativicutes;o__Selenomonadales;f__Veillonellaceae;g__Anaeroglobus;                          | 6.16E-05 | 4.11E-05 | 4.11E-05 | 4.43E-02 | 6.75E-02 | 1.04E-01 | 3.18E-01 | 1.50 | 1        | 1.00 | 7.41E-01 | 1.50 |
| Dialister                   | p__Firmicutes;c__Negativicutes;o__Selenomonadales;f__Veillonellaceae;g__Dialister;                             | 0.000883 | 0.00076  | 0.000668 | 1.52E-01 | 6.75E-02 | 1        | 4.83E-01 | 1.32 | 9.47E-01 | 1.14 | 1        | 1.16 |

|                                 |                                                                                                                   |          |          |          |          |          |          |          |      |          |      |          |      |
|---------------------------------|-------------------------------------------------------------------------------------------------------------------|----------|----------|----------|----------|----------|----------|----------|------|----------|------|----------|------|
| Megasphaera                     | p__Firmicutes;c__Negativicut<br>es;o__Selenomonadales;f__V<br>eillonellaceae;g__Megasphaer<br>a;                  | 0.000236 | 0.000246 | 0.000103 | 3.02E-04 | 4.08E-03 | 1.89E-06 | 4.00E-02 | 2.30 | 3.85E-02 | 2.40 | 1        | 0.96 |
| Selenomonas                     | p__Firmicutes;c__Negativicut<br>es;o__Selenomonadales;f__V<br>eillonellaceae;g__Selenomon<br>as;                  | 0.003512 | 0.005936 | 0.002013 | 3.46E-05 | 4.04E-02 | 1.03E-05 | 7.44E-02 | 1.74 | 3.70E-03 | 2.95 | 1.12E-02 | 0.59 |
| Selenomonas 3                   | p__Firmicutes;c__Negativicut<br>es;o__Selenomonadales;f__V<br>eillonellaceae;g__Selenomon<br>as_3;                | 0.01103  | 0.019903 | 0.006953 | 1.07E-05 | 1.67E-01 | 3.68E-06 | 2.84E-01 | 1.59 | 2.35E-02 | 2.86 | 4.01E-01 | 0.55 |
| Selenomonas 4                   | p__Firmicutes;c__Negativicut<br>es;o__Selenomonadales;f__V<br>eillonellaceae;g__Selenomon<br>as_4;                | 0.002506 | 0.003656 | 0.000945 | 3.97E-09 | 3.63E-06 | 1.65E-11 | 4.05E-03 | 2.65 | 1.02E-02 | 3.87 | 3.18E-01 | 0.69 |
| unidentified<br>Veillonellaceae | p__Firmicutes;c__Negativicut<br>es;o__Selenomonadales;f__V<br>eillonellaceae;g__unidentified<br>_Veillonellaceae; | 7.19E-05 | 8.22E-05 | 6.16E-05 | 4.02E-01 | 4.30E-01 | 8.50E-04 | 1        | 1.17 | 5.16E-01 | 1.33 | 9.84E-01 | 0.87 |
| Veillonella                     | p__Firmicutes;c__Negativicut<br>es;o__Selenomonadales;f__V<br>eillonellaceae;g__Veillonella;                      | 0.013947 | 0.023703 | 0.007939 | 4.37E-07 | 1.03E-02 | 1.04E-08 | 4.57E-02 | 1.76 | 2.27E-02 | 2.99 | 1.84E-01 | 0.59 |
| unidentified<br>Firmicutes      | p__Firmicutes;c__unidentifie<br>d_Firmicutes;                                                                     | 0.000349 | 0.000123 | 0.000103 | 6.71E-07 | 2.24E-07 | 3.50E-05 | 3.38E-04 | 3.40 | 9.92E-01 | 1.20 | 8.24E-02 | 2.83 |

|                   |                                                                                                       |          |          |          |          |          |          |          |      |          |      |          |      |
|-------------------|-------------------------------------------------------------------------------------------------------|----------|----------|----------|----------|----------|----------|----------|------|----------|------|----------|------|
| Clostridiales-1   | p__Firmicutes;c__unidentifie<br>d_Firmicutes;o__Clostridiales<br>;                                    | 0.000349 | 0.000123 | 0.000103 | 1.04E-06 | 3.46E-07 | 3.52E-05 | 1.61E-03 | 3.40 | 7.14E-01 | 1.20 | 9.38E-02 | 2.83 |
| Family XIII-1     | p__Firmicutes;c__unidentifie<br>d_Firmicutes;o__Clostridiales<br>;f__Family_XIII;                     | 0.000349 | 0.000103 | 8.22E-05 | 2.16E-07 | 1.69E-07 | 5.03E-05 | 3.21E-03 | 4.25 | 1        | 1.25 | 9.92E-02 | 3.40 |
| Lachnospiraceae-1 | p__Firmicutes;c__unidentifie<br>d_Firmicutes;o__Clostridiales<br>;f__Lachnospiraceae;                 | 4.11E-05 | 4.11E-05 | 4.11E-05 | 7.81E-01 | 6.98E-01 | 1        | 1        | 1.00 | 1        | 1.00 | 1        | 1.00 |
| Fusobacteria      | p__Fusobacteria;                                                                                      | 0.013823 | 0.007333 | 0.005597 | 6.80E-05 | 9.09E-06 | 1.30E-01 | 1.04E-03 | 2.47 | 7.01E-02 | 1.31 | 9.31E-02 | 1.89 |
| Fusobacteriia     | p__Fusobacteria;c__Fusobact<br>eriia;                                                                 | 0.013823 | 0.007333 | 0.005597 | 7.87E-05 | 1.20E-05 | 6.13E-02 | 5.33E-04 | 2.47 | 1.47E-01 | 1.31 | 1.13E-01 | 1.89 |
| Fusobacteriales   | p__Fusobacteria;c__Fusobact<br>eriia;o__Fusobacteriales;                                              | 0.013823 | 0.007333 | 0.005597 | 9.07E-05 | 2.02E-05 | 6.93E-02 | 2.67E-03 | 2.47 | 1.17E-01 | 1.31 | 1.24E-01 | 1.89 |
| Fusobacteriaceae  | p__Fusobacteria;c__Fusobact<br>eriia;o__Fusobacteriales;f__F<br>usobacteriaceae;                      | 0.009797 | 0.005053 | 0.004406 | 7.74E-05 | 3.37E-05 | 3.40E-01 | 1.27E-02 | 2.22 | 2.57E-01 | 1.15 | 1.55E-01 | 1.94 |
| Cetobacterium     | p__Fusobacteria;c__Fusobact<br>eriia;o__Fusobacteriales;f__F<br>usobacteriaceae;g__Cetobacte<br>rium; | 2.05E-05 | 6.16E-05 | 6.16E-05 | 2.39E-02 | 1.41E-02 | 0        | 7.54E-02 | 0.33 | NA       | 1.00 | NA       | 0.33 |
| Fusobacterium     | p__Fusobacteria;c__Fusobact<br>eriia;o__Fusobacteriales;f__F<br>usobacteriaceae;g__Fusobacte<br>rium; | 0.009797 | 0.005053 | 0.004406 | 7.14E-05 | 3.05E-05 | 1.48E-01 | 8.04E-03 | 2.22 | 1.55E-01 | 1.15 | 1.39E-01 | 1.94 |



|                                      |                                                                                                                      |          |          |          |          |          |          |          |      |          |      |          |      |
|--------------------------------------|----------------------------------------------------------------------------------------------------------------------|----------|----------|----------|----------|----------|----------|----------|------|----------|------|----------|------|
| Leptotrichiaceae                     | p__Fusobacteria;c__Fusobact<br>eria;o__Fusobacteriales;f__L<br>eptotrichiaceae;                                      | 0.002547 | 0.002136 | 0.001089 | 2.33E-03 | 7.68E-04 | 5.63E-01 | 3.01E-03 | 2.34 | 8.29E-02 | 1.96 | 4.06E-01 | 1.19 |
| Leptotrichia                         | p__Fusobacteria;c__Fusobact<br>eria;o__Fusobacteriales;f__L<br>eptotrichiaceae;g__Leptotrich<br>ia;                  | 0.002547 | 0.002136 | 0.001048 | 1.59E-03 | 5.10E-04 | 2.54E-01 | 6.72E-03 | 2.43 | 4.95E-02 | 2.04 | 7.41E-01 | 1.19 |
| Streptobacillus                      | p__Fusobacteria;c__Fusobact<br>eria;o__Fusobacteriales;f__L<br>eptotrichiaceae;g__Streptobac<br>illus;               | 4.11E-05 | 4.11E-05 | 6.16E-05 | 2.51E-01 | 1.66E-01 | 3.50E-05 | 1        | 0.67 | 9.24E-01 | 0.67 | 9.66E-01 | 1.00 |
| unidentified<br>Leptotrichiaceae     | p__Fusobacteria;c__Fusobact<br>eria;o__Fusobacteriales;f__L<br>eptotrichiaceae;g__unidentifie<br>d_Leptotrichiaceae; | 6.16E-05 | 4.11E-05 | 4.11E-05 | 3.54E-01 | 2.25E-01 | 0        | 6.36E-01 | 1.50 | 1        | 1.00 | 1        | 1.50 |
| Gemmatimonad<br>etes                 | p__Gemmatimonadetes;                                                                                                 | 6.16E-05 | 4.11E-05 | 8.22E-05 | 3.27E-02 | 9.80E-01 | 8.18E-01 | 8.81E-01 | 0.75 | 1        | 0.50 | 8.47E-01 | 1.50 |
| unidentified<br>Gemmatimonad<br>etes | p__Gemmatimonadetes;c__u<br>nidentified_Gemmatimonadet<br>es;                                                        | 6.16E-05 | 4.11E-05 | 8.22E-05 | 3.63E-02 | 9.80E-01 | 1        | 9.22E-01 | 0.75 | 1        | 0.50 | 9.84E-01 | 1.50 |
| Gemmatimonad<br>ales                 | p__Gemmatimonadetes;c__u<br>nidentified_Gemmatimonadet<br>es;o__Gemmatimonadales;                                    | 7.19E-05 | 4.11E-05 | 8.22E-05 | 3.73E-02 | 8.32E-01 | 1        | 7.12E-01 | 0.87 | 1        | 0.50 | 1        | 1.75 |
| Gemmatimonad<br>aceae                | p__Gemmatimonadetes;c__u<br>nidentified_Gemmatimonadet                                                               | 7.19E-05 | 4.11E-05 | 8.22E-05 | 3.94E-02 | 8.04E-01 | 1        | 7.46E-01 | 0.87 | 1        | 0.50 | 1        | 1.75 |

|                               |                                                                                                                     |          |          |          |          |          |          |          |      |          |      |   |      |
|-------------------------------|---------------------------------------------------------------------------------------------------------------------|----------|----------|----------|----------|----------|----------|----------|------|----------|------|---|------|
|                               | es;o__Gemmatimonadales;f__Gemmatimonadaceae;                                                                        |          |          |          |          |          |          |          |      |          |      |   |      |
| Gemmatimonas                  | p__Gemmatimonadetes;c__unidentified_Gemmatimonadetes;o__Gemmatimonadales;f__Gemmatimonadaceae;g__Gemmatimonas;      | 6.16E-05 | 2.05E-05 | 6.16E-05 | 3.38E-01 | 7.31E-01 | 1        | 9.16E-01 | 1.00 | 8.96E-01 | 0.33 | 1 | 3.00 |
| unidentified Gemmatimonadetes | p__Gemmatimonadetes;c__unidentified_Gemmatimonadetes;o__unidentified_Gemmatimonadetes;                              | 4.11E-05 | 5.14E-05 | 0.000123 | 4.33E-01 | 4.00E-01 | 1        | 4.50E-01 | 0.33 | 6.70E-01 | 0.42 | 1 | 0.80 |
| S0134 terrestrial group       | p__Gemmatimonadetes;c__unidentified_Gemmatimonadetes;o__unidentified_Gemmatimonadetes;f__S0134_terrestrial_group;   | 4.11E-05 | 6.16E-05 | 0.000175 | 4.95E-01 | 5.11E-01 | 0        | 7.23E-01 | 0.24 | 7.76E-01 | 0.35 | 1 | 0.67 |
| Gracilibacteria               | p__Gracilibacteria;                                                                                                 | 0.000103 | 0.000113 | 0.000185 | 1.68E-01 | 8.84E-02 | 4.07E-02 | 1.29E-01 | 0.56 | 7.15E-01 | 0.61 | 1 | 0.91 |
| unidentified Gracilibacteria  | p__Gracilibacteria;c__unidentified_Gracilibacteria;                                                                 | 0.000103 | 0.000113 | 0.000185 | 2.05E-01 | 9.82E-02 | 1.75E-01 | 2.17E-01 | 0.56 | 9.92E-01 | 0.61 | 1 | 0.91 |
| unidentified Gracilibacteria  | p__Gracilibacteria;c__unidentified_Gracilibacteria;o__unidentified_Gracilibacteria;                                 | 0.000103 | 0.000113 | 0.000185 | 1.93E-01 | 1.22E-01 | 4.97E-01 | 2.24E-01 | 0.56 | 7.43E-01 | 0.61 | 1 | 0.91 |
| unidentified Gracilibacteria  | p__Gracilibacteria;c__unidentified_Gracilibacteria;o__unidentified_Gracilibacteria;f__unidentified_Gracilibacteria; | 0.000103 | 0.000113 | 0.000185 | 1.86E-01 | 1.12E-01 | 7.90E-01 | 2.17E-01 | 0.56 | 8.14E-01 | 0.61 | 1 | 0.91 |

|                                 |                                                                                                                                                     |          |          |          |          |          |          |          |      |          |      |          |      |
|---------------------------------|-----------------------------------------------------------------------------------------------------------------------------------------------------|----------|----------|----------|----------|----------|----------|----------|------|----------|------|----------|------|
| unidentified<br>Gracilibacteria | p__Gracilibacteria;c__unidentified_Gracilibacteria;o__unidentified_Gracilibacteria;f__unidentified_Gracilibacteria;g__unidentified_Gracilibacteria; | 0.000103 | 0.000113 | 0.000185 | 1.70E-01 | 9.25E-02 | 1        | 2.46E-01 | 0.56 | 8.96E-01 | 0.61 | 1        | 0.91 |
| Latescibacteria                 | p__Latescibacteria;                                                                                                                                 | 4.11E-05 | 0        | 8.22E-05 | 6.30E-01 | 6.73E-01 | 0        | 8.83E-01 | 0.50 | NA       | NA   | NA       | NA   |
| Nitrospirae                     | p__Nitrospirae;                                                                                                                                     | 6.16E-05 | 3.08E-05 | 8.22E-05 | 9.58E-02 | 9.42E-01 | 1.17E-01 | 8.83E-01 | 0.75 | 1        | 0.37 | 1        | 2.00 |
| Nitrospira                      | p__Nitrospirae;c__Nitrospira;                                                                                                                       | 6.16E-05 | 3.08E-05 | 8.22E-05 | 1.11E-01 | 9.78E-01 | 8.35E-01 | 9.95E-01 | 0.75 | 1        | 0.37 | 1        | 2.00 |
| Nitrospirales                   | p__Nitrospirae;c__Nitrospira;o__Nitrospirales;                                                                                                      | 6.16E-05 | 3.08E-05 | 8.22E-05 | 1.05E-01 | 9.80E-01 | 1        | 1        | 0.75 | 1        | 0.37 | 1        | 2.00 |
| 0319-6A21                       | p__Nitrospirae;c__Nitrospira;o__Nitrospirales;f__0319-6A21;                                                                                         | 6.16E-05 | 2.05E-05 | 4.11E-05 | 3.58E-01 | 4.32E-01 | 0        | 6.63E-02 | 1.50 | 1        | 0.50 | 9.74E-01 | 3.00 |
| Nitrospiraceae                  | p__Nitrospirae;c__Nitrospira;o__Nitrospirales;f__Nitrospiraceae;                                                                                    | 6.16E-05 | 3.08E-05 | 4.11E-05 | 3.54E-01 | 9.69E-01 | 1        | 1        | 1.50 | 1        | 0.75 | 7.06E-01 | 2.00 |
| unidentified<br>Nitrospiraceae  | p__Nitrospirae;c__Nitrospira;o__Nitrospirales;f__Nitrospiraceae;g__unidentified_Nitrospiraceae;                                                     | 6.16E-05 | 2.05E-05 | 9.24E-05 | 2.99E-01 | 8.19E-01 | 0        | 1        | 0.67 | 8.96E-01 | 0.22 | 8.62E-01 | 3.00 |
| Planctomycetes                  | p__Planctomycetes;                                                                                                                                  | 6.16E-05 | 0.000205 | 6.16E-05 | 9.14E-01 | 7.86E-01 | 7.54E-02 | 8.81E-01 | 1.00 | 1        | 3.33 | 2.73E-01 | 0.30 |
| OM190                           | p__Planctomycetes;c__OM190;                                                                                                                         | 4.11E-05 | 2.05E-05 | 4.11E-05 | 5.39E-01 | 6.04E-01 | 0        | 9.22E-01 | 1.00 | NA       | 0.50 | NA       | 2.00 |
| Planctomycetacia                | p__Planctomycetes;c__Planctomycetacia;                                                                                                              | 6.16E-05 | 0.000164 | 9.24E-05 | 8.29E-01 | 7.38E-01 | 1        | 9.22E-01 | 0.67 | 1        | 1.78 | 2.65E-01 | 0.37 |

|                     |                                                                                                    |          |          |          |          |          |          |          |      |          |      |          |      |
|---------------------|----------------------------------------------------------------------------------------------------|----------|----------|----------|----------|----------|----------|----------|------|----------|------|----------|------|
| Planctomycetales    | p__Planctomycetes;c__Planctomycetacia;o__Planctomycetales;                                         | 6.16E-05 | 0.000164 | 9.24E-05 | 9.37E-01 | 8.95E-01 | 1        | 1        | 0.67 | 1        | 1.78 | 4.02E-01 | 0.37 |
| Planctomycetales    | p__Planctomycetes;c__Planctomycetacia;o__Planctomycetales;f__Planctomycetales;                     | 6.16E-05 | 0.000164 | 9.24E-05 | 9.37E-01 | 8.67E-01 | 1        | 1        | 0.67 | 1        | 1.78 | 2.33E-01 | 0.37 |
| Proteobacteria      | p__Proteobacteria;                                                                                 | 0.39346  | 0.440681 | 0.591114 | 2.86E-05 | 9.09E-06 | 3.60E-03 | 3.73E-03 | 0.67 | 7.01E-02 | 0.75 | 1        | 0.89 |
| Alphaproteobacteria | p__Proteobacteria;c__Alphaproteobacteria;                                                          | 0.0038   | 0.003677 | 0.005967 | 1.28E-01 | 8.85E-02 | 7.43E-01 | 2.39E-01 | 0.64 | 9.92E-01 | 0.62 | 1        | 1.03 |
| Caulobacteriales    | p__Proteobacteria;c__Alphaproteobacteria;o__Caulobacteriales;                                      | 0.000637 | 0.000596 | 0.002537 | 1.08E-05 | 1.02E-04 | 9.28E-06 | 2.11E-01 | 0.25 | 4.45E-01 | 0.23 | 8.20E-01 | 1.07 |
| Caulobacteraceae    | p__Proteobacteria;c__Alphaproteobacteria;o__Caulobacteriales;f__Caulobacteraceae;                  | 0.000637 | 0.000575 | 0.002444 | 9.48E-06 | 1.20E-04 | 3.42E-06 | 2.65E-01 | 0.26 | 6.59E-01 | 0.24 | 7.06E-01 | 1.11 |
| Brevundimonas       | p__Proteobacteria;c__Alphaproteobacteria;o__Caulobacteriales;f__Caulobacteraceae;g__Brevundimonas; | 0.000431 | 0.000452 | 0.002342 | 8.12E-07 | 2.69E-06 | 1.40E-07 | 1.55E-01 | 0.18 | 5.16E-01 | 0.19 | 9.91E-01 | 0.95 |
| Caulobacter         | p__Proteobacteria;c__Alphaproteobacteria;o__Caulobacteriales;f__Caulobacteraceae;g__Caulobacter;   | 8.22E-05 | 6.16E-05 | 4.11E-05 | 7.36E-03 | 2.65E-03 | 9.03E-06 | 2.39E-01 | 2.00 | 6.01E-01 | 1.50 | 6.92E-01 | 1.33 |
| Phenylobacterium    | p__Proteobacteria;c__Alphaproteobacteria;o__Caulobacteriales;                                      | 6.16E-05 | 4.11E-05 | 6.16E-05 | 5.78E-01 | 7.05E-01 | 1        | 1        | 1.00 | 8.37E-01 | 0.67 | 9.69E-01 | 1.50 |

|                   |                                                                                          |          |          |          |          |          |          |          |      |          |      |          |      |
|-------------------|------------------------------------------------------------------------------------------|----------|----------|----------|----------|----------|----------|----------|------|----------|------|----------|------|
|                   | ales;f__Caulobacteraceae;g__Phenyllobacterium;                                           |          |          |          |          |          |          |          |      |          |      |          |      |
| Hyphomonadaceae   | p__Proteobacteria;c__Alphaproteobacteria;o__Caulobacterales;f__Hyphomonadaceae;          | 2.05E-05 | 2.05E-05 | 4.11E-05 | 5.77E-01 | 5.14E-01 | 1        | 1        | 0.50 | 1        | 0.50 | 1        | 1.00 |
| Rhizobiales       | p__Proteobacteria;c__Alphaproteobacteria;o__Rhizobiales;                                 | 0.00113  | 0.002198 | 0.000883 | 4.52E-03 | 9.95E-01 | 3.22E-05 | 9.20E-01 | 1.28 | 7.49E-02 | 2.49 | 2.51E-01 | 0.51 |
| Bartonellaceae    | p__Proteobacteria;c__Alphaproteobacteria;o__Rhizobiales;f__Bartonellaceae;               | 0.000123 | 0        | 6.16E-05 | 5.82E-02 | 8.50E-02 | 0        | 5.38E-01 | 2.00 | NA       | NA   | NA       | NA   |
| Bartonella        | p__Proteobacteria;c__Alphaproteobacteria;o__Rhizobiales;f__Bartonellaceae;g__Bartonella; | 0.000123 | 0        | 6.16E-05 | 5.60E-02 | 6.75E-02 | 0        | 4.18E-01 | 2.00 | NA       | NA   | NA       | NA   |
| Bradyrhizobiaceae | p__Proteobacteria;c__Alphaproteobacteria;o__Rhizobiales;f__Bradyrhizobiaceae;            | 0.000123 | 6.16E-05 | 0.000103 | 6.02E-02 | 7.07E-01 | 1        | 1        | 1.20 | 5.29E-01 | 0.60 | 1        | 2.00 |
| Bosea             | p__Proteobacteria;c__Alphaproteobacteria;o__Rhizobiales;f__Bradyrhizobiaceae;g__Bosea;   | 6.16E-05 | 3.08E-05 | 4.11E-05 | 2.05E-01 | 2.56E-01 | 1        | 5.21E-01 | 1.50 | 9.96E-01 | 0.75 | 4.46E-01 | 2.00 |
| Brucellaceae      | p__Proteobacteria;c__Alphaproteobacteria;o__Rhizobiales;f__Brucellaceae;                 | 4.11E-05 | 4.11E-05 | 6.16E-05 | 3.59E-01 | 3.06E-01 | 1        | 3.46E-01 | 0.67 | 8.13E-01 | 0.67 | 7.92E-01 | 1.00 |

|                         |                                                                                                     |          |          |          |          |          |          |          |      |          |      |          |      |
|-------------------------|-----------------------------------------------------------------------------------------------------|----------|----------|----------|----------|----------|----------|----------|------|----------|------|----------|------|
| Brucella                | p__Proteobacteria;c__Alphaproteobacteria;o__Rhizobiales;f__Brucellaceae;g__Brucella;                | 4.11E-05 | 4.11E-05 | 6.16E-05 | 3.45E-01 | 2.69E-01 | 1        | 4.06E-01 | 0.67 | 7.68E-01 | 0.67 | 8.62E-01 | 1.00 |
| Hyphomicrobia<br>ceae   | p__Proteobacteria;c__Alphaproteobacteria;o__Rhizobiales;f__Hyphomicrobiaceae;                       | 8.22E-05 | 4.11E-05 | 0.000103 | 5.82E-02 | 7.11E-01 | 7.69E-01 | 8.06E-01 | 0.80 | 7.76E-01 | 0.40 | 3.70E-01 | 2.00 |
| Devosia                 | p__Proteobacteria;c__Alphaproteobacteria;o__Rhizobiales;f__Hyphomicrobiaceae;g__Devosia;            | 4.11E-05 | 4.11E-05 | 0.000267 | 6.64E-03 | 4.16E-03 | 7.12E-03 | 6.13E-01 | 0.15 | 1        | 0.15 | 9.91E-01 | 1.00 |
| Hyphomicrobiu<br>m      | p__Proteobacteria;c__Alphaproteobacteria;o__Rhizobiales;f__Hyphomicrobiaceae;g__Hyphomicrobium;     | 0.000123 | 4.11E-05 | 4.11E-05 | 6.39E-04 | 4.06E-04 | 7.57E-03 | 4.43E-02 | 3.00 | 1        | 1.00 | 1        | 3.00 |
| Pedomicrobium           | p__Proteobacteria;c__Alphaproteobacteria;o__Rhizobiales;f__Hyphomicrobiaceae;g__Pedomicrobium;      | 4.11E-05 | 2.05E-05 | 0.000411 | 6.02E-02 | 1.39E-01 | 0        | 7.71E-01 | 0.10 | NA       | 0.05 | NA       | 2.00 |
| Methylobacteria<br>ceae | p__Proteobacteria;c__Alphaproteobacteria;o__Rhizobiales;f__Methylobacteriaceae;                     | 0.000431 | 0.001664 | 0.000288 | 8.58E-10 | 3.48E-01 | 6.35E-16 | 1        | 1.50 | 2.79E-02 | 5.79 | 6.01E-03 | 0.26 |
| Methylobacteriu<br>m    | p__Proteobacteria;c__Alphaproteobacteria;o__Rhizobiales;f__Methylobacteriaceae;g__Methylobacterium; | 0.00039  | 0.001664 | 0.000288 | 1.42E-09 | 3.66E-01 | 1.05E-14 | 9.65E-01 | 1.36 | 3.70E-03 | 5.79 | 4.02E-03 | 0.23 |

|                          |                                                                                                        |          |          |          |          |          |          |          |      |    |      |          |      |
|--------------------------|--------------------------------------------------------------------------------------------------------|----------|----------|----------|----------|----------|----------|----------|------|----|------|----------|------|
| Microvirga               | p__Proteobacteria;c__Alphaproteobacteria;o__Rhizobiales;f__Methylobacteriaceae;g__Microvirga;          | 4.11E-05 | 2.05E-05 | 4.11E-05 | 6.53E-01 | 9.29E-01 | 0        | 9.65E-01 | 1.00 | NA | 0.50 | NA       | 2.00 |
| Rhizobiaceae             | p__Proteobacteria;c__Alphaproteobacteria;o__Rhizobiales;f__Rhizobiaceae;                               | 6.16E-05 | 4.11E-05 | 6.16E-05 | 9.65E-02 | 2.76E-01 | 2.95E-02 | 1        | 1.00 | 1  | 0.67 | 7.06E-01 | 1.50 |
| Ensifer                  | p__Proteobacteria;c__Alphaproteobacteria;o__Rhizobiales;f__Rhizobiaceae;g__Ensifer;                    | 4.11E-05 | 2.05E-05 | 2.05E-05 | 7.77E-01 | 6.23E-01 | 1        | 1        | 2.00 | 1  | 1.00 | 1        | 2.00 |
| Rhizobium                | p__Proteobacteria;c__Alphaproteobacteria;o__Rhizobiales;f__Rhizobiaceae;g__Rhizobium;                  | 4.11E-05 | 4.11E-05 | 6.16E-05 | 1.59E-01 | 1.27E-01 | 4.52E-02 | 1        | 0.67 | 1  | 0.67 | 1        | 1.00 |
| unidentified Rhizobiales | p__Proteobacteria;c__Alphaproteobacteria;o__Rhizobiales;f__unidentified_Rhizobiales;                   | 4.11E-05 | 2.05E-05 | 4.11E-05 | 2.99E-01 | 3.04E-01 | 1        | 7.46E-01 | 1.00 | 1  | 0.50 | 1        | 2.00 |
| Rhizomicrobium           | p__Proteobacteria;c__Alphaproteobacteria;o__Rhizobiales;f__unidentified_Rhizobiales;g__Rhizomicrobium; | 4.11E-05 | 2.05E-05 | 3.08E-05 | 4.40E-01 | 4.27E-01 | 1        | 6.36E-01 | 1.33 | 1  | 0.67 | 8.62E-01 | 2.00 |
| Xanthobacteraceae        | p__Proteobacteria;c__Alphaproteobacteria;o__Rhizobiales;f__Xanthobacteraceae;                          | 6.16E-05 | 2.05E-05 | 4.11E-05 | 2.30E-01 | 9.18E-01 | 1        | 1        | 1.50 | 1  | 0.50 | 1        | 3.00 |
| Pseudolabrys             | p__Proteobacteria;c__Alphaproteobacteria;o__Rhizobiales;                                               | 4.11E-05 | 2.05E-05 | 0.000452 | 4.02E-01 | 6.73E-01 | 0        | 1.69E-01 | 0.09 | NA | 0.05 | NA       | 2.00 |

|                  |                                                                                                      |          |          |          |          |          |          |          |      |          |      |          |      |
|------------------|------------------------------------------------------------------------------------------------------|----------|----------|----------|----------|----------|----------|----------|------|----------|------|----------|------|
|                  | f__Xanthobacteraceae;g__Pseudolabrys;                                                                |          |          |          |          |          |          |          |      |          |      |          |      |
| Rhodobacterales  | p__Proteobacteria;c__Alphaproteobacteria;o__Rhodobacterales;                                         | 0.000164 | 6.16E-05 | 0.000277 | 1.63E-04 | 2.36E-01 | 4.12E-01 | 6.55E-01 | 0.59 | 6.24E-02 | 0.22 | 4.33E-02 | 2.67 |
| Rhodobacteraceae | p__Proteobacteria;c__Alphaproteobacteria;o__Rhodobacterales;f__Rhodobacteraceae;                     | 0.000164 | 6.16E-05 | 0.000277 | 1.64E-04 | 2.43E-01 | 2.40E-01 | 6.60E-01 | 0.59 | 2.79E-02 | 0.22 | 4.54E-02 | 2.67 |
| Amaricoccus      | p__Proteobacteria;c__Alphaproteobacteria;o__Rhodobacterales;f__Rhodobacteraceae;g__Amaricoccus;      | 4.11E-05 | 3.08E-05 | 0.000164 | 1.11E-02 | 1.72E-02 | 2.53E-02 | 3.87E-01 | 0.25 | 1        | 0.19 | 1        | 1.33 |
| Falsirhodobacter | p__Proteobacteria;c__Alphaproteobacteria;o__Rhodobacterales;f__Rhodobacteraceae;g__Falsirhodobacter; | 2.05E-05 | 2.05E-05 | 3.08E-05 | 9.71E-01 | 9.51E-01 | 1        | 1        | 0.67 | 1        | 0.67 | 1        | 1.00 |
| Loktanella       | p__Proteobacteria;c__Alphaproteobacteria;o__Rhodobacterales;f__Rhodobacteraceae;g__Loktanella;       | 4.11E-05 | 0        | 2.05E-05 | 2.36E-01 | 2.93E-01 | 0        | 3.13E-01 | 2.00 | NA       | NA   | NA       | NA   |
| Marivita         | p__Proteobacteria;c__Alphaproteobacteria;o__Rhodobacterales;f__Rhodobacteraceae;g__Marivita;         | 4.11E-05 | 0        | 4.11E-05 | 2.99E-01 | 3.66E-01 | 0        | 6.33E-01 | 1.00 | NA       | NA   | NA       | NA   |
| Paracoccus       | p__Proteobacteria;c__Alphaproteobacteria;o__Rhodobacter                                              | 6.16E-05 | 4.11E-05 | 6.16E-05 | 8.29E-01 | 9.90E-01 | 1        | 9.61E-01 | 1.00 | 9.47E-01 | 0.67 | 1        | 1.50 |



|                   |                                                                                                      |          |          |          |          |          |          |          |      |          |      |          |      |
|-------------------|------------------------------------------------------------------------------------------------------|----------|----------|----------|----------|----------|----------|----------|------|----------|------|----------|------|
|                   | ales;f__Rhodobacteraceae;g__Paracoccus;                                                              |          |          |          |          |          |          |          |      |          |      |          |      |
| Rubellimicrobium  | p__Proteobacteria;c__Alphaproteobacteria;o__Rhodobacterales;f__Rhodobacteraceae;g__Rubellimicrobium; | 4.11E-05 | 2.05E-05 | 4.11E-05 | 3.07E-01 | 5.15E-01 | 1        | 7.31E-01 | 1.00 | 1        | 0.50 | 1        | 2.00 |
| Rhodospirillales  | p__Proteobacteria;c__Alphaproteobacteria;o__Rhodospirillales;                                        | 9.24E-05 | 0.000103 | 0.000113 | 3.18E-01 | 3.76E-01 | 1        | 4.50E-01 | 0.82 | 1        | 0.91 | 1        | 0.90 |
| Acetobacteraceae  | p__Proteobacteria;c__Alphaproteobacteria;o__Rhodospirillales;f__Acetobacteraceae;                    | 4.11E-05 | 4.11E-05 | 0.000185 | 1.81E-03 | 5.45E-03 | 1.54E-02 | 5.71E-01 | 0.22 | 8.14E-01 | 0.22 | 1        | 1.00 |
| Gluconobacter     | p__Proteobacteria;c__Alphaproteobacteria;o__Rhodospirillales;f__Acetobacteraceae;g__Gluconobacter;   | 2.05E-05 | 4.11E-05 | 0.000555 | 2.39E-02 | 7.10E-03 | 4.07E-03 | 9.65E-01 | 0.04 | 4.82E-03 | 0.07 | 1        | 0.50 |
| DA111             | p__Proteobacteria;c__Alphaproteobacteria;o__Rhodospirillales;f__DA111;                               | 8.22E-05 | 5.14E-05 | 4.11E-05 | 7.25E-03 | 2.51E-03 | 1.76E-02 | 7.23E-01 | 2.00 | 7.76E-01 | 1.25 | 3.55E-01 | 1.60 |
| Rhodospirillaceae | p__Proteobacteria;c__Alphaproteobacteria;o__Rhodospirillales;f__Rhodospirillaceae;                   | 4.11E-05 | 4.11E-05 | 5.14E-05 | 5.46E-01 | 8.79E-01 | 1        | 1        | 0.80 | 1        | 0.80 | 8.35E-01 | 1.00 |
| Skermanella       | p__Proteobacteria;c__Alphaproteobacteria;o__Rhodospirillales;f__Rhodospirillaceae;g__Skermanella;    | 4.11E-05 | 2.05E-05 | 4.11E-05 | 3.37E-01 | 9.78E-01 | 1        | 1        | 1.00 | 1        | 0.50 | 9.14E-01 | 2.00 |

|                               |                                                                                                             |          |          |          |          |          |   |          |      |          |      |          |      |
|-------------------------------|-------------------------------------------------------------------------------------------------------------|----------|----------|----------|----------|----------|---|----------|------|----------|------|----------|------|
| unidentified Rhodospirillales | p__Proteobacteria;c__Alphaproteobacteria;o__Rhodospirillales;f__unidentified_Rhodospirillales;              | 4.11E-05 | 2.05E-05 | 6.16E-05 | 5.66E-01 | 9.44E-01 | 1 | 1        | 0.67 | 1        | 0.33 | 1        | 2.00 |
| Reyranela                     | p__Proteobacteria;c__Alphaproteobacteria;o__Rhodospirillales;f__unidentified_Rhodospirillales;g__Reyranela; | 4.11E-05 | 2.05E-05 | 6.16E-05 | 4.84E-01 | 8.42E-01 | 1 | 1        | 0.67 | 1        | 0.33 | 6.51E-01 | 2.00 |
| Rickettsiales                 | p__Proteobacteria;c__Alphaproteobacteria;o__Rickettsiales;                                                  | 8.22E-05 | 4.11E-05 | 7.19E-05 | 2.76E-01 | 6.00E-01 | 1 | 2.11E-01 | 1.14 | 7.63E-01 | 0.57 | 5.54E-01 | 2.00 |
| Anaplasmataceae               | p__Proteobacteria;c__Alphaproteobacteria;o__Rickettsiales;f__Anaplasmataceae;                               | 4.11E-05 | 0        | 6.16E-05 | 3.07E-01 | 3.94E-01 | 0 | 1        | 0.67 | NA       | NA   | NA       | NA   |
| Wolbachia                     | p__Proteobacteria;c__Alphaproteobacteria;o__Rickettsiales;f__Anaplasmataceae;g__Wolbachia;                  | 4.11E-05 | 0        | 6.16E-05 | 2.99E-01 | 3.49E-01 | 0 | 1        | 0.67 | NA       | NA   | NA       | NA   |
| Mitochondria                  | p__Proteobacteria;c__Alphaproteobacteria;o__Rickettsiales;f__Mitochondria;                                  | 4.11E-05 | 4.11E-05 | 6.16E-05 | 8.31E-01 | 8.37E-01 | 1 | 1        | 0.67 | 1        | 0.67 | 8.57E-01 | 1.00 |
| unidentified Mitochondria     | p__Proteobacteria;c__Alphaproteobacteria;o__Rickettsiales;f__Mitochondria;g__unidentified_Mitochondria;     | 4.11E-05 | 4.11E-05 | 6.16E-05 | 8.29E-01 | 8.25E-01 | 1 | 1        | 0.67 | 1        | 0.67 | 9.91E-01 | 1.00 |

|                    |                                                                                                           |          |          |          |          |          |          |          |      |          |      |          |      |
|--------------------|-----------------------------------------------------------------------------------------------------------|----------|----------|----------|----------|----------|----------|----------|------|----------|------|----------|------|
| Sphingomonadales   | p__Proteobacteria;c__Alphaproteobacteria;o__Sphingomonadales;                                             | 0.000965 | 0.000246 | 0.000288 | 1.04E-06 | 1.49E-04 | 8.42E-09 | 6.04E-03 | 3.36 | 7.14E-01 | 0.86 | 3.86E-02 | 3.92 |
| Erythrobacteraceae | p__Proteobacteria;c__Alphaproteobacteria;o__Sphingomonadales;f__Erythrobacteraceae;                       | 4.11E-05 | 2.05E-05 | 4.11E-05 | 2.48E-01 | 8.04E-01 | 1        | 1        | 1.00 | 9.72E-01 | 0.50 | 8.76E-01 | 2.00 |
| Altererythrobacter | p__Proteobacteria;c__Alphaproteobacteria;o__Sphingomonadales;f__Erythrobacteraceae;g__Altererythrobacter; | 2.05E-05 | 2.05E-05 | 4.11E-05 | 2.06E-01 | 1.72E-01 | 1        | 1        | 0.50 | 1        | 0.50 | 1        | 1.00 |
| Sphingomonadaceae  | p__Proteobacteria;c__Alphaproteobacteria;o__Sphingomonadales;f__Sphingomonadaceae;                        | 0.000832 | 0.000195 | 0.000288 | 1.60E-06 | 1.57E-04 | 5.45E-08 | 1.60E-02 | 2.89 | 7.76E-01 | 0.68 | 2.69E-02 | 4.26 |
| Blastomonas        | p__Proteobacteria;c__Alphaproteobacteria;o__Sphingomonadales;f__Sphingomonadaceae;g__Blastomonas;         | 0.00037  | 9.24E-05 | 0.000123 | 5.38E-07 | 5.01E-04 | 5.10E-10 | 1.76E-01 | 3.00 | 3.62E-01 | 0.75 | 7.08E-02 | 4.00 |
| Novosphingobium    | p__Proteobacteria;c__Alphaproteobacteria;o__Sphingomonadales;f__Sphingomonadaceae;g__Novosphingobium;     | 7.19E-05 | 3.08E-05 | 2.05E-05 | 2.10E-02 | 1.41E-02 | 1        | 5.21E-01 | 3.51 | 1        | 1.50 | 1        | 2.33 |
| Sphingomonas       | p__Proteobacteria;c__Alphaproteobacteria;o__Sphingomonadales;f__Sphingomonadaceae;g__Sphingomonas;        | 0.000144 | 0.000103 | 0.000123 | 1.37E-01 | 2.55E-01 | 1        | 4.83E-01 | 1.17 | 6.01E-01 | 0.83 | 3.08E-02 | 1.40 |

|                    |                                                                                                   |          |          |          |          |          |          |          |      |          |      |          |      |
|--------------------|---------------------------------------------------------------------------------------------------|----------|----------|----------|----------|----------|----------|----------|------|----------|------|----------|------|
| Spingopyxis        | p__Proteobacteria;c__Alphaproteobacteria;o__Sphingomonadales;f__Sphingomonadaceae;g__Spingopyxis; | 4.11E-05 | 4.11E-05 | 6.16E-05 | 1.17E-01 | 9.72E-02 | 1        | 5.21E-01 | 0.67 | 8.37E-01 | 0.67 | 1        | 1.00 |
| Betaproteobacteria | p__Proteobacteria;c__Betaproteobacteria;                                                          | 0.182558 | 0.128702 | 0.152662 | 2.95E-01 | 7.84E-01 | 1        | 5.34E-01 | 1.20 | 1        | 0.84 | 2.65E-01 | 1.42 |
| Burkholderiales    | p__Proteobacteria;c__Betaproteobacteria;o__Burkholderiales;                                       | 0.029762 | 0.01713  | 0.027657 | 3.40E-03 | 2.04E-01 | 1        | 8.30E-01 | 1.08 | 2.48E-01 | 0.62 | 1.34E-02 | 1.74 |
| Alcaligenaceae     | p__Proteobacteria;c__Betaproteobacteria;o__Burkholderiales;f__Alcaligenaceae;                     | 0.000123 | 8.22E-05 | 0.000103 | 3.89E-01 | 5.49E-01 | 1        | 1        | 1.20 | 1        | 0.80 | 7.06E-01 | 1.50 |
| Burkholderiaceae   | p__Proteobacteria;c__Betaproteobacteria;o__Burkholderiales;f__Burkholderiaceae;                   | 0.028612 | 0.013187 | 0.014809 | 1.21E-04 | 1.57E-04 | 2.67E-02 | 6.45E-02 | 1.93 | 1        | 0.89 | 2.02E-02 | 2.17 |
| Burkholderia       | p__Proteobacteria;c__Betaproteobacteria;o__Burkholderiales;f__Burkholderiaceae;g__Burkholderia;   | 4.11E-05 | 4.11E-05 | 4.11E-05 | 6.16E-01 | 6.21E-01 | 1        | 1        | 1.00 | 5.67E-01 | 1.00 | 1        | 1.00 |
| Cupriavidus        | p__Proteobacteria;c__Betaproteobacteria;o__Burkholderiales;f__Burkholderiaceae;g__Cupriavidus;    | 0.000616 | 0.000411 | 0.000205 | 4.48E-05 | 9.17E-06 | 6.64E-05 | 3.78E-03 | 3.00 | 2.35E-02 | 2.00 | 8.62E-01 | 1.50 |
| Lautropia          | p__Proteobacteria;c__Betaproteobacteria;o__Burkholderiales                                        | 0.027154 | 0.01292  | 0.014193 | 1.99E-04 | 3.35E-04 | 2.15E-02 | 3.61E-02 | 1.91 | 1        | 0.91 | 4.02E-03 | 2.10 |

|                |                                                                                               |          |          |          |          |          |          |          |      |          |      |          |      |
|----------------|-----------------------------------------------------------------------------------------------|----------|----------|----------|----------|----------|----------|----------|------|----------|------|----------|------|
|                | s;f__Burkholderiaceae;g__Lautropia;                                                           |          |          |          |          |          |          |          |      |          |      |          |      |
| Ralstonia      | p__Proteobacteria;c__Betaproteobacteria;o__Burkholderiales;f__Burkholderiaceae;g__Ralstonia;  | 6.16E-05 | 2.05E-05 | 4.11E-05 | 2.57E-02 | 1.78E-01 | 1        | 2.97E-01 | 1.50 | 5.38E-01 | 0.50 | 1        | 3.00 |
| Comamonadaceae | p__Proteobacteria;c__Betaproteobacteria;o__Burkholderiales;f__Comamonadaceae;                 | 0.00113  | 0.00076  | 0.003019 | 9.00E-08 | 1.37E-05 | 2.74E-07 | 2.77E-03 | 0.37 | 6.59E-01 | 0.25 | 8.35E-01 | 1.49 |
| Acidovorax     | p__Proteobacteria;c__Betaproteobacteria;o__Burkholderiales;f__Comamonadaceae;g__Acidovorax;   | 0.000185 | 0.000164 | 0.001438 | 1.23E-06 | 3.32E-06 | 1.30E-07 | 4.22E-03 | 0.13 | 4.40E-01 | 0.11 | 1        | 1.13 |
| Comamonas      | p__Proteobacteria;c__Betaproteobacteria;o__Burkholderiales;f__Comamonadaceae;g__Comamonas;    | 8.22E-05 | 6.16E-05 | 0.000575 | 4.37E-07 | 3.47E-05 | 9.66E-08 | 7.44E-02 | 0.14 | 6.70E-01 | 0.11 | 1        | 1.33 |
| Malikia        | p__Proteobacteria;c__Betaproteobacteria;o__Burkholderiales;f__Comamonadaceae;g__Malikia;      | 4.11E-05 | 4.11E-05 | 5.14E-05 | 9.41E-01 | 9.16E-01 | 1        | 8.34E-01 | 0.80 | 1        | 0.80 | 1        | 1.00 |
| Schlegelella   | p__Proteobacteria;c__Betaproteobacteria;o__Burkholderiales;f__Comamonadaceae;g__Schlegelella; | 4.11E-05 | 2.05E-05 | 4.11E-05 | 2.64E-01 | 5.72E-01 | 1        | 1        | 1.00 | 8.37E-01 | 0.50 | 1        | 2.00 |

|                   |                                                                                                      |          |          |          |          |          |          |          |      |          |      |          |      |
|-------------------|------------------------------------------------------------------------------------------------------|----------|----------|----------|----------|----------|----------|----------|------|----------|------|----------|------|
| Tepidimonas       | p__Proteobacteria;c__Betaproteobacteria;o__Burkholderiales;f__Comamonadaceae;g__Tepidimonas;         | 6.16E-05 | 4.11E-05 | 6.16E-05 | 3.04E-02 | 4.66E-01 | 1.12E-02 | 4.86E-01 | 1.00 | 1        | 0.67 | 3.58E-01 | 1.50 |
| Oxalobacteraceae  | p__Proteobacteria;c__Betaproteobacteria;o__Burkholderiales;f__Oxalobacteraceae;                      | 0.000164 | 0.000103 | 0.000842 | 1.09E-04 | 1.45E-03 | 1.52E-04 | 1.16E-01 | 0.20 | 1        | 0.12 | 1        | 1.60 |
| Duganella         | p__Proteobacteria;c__Betaproteobacteria;o__Burkholderiales;f__Oxalobacteraceae;g__Duganella;         | 4.11E-05 | 2.05E-05 | 0.000472 | 4.24E-03 | 1.41E-02 | 9.42E-02 | 4.59E-02 | 0.09 | 5.54E-01 | 0.04 | 1        | 2.00 |
| Herbaspirillum    | p__Proteobacteria;c__Betaproteobacteria;o__Burkholderiales;f__Oxalobacteraceae;g__Herbaspirillum;    | 4.11E-05 | 4.11E-05 | 0.000113 | 1.75E-02 | 1.17E-02 | 1.93E-06 | 1        | 0.36 | 4.78E-01 | 0.36 | 9.91E-01 | 1.00 |
| Janthinobacterium | p__Proteobacteria;c__Betaproteobacteria;o__Burkholderiales;f__Oxalobacteraceae;g__Janthinobacterium; | 4.11E-05 | 4.11E-05 | 0.000411 | 2.12E-04 | 3.48E-04 | 4.87E-01 | 6.13E-01 | 0.10 | 6.01E-01 | 0.10 | 1        | 1.00 |
| Massilia          | p__Proteobacteria;c__Betaproteobacteria;o__Burkholderiales;f__Oxalobacteraceae;g__Massilia;          | 0.000123 | 8.22E-05 | 9.24E-05 | 1.75E-02 | 1.14E-02 | 5.73E-03 | 8.89E-01 | 1.33 | 1        | 0.89 | 1        | 1.50 |
| Hydrogenophiles   | p__Proteobacteria;c__Betaproteobacteria;o__Hydrogenophiales;                                         | 4.11E-05 | 2.05E-05 | 4.11E-05 | 3.03E-01 | 9.41E-01 | 1        | 1        | 1.00 | 7.14E-01 | 0.50 | 7.91E-01 | 2.00 |

|                    |                                                                                                       |          |          |          |          |          |          |          |      |          |      |          |      |
|--------------------|-------------------------------------------------------------------------------------------------------|----------|----------|----------|----------|----------|----------|----------|------|----------|------|----------|------|
| Hydrogenophilaceae | p__Proteobacteria;c__Betaproteobacteria;o__Hydrogenophiales;f__Hydrogenophilaceae;                    | 4.11E-05 | 2.05E-05 | 4.11E-05 | 2.99E-01 | 9.01E-01 | 1        | 1        | 1.00 | 8.27E-01 | 0.50 | 7.72E-01 | 2.00 |
| Hydrogenophilus    | p__Proteobacteria;c__Betaproteobacteria;o__Hydrogenophiales;f__Hydrogenophilaceae;g__Hydrogenophilus; | 4.11E-05 | 2.05E-05 | 4.11E-05 | 1.58E-01 | 7.19E-01 | 1        | 1        | 1.00 | 6.05E-01 | 0.50 | 8.63E-01 | 2.00 |
| Methylophilales    | p__Proteobacteria;c__Betaproteobacteria;o__Methylophilales;                                           | 4.11E-05 | 3.08E-05 | 4.11E-05 | 3.91E-01 | 2.67E-01 | 1        | 1        | 1.00 | 1        | 0.75 | 9.87E-01 | 1.33 |
| Methylophilaceae   | p__Proteobacteria;c__Betaproteobacteria;o__Methylophilales;f__Methylophilaceae;                       | 4.11E-05 | 3.08E-05 | 4.11E-05 | 3.89E-01 | 2.83E-01 | 1        | 1        | 1.00 | 1        | 0.75 | 1        | 1.33 |
| Neisseriales       | p__Proteobacteria;c__Betaproteobacteria;o__Neisseriales;                                              | 0.119172 | 0.091833 | 0.102986 | 5.40E-01 | 8.59E-01 | 1        | 1        | 1.16 | 7.43E-01 | 0.89 | 3.18E-01 | 1.30 |
| Neisseriaceae      | p__Proteobacteria;c__Betaproteobacteria;o__Neisseriales;f__Neisseriaceae;                             | 0.119172 | 0.091833 | 0.102986 | 5.57E-01 | 8.31E-01 | 2.90E-01 | 1        | 1.16 | 8.35E-01 | 0.89 | 2.82E-01 | 1.30 |
| Alysiella          | p__Proteobacteria;c__Betaproteobacteria;o__Neisseriales;f__Neisseriaceae;g__Alysiella;                | 8.22E-05 | 6.16E-05 | 0.000103 | 5.60E-02 | 3.48E-01 | 1        | 8.89E-01 | 0.80 | 5.54E-01 | 0.60 | 7.41E-01 | 1.33 |
| Eikenella          | p__Proteobacteria;c__Betaproteobacteria;o__Neisseriales;f__Neisseriaceae;g__Eikenella;                | 6.16E-05 | 0.000123 | 8.22E-05 | 6.64E-03 | 6.75E-02 | 8.99E-04 | 2.53E-01 | 0.75 | 7.54E-01 | 1.50 | 3.59E-02 | 0.50 |

|                                |                                                                                                                     |          |          |          |          |          |          |          |      |          |      |          |      |
|--------------------------------|---------------------------------------------------------------------------------------------------------------------|----------|----------|----------|----------|----------|----------|----------|------|----------|------|----------|------|
| Kingella                       | p__Proteobacteria;c__Betaproteobacteria;o__Neisseriales;f__Neisseriaceae;g__Kingella;                               | 0.000185 | 0.000185 | 8.22E-05 | 4.61E-05 | 1.03E-03 | 1.36E-05 | 1.74E-04 | 2.25 | 1.32E-01 | 2.25 | 1        | 1.00 |
| Neisseria                      | p__Proteobacteria;c__Betaproteobacteria;o__Neisseriales;f__Neisseriaceae;g__Neisseria;                              | 0.114099 | 0.08904  | 0.094308 | 4.50E-01 | 5.08E-01 | 1        | 9.65E-01 | 1.21 | 6.01E-01 | 0.94 | 2.49E-01 | 1.28 |
| Simonsiella                    | p__Proteobacteria;c__Betaproteobacteria;o__Neisseriales;f__Neisseriaceae;g__Simonsiella;                            | 4.11E-05 | 2.05E-05 | 0.000144 | 3.75E-05 | 9.21E-04 | 5.30E-04 | 5.40E-02 | 0.29 | 4.88E-01 | 0.14 | 4.08E-01 | 2.00 |
| Nitrosomonadales               | p__Proteobacteria;c__Betaproteobacteria;o__Nitrosomonadales;                                                        | 6.16E-05 | 2.05E-05 | 4.11E-05 | 5.35E-02 | 6.49E-01 | 1        | 6.28E-01 | 1.50 | 1        | 0.50 | 1        | 3.00 |
| Nitrosomonadaceae              | p__Proteobacteria;c__Betaproteobacteria;o__Nitrosomonadales;f__Nitrosomonadaceae;                                   | 6.16E-05 | 2.05E-05 | 4.11E-05 | 5.62E-02 | 6.64E-01 | 1        | 6.17E-01 | 1.50 | 1        | 0.50 | 1        | 3.00 |
| unidentified Nitrosomonadaceae | p__Proteobacteria;c__Betaproteobacteria;o__Nitrosomonadales;f__Nitrosomonadaceae;g__unidentified_Nitrosomonadaceae; | 4.11E-05 | 0.000164 | 3.08E-05 | 7.40E-01 | 9.68E-01 | 0        | 1        | 1.33 | NA       | 5.34 | NA       | 0.25 |
| Rhodocyclales                  | p__Proteobacteria;c__Betaproteobacteria;o__Rhodocyclales;                                                           | 0.000123 | 4.11E-05 | 8.22E-05 | 1.46E-04 | 5.15E-02 | 7.97E-02 | 6.40E-01 | 1.50 | 7.43E-01 | 0.50 | 1.44E-01 | 3.00 |



|                     |                                                                                                  |          |          |          |          |          |          |          |      |          |        |          |      |
|---------------------|--------------------------------------------------------------------------------------------------|----------|----------|----------|----------|----------|----------|----------|------|----------|--------|----------|------|
| Rhodocyclaceae      | p__Proteobacteria;c__Betaproteobacteria;o__Rhodocyclales;f__Rhodocyclaceae;                      | 0.000123 | 4.11E-05 | 8.22E-05 | 1.37E-04 | 4.61E-02 | 1.35E-01 | 6.17E-01 | 1.50 | 8.14E-01 | 0.50   | 1.55E-01 | 3.00 |
| Methyloversatilis   | p__Proteobacteria;c__Betaproteobacteria;o__Rhodocyclales;f__Rhodocyclaceae;g__Methyloversatilis; | 6.16E-05 | 4.11E-05 | 2.05E-05 | 4.83E-04 | 3.04E-04 | 6.76E-04 | 2.87E-02 | 3.00 | 9.47E-01 | 2.00   | 1        | 1.50 |
| Propionivibrio      | p__Proteobacteria;c__Betaproteobacteria;o__Rhodocyclales;f__Rhodocyclaceae;g__Propionivibrio;    | 6.16E-05 | 4.11E-05 | 8.22E-05 | 1.79E-02 | 8.91E-01 | 3.92E-01 | 9.63E-01 | 0.75 | 7.68E-01 | 0.50   | 3.59E-02 | 1.50 |
| Thauera             | p__Proteobacteria;c__Betaproteobacteria;o__Rhodocyclales;f__Rhodocyclaceae;g__Thauera;           | 2.05E-05 | 4.11E-05 | 4.11E-05 | 7.80E-01 | 5.94E-01 | 1        | 9.45E-01 | 0.50 | 1        | 1.00   | 1        | 0.50 |
| Zoogloea            | p__Proteobacteria;c__Betaproteobacteria;o__Rhodocyclales;f__Rhodocyclaceae;g__Zoogloea;          | 2.05E-05 | 0.016473 | 2.05E-05 | 2.65E-01 | 7.09E-01 | 0        | 1        | 1.00 | NA       | 803.56 | NA       | 0.00 |
| SC-I-84             | p__Proteobacteria;c__Betaproteobacteria;o__SC-I-84;                                              | 6.16E-05 | 2.05E-05 | 6.16E-05 | 3.03E-01 | 9.95E-01 | 1        | 1        | 1.00 | 1        | 0.33   | 1        | 3.00 |
| TRA3-20             | p__Proteobacteria;c__Betaproteobacteria;o__TRA3-20;                                              | 4.11E-05 | 2.05E-05 | 6.16E-05 | 3.03E-01 | 9.80E-01 | 1        | 1        | 0.67 | 1        | 0.33   | 1        | 2.00 |
| Deltaproteobacteria | p__Proteobacteria;c__Deltaproteobacteria;                                                        | 0.000318 | 0.000103 | 0.000164 | 1.91E-07 | 1.18E-05 | 2.02E-02 | 7.48E-03 | 1.94 | 1        | 0.63   | 4.41E-02 | 3.10 |

|                     |                                                                                                     |          |          |          |          |          |          |          |      |          |      |          |      |
|---------------------|-----------------------------------------------------------------------------------------------------|----------|----------|----------|----------|----------|----------|----------|------|----------|------|----------|------|
| Bdellovibrionales   | p__Proteobacteria;c__Deltaproteobacteria;o__Bdellovibrionales;                                      | 4.11E-05 | 4.11E-05 | 2.05E-05 | 9.59E-01 | 9.91E-01 | 9.54E-01 | 1        | 2.00 | 1        | 2.00 | 1        | 1.00 |
| Desulfobacterales   | p__Proteobacteria;c__Deltaproteobacteria;o__Desulfobacterales;                                      | 0.000144 | 6.16E-05 | 6.16E-05 | 1.65E-06 | 2.33E-06 | 1.92E-03 | 1.12E-04 | 2.33 | 1        | 1.00 | 1.24E-01 | 2.33 |
| Desulfobulbaceae    | p__Proteobacteria;c__Deltaproteobacteria;o__Desulfobacterales;f__Desulfobulbaceae;                  | 0.000123 | 6.16E-05 | 6.16E-05 | 1.57E-06 | 1.56E-06 | 4.34E-02 | 2.02E-06 | 2.00 | 8.43E-01 | 1.00 | 1.39E-01 | 2.00 |
| Desulfobulbus       | p__Proteobacteria;c__Deltaproteobacteria;o__Desulfobacterales;f__Desulfobulbaceae;g__Desulfobulbus; | 0.000123 | 6.16E-05 | 6.16E-05 | 1.45E-06 | 1.29E-06 | 9.65E-03 | 4.23E-04 | 2.00 | 7.54E-01 | 1.00 | 3.13E-01 | 2.00 |
| Nitrospinaceae      | p__Proteobacteria;c__Deltaproteobacteria;o__Desulfobacterales;f__Nitrospinaceae;                    | 4.11E-05 | 2.05E-05 | 4.11E-05 | 5.90E-01 | 8.31E-01 | 0        | 1        | 1.00 | NA       | 0.50 | NA       | 2.00 |
| Desulfovibrionales  | p__Proteobacteria;c__Deltaproteobacteria;o__Desulfovibrionales;                                     | 8.22E-05 | 4.11E-05 | 6.16E-05 | 7.67E-03 | 2.05E-01 | 1        | 2.11E-01 | 1.33 | 7.14E-01 | 0.67 | 8.82E-01 | 2.00 |
| Desulfovibrionaceae | p__Proteobacteria;c__Deltaproteobacteria;o__Desulfovibrionales;f__Desulfovibrionaceae;              | 8.22E-05 | 4.11E-05 | 6.16E-05 | 8.57E-03 | 5.70E-01 | 1        | 1        | 1.33 | 7.76E-01 | 0.67 | 7.92E-01 | 2.00 |
| Desulfovibrio       | p__Proteobacteria;c__Deltaproteobacteria;o__Desulfovibri                                            | 6.16E-05 | 4.11E-05 | 6.16E-05 | 7.26E-02 | 8.02E-01 | 1        | 1        | 1.00 | 7.63E-01 | 0.67 | 1        | 1.50 |

|                    |                                                                                                   |          |          |          |          |          |          |          |      |          |      |          |      |
|--------------------|---------------------------------------------------------------------------------------------------|----------|----------|----------|----------|----------|----------|----------|------|----------|------|----------|------|
|                    | onales;f__Desulfovibrionaceae;g__Desulfovibrio;                                                   |          |          |          |          |          |          |          |      |          |      |          |      |
| Desulfuromonadales | p__Proteobacteria;c__Deltaproteobacteria;o__Desulfuromonadales;                                   | 3.08E-05 | 4.11E-05 | 4.11E-05 | 8.08E-01 | 7.24E-01 | 0        | 1        | 0.75 | 1        | 1.00 | 8.20E-01 | 0.75 |
| GR-WP33-30         | p__Proteobacteria;c__Deltaproteobacteria;o__GR-WP33-30;                                           | 4.11E-05 | 4.11E-05 | 4.11E-05 | 2.21E-01 | 8.80E-01 | 1        | 9.19E-01 | 1.00 | 1        | 1.00 | 6.19E-01 | 1.00 |
| Myxococcales       | p__Proteobacteria;c__Deltaproteobacteria;o__Myxococcales;                                         | 6.16E-05 | 4.11E-05 | 4.11E-05 | 4.47E-01 | 3.65E-01 | 8.67E-01 | 6.16E-01 | 1.50 | 8.87E-01 | 1.00 | 1        | 1.50 |
| BIrii41            | p__Proteobacteria;c__Deltaproteobacteria;o__Myxococcales;f__BIrii41;                              | 2.05E-05 | 2.05E-05 | 0.000164 | 4.87E-02 | 6.18E-02 | 0        | 8.78E-01 | 0.12 | NA       | 0.12 | NA       | 1.00 |
| Cystobacteraceae   | p__Proteobacteria;c__Deltaproteobacteria;o__Myxococcales;f__Cystobacteraceae;                     | 8.22E-05 | 4.11E-05 | 0.000103 | 8.52E-01 | 8.99E-01 | 0        | 1        | 0.80 | NA       | 0.40 | NA       | 2.00 |
| Anaeromyxobacter   | p__Proteobacteria;c__Deltaproteobacteria;o__Myxococcales;f__Cystobacteraceae;g__Anaeromyxobacter; | 8.22E-05 | 4.11E-05 | 8.22E-05 | 8.52E-01 | 8.91E-01 | 0        | 1        | 1.00 | NA       | 0.50 | NA       | 2.00 |
| Haliangiaceae      | p__Proteobacteria;c__Deltaproteobacteria;o__Myxococcales;f__Haliangiaceae;                        | 5.14E-05 | 2.05E-05 | 4.11E-05 | 5.81E-01 | 8.33E-01 | 0        | 1        | 1.25 | NA       | 0.50 | NA       | 2.50 |
| Haliangium         | p__Proteobacteria;c__Deltaproteobacteria;o__Myxococcales;                                         | 5.14E-05 | 2.05E-05 | 4.11E-05 | 5.78E-01 | 8.19E-01 | 0        | 9.65E-01 | 1.25 | NA       | 0.50 | NA       | 2.50 |

|                       |                                                                                          |          |          |          |          |          |          |          |      |          |      |    |      |
|-----------------------|------------------------------------------------------------------------------------------|----------|----------|----------|----------|----------|----------|----------|------|----------|------|----|------|
|                       | s;f__Haliangiaceae;g__Haliangium;                                                        |          |          |          |          |          |          |          |      |          |      |    |      |
| Polyangiaceae         | p__Proteobacteria;c__Deltaproteobacteria;o__Myxococcales;f__Polyangiaceae;               | 4.11E-05 | 3.08E-05 | 4.11E-05 | 8.31E-01 | 8.32E-01 | 1        | 1        | 1.00 | 1        | 0.75 | 1  | 1.33 |
| Sorangium             | p__Proteobacteria;c__Deltaproteobacteria;o__Myxococcales;f__Polyangiaceae;g__Sorangium;  | 6.16E-05 | 3.08E-05 | 4.11E-05 | 7.80E-01 | 9.78E-01 | 1        | 1        | 1.50 | 1        | 0.75 | 1  | 2.00 |
| Sandaracinaceae       | p__Proteobacteria;c__Deltaproteobacteria;o__Myxococcales;f__Sandaracinaceae;             | 4.11E-05 | 2.05E-05 | 4.11E-05 | 5.81E-01 | 7.89E-01 | 0        | 1        | 1.00 | NA       | 0.50 | NA | 2.00 |
| Oligoflexales         | p__Proteobacteria;c__Deltaproteobacteria;o__Oligoflexales;                               | 6.16E-05 | 0.000308 | 4.11E-05 | 3.17E-01 | 7.29E-01 | 0        | 9.50E-01 | 1.50 | NA       | 7.50 | NA | 0.20 |
| Syntrophobacterales   | p__Proteobacteria;c__Deltaproteobacteria;o__Syntrophobacterales;                         | 4.11E-05 | 4.11E-05 | 4.11E-05 | 8.08E-01 | 7.18E-01 | 0        | 1        | 1.00 | NA       | 1.00 | NA | 1.00 |
| Syntrophobacteraceae  | p__Proteobacteria;c__Deltaproteobacteria;o__Syntrophobacterales;f__Syntrophobacteraceae; | 4.11E-05 | 0        | 4.11E-05 | 7.62E-01 | 8.28E-01 | 0        | 1        | 1.00 | NA       | NA   | NA | NA   |
| Epsilonproteobacteria | p__Proteobacteria;c__Epsilonproteobacteria;                                              | 0.005731 | 0.006141 | 0.003297 | 8.41E-04 | 8.03E-04 | 2.56E-03 | 2.52E-02 | 1.74 | 1.73E-01 | 1.86 | 1  | 0.93 |

|                     |                                                                                                                     |          |          |          |          |          |          |          |      |          |      |          |      |
|---------------------|---------------------------------------------------------------------------------------------------------------------|----------|----------|----------|----------|----------|----------|----------|------|----------|------|----------|------|
| Campylobacteres     | p__Proteobacteria;c__Epsilon<br>proteobacteria;o__Campylobacterales;                                                | 0.005731 | 0.006141 | 0.003297 | 8.89E-04 | 9.46E-04 | 3.17E-03 | 2.53E-02 | 1.74 | 1.17E-01 | 1.86 | 1        | 0.93 |
| Campylobacteraceae  | p__Proteobacteria;c__Epsilon<br>proteobacteria;o__Campylobacterales;<br>f__Campylobacteraceae;                      | 0.005731 | 0.006141 | 0.003245 | 8.32E-04 | 9.85E-04 | 1.49E-02 | 1.40E-02 | 1.77 | 2.11E-01 | 1.89 | 1        | 0.93 |
| Campylobacter       | p__Proteobacteria;c__Epsilon<br>proteobacteria;o__Campylobacterales;<br>f__Campylobacteraceae;<br>g__Campylobacter; | 0.005731 | 0.006141 | 0.003245 | 8.46E-04 | 1.01E-03 | 8.90E-03 | 3.61E-02 | 1.77 | 2.01E-01 | 1.89 | 1        | 0.93 |
| Helicobacteraceae   | p__Proteobacteria;c__Epsilon<br>proteobacteria;o__Campylobacterales;<br>f__Helicobacteraceae;                       | 4.11E-05 | 3.08E-05 | 5.14E-05 | 3.27E-01 | 6.98E-01 | 1        | 1        | 0.80 | 9.72E-01 | 0.60 | 1        | 1.33 |
| Helicobacter        | p__Proteobacteria;c__Epsilon<br>proteobacteria;o__Campylobacterales;<br>f__Helicobacteraceae;<br>g__Helicobacter;   | 4.11E-05 | 2.05E-05 | 6.16E-05 | 1.17E-01 | 2.25E-01 | 0        | 9.61E-01 | 0.67 | NA       | 0.33 | NA       | 2.00 |
| Wolinella           | p__Proteobacteria;c__Epsilon<br>proteobacteria;o__Campylobacterales;<br>f__Helicobacteraceae;<br>g__Wolinella;      | 4.11E-05 | 4.11E-05 | 4.11E-05 | 3.62E-01 | 2.55E-01 | 1        | 1        | 1.00 | 1        | 1.00 | 1        | 1.00 |
| Gammaproteobacteria | p__Proteobacteria;c__Gamma<br>proteobacteria;                                                                       | 0.133118 | 0.157396 | 0.254971 | 4.78E-06 | 1.19E-06 | 8.40E-04 | 8.09E-02 | 0.52 | 1.85E-01 | 0.62 | 8.89E-01 | 0.85 |

|                             |                                                                                                                              |          |          |          |          |          |          |          |       |          |      |          |      |
|-----------------------------|------------------------------------------------------------------------------------------------------------------------------|----------|----------|----------|----------|----------|----------|----------|-------|----------|------|----------|------|
| Aeromonadales               | p__Proteobacteria;c__Gamma<br>proteobacteria;o__Aeromonadales;                                                               | 0.000103 | 0.000113 | 6.16E-05 | 4.70E-03 | 7.83E-03 | 5.12E-01 | 2.11E-01 | 1.67  | 6.75E-02 | 1.83 | 1        | 0.91 |
| Aeromonadaceae              | p__Proteobacteria;c__Gamma<br>proteobacteria;o__Aeromonadales;<br>f__Aeromonadaceae;                                         | 6.16E-05 | 0.000113 | 4.11E-05 | 2.96E-03 | 4.01E-01 | 2.15E-01 | 7.46E-01 | 1.50  | 1.67E-01 | 2.75 | 5.37E-01 | 0.55 |
| Aeromonas                   | p__Proteobacteria;c__Gamma<br>proteobacteria;o__Aeromonadales;<br>f__Aeromonadaceae;<br>g__Aeromonas;                        | 6.16E-05 | 0.000113 | 4.11E-05 | 4.24E-03 | 4.66E-01 | 1.79E-01 | 9.80E-01 | 1.50  | 6.48E-01 | 2.75 | 6.12E-01 | 0.55 |
| Succinivibrionaceae         | p__Proteobacteria;c__Gamma<br>proteobacteria;o__Aeromonadales;<br>f__Succinivibrionaceae;                                    | 6.16E-05 | 0        | 3.08E-05 | 1.74E-02 | 3.08E-02 | 0        | 1        | 2.00  | NA       | NA   | NA       | NA   |
| Succinivibrionaceae UCG-002 | p__Proteobacteria;c__Gamma<br>proteobacteria;o__Aeromonadales;<br>f__Succinivibrionaceae;<br>g__Succinivibrionaceae_UCG-002; | 0.000472 | 0        | 2.05E-05 | 2.57E-04 | 6.10E-04 | 0        | 3.95E-01 | 23.04 | NA       | NA   | NA       | NA   |
| Alteromonadales             | p__Proteobacteria;c__Gamma<br>proteobacteria;o__Alteromonadales;                                                             | 0.001068 | 0.000195 | 0.000616 | 1.73E-05 | 8.85E-02 | 3.64E-09 | 2.11E-01 | 1.73  | 1.17E-01 | 0.32 | 7.53E-04 | 5.47 |
| Shewanellaceae              | p__Proteobacteria;c__Gamma<br>proteobacteria;o__Alteromonadales;<br>f__Shewanellaceae;                                       | 0.001048 | 0.000195 | 0.000616 | 8.74E-06 | 6.18E-02 | 4.52E-09 | 6.45E-02 | 1.70  | 2.69E-01 | 0.32 | 5.68E-04 | 5.37 |
| Shewanella                  | p__Proteobacteria;c__Gamma<br>proteobacteria;o__Alteromonadales;                                                             | 0.001048 | 0.000195 | 0.000616 | 9.09E-06 | 4.90E-02 | 1.68E-08 | 7.28E-02 | 1.70  | 3.07E-01 | 0.32 | 5.48E-04 | 5.37 |

|                    |                                                                                                                 |          |          |          |          |          |          |          |      |          |      |          |      |
|--------------------|-----------------------------------------------------------------------------------------------------------------|----------|----------|----------|----------|----------|----------|----------|------|----------|------|----------|------|
|                    | adales;f__Shewanellaceae;g__Shewanella;                                                                         |          |          |          |          |          |          |          |      |          |      |          |      |
| Cardiobacteriales  | p__Proteobacteria;c__Gamma<br>proteobacteria;o__Cardiobacteriales;                                              | 0.000965 | 0.000719 | 0.001171 | 1.18E-01 | 2.33E-01 | 1        | 1        | 0.82 | 2.62E-01 | 0.61 | 7.91E-01 | 1.34 |
| Cardiobacteriaceae | p__Proteobacteria;c__Gamma<br>proteobacteria;o__Cardiobacteriales;f__Cardiobacteriaceae;                        | 0.000965 | 0.000719 | 0.001171 | 1.09E-01 | 2.35E-01 | 1        | 1        | 0.82 | 4.22E-01 | 0.61 | 7.92E-01 | 1.34 |
| Cardiobacterium    | p__Proteobacteria;c__Gamma<br>proteobacteria;o__Cardiobacteriales;f__Cardiobacteriaceae;<br>g__Cardiobacterium; | 0.000945 | 0.000719 | 0.001171 | 1.02E-01 | 1.87E-01 | 1        | 1        | 0.81 | 4.48E-01 | 0.61 | 9.27E-01 | 1.31 |
| Cellvibrionales    | p__Proteobacteria;c__Gamma<br>proteobacteria;o__Cellvibrionales;                                                | 3.08E-05 | 6.16E-05 | 4.11E-05 | 2.21E-01 | 7.29E-01 | 1        | 9.29E-01 | 0.75 | 6.31E-01 | 1.50 | 7.91E-01 | 0.50 |
| Chromatiales       | p__Proteobacteria;c__Gamma<br>proteobacteria;o__Chromatiales;                                                   | 4.11E-05 | 3.08E-05 | 0.000144 | 3.47E-03 | 2.97E-03 | 7.75E-06 | 1        | 0.29 | 2.00E-01 | 0.21 | 1        | 1.33 |
| Chromatiaceae      | p__Proteobacteria;c__Gamma<br>proteobacteria;o__Chromatiales;f__Chromatiaceae;                                  | 4.11E-05 | 2.05E-05 | 0.000144 | 1.20E-02 | 1.49E-02 | 1.67E-05 | 3.46E-01 | 0.29 | 3.93E-01 | 0.14 | 1        | 2.00 |
| Rheinheimera       | p__Proteobacteria;c__Gamma<br>proteobacteria;o__Chromatiales;f__Chromatiaceae;g__Rheinheimera;                  | 4.11E-05 | 2.05E-05 | 0.000144 | 2.46E-02 | 2.93E-02 | 1.92E-05 | 9.20E-02 | 0.29 | 3.62E-01 | 0.14 | 1        | 2.00 |

|                      |                                                                                                                          |          |          |          |          |          |          |          |      |          |      |          |      |
|----------------------|--------------------------------------------------------------------------------------------------------------------------|----------|----------|----------|----------|----------|----------|----------|------|----------|------|----------|------|
| Enterobacteriales    | p__Proteobacteria;c__Gamma<br>proteobacteria;o__Enterobact<br>eriales;                                                   | 0.007702 | 0.005648 | 0.018609 | 3.41E-05 | 1.52E-03 | 2.47E-03 | 4.72E-03 | 0.41 | 7.16E-02 | 0.30 | 4.90E-01 | 1.36 |
| Enterobacteriaceae   | p__Proteobacteria;c__Gamma<br>proteobacteria;o__Enterobact<br>eriales;f__Enterobacteriaceae;                             | 0.007702 | 0.005648 | 0.018609 | 3.31E-05 | 1.57E-03 | 1.36E-03 | 1.27E-02 | 0.41 | 2.79E-02 | 0.30 | 4.18E-01 | 1.36 |
| Arsenophonus         | p__Proteobacteria;c__Gamma<br>proteobacteria;o__Enterobact<br>eriales;f__Enterobacteriaceae;<br>g__Arsenophonus;         | 6.16E-05 | 0        | 4.11E-05 | 2.99E-01 | 3.49E-01 | 0        | 1        | 1.50 | NA       | NA   | NA       | NA   |
| Buchnera             | p__Proteobacteria;c__Gamma<br>proteobacteria;o__Enterobact<br>eriales;f__Enterobacteriaceae;<br>g__Buchnera;             | 7.19E-05 | 2.05E-05 | 4.11E-05 | 2.89E-02 | 6.75E-02 | 2.00E-06 | 5.57E-02 | 1.75 | 1        | 0.50 | 1        | 3.51 |
| Escherichia-Shigella | p__Proteobacteria;c__Gamma<br>proteobacteria;o__Enterobact<br>eriales;f__Enterobacteriaceae;<br>g__Escherichia-Shigella; | 0.000606 | 0.00037  | 0.000452 | 8.00E-01 | 8.86E-01 | 1        | 1        | 1.34 | 1        | 0.82 | 1        | 1.64 |
| Yersinia             | p__Proteobacteria;c__Gamma<br>proteobacteria;o__Enterobact<br>eriales;f__Enterobacteriaceae;<br>g__Yersinia;             | 0.000267 | 8.22E-05 | 0.001006 | 5.60E-08 | 1.85E-02 | 1.81E-09 | 1.61E-01 | 0.27 | 9.81E-02 | 0.08 | 9.14E-01 | 3.25 |
| Legionellales        | p__Proteobacteria;c__Gamma<br>proteobacteria;o__Legionellal<br>es;                                                       | 4.11E-05 | 4.11E-05 | 4.11E-05 | 9.82E-01 | 9.61E-01 | 1        | 1        | 1.00 | 1        | 1.00 | 8.20E-01 | 1.00 |



|                    |                                                                                                            |          |          |          |          |          |          |          |      |          |       |          |      |
|--------------------|------------------------------------------------------------------------------------------------------------|----------|----------|----------|----------|----------|----------|----------|------|----------|-------|----------|------|
| Coxiellaceae       | p__Proteobacteria;c__Gamma<br>proteobacteria;o__Legionellal<br>es;f__Coxiellaceae;                         | 4.11E-05 | 4.11E-05 | 4.11E-05 | 8.15E-01 | 6.98E-01 | 1        | 1        | 1.00 | 1        | 1.00  | 1        | 1.00 |
| Aquicella          | p__Proteobacteria;c__Gamma<br>proteobacteria;o__Legionellal<br>es;f__Coxiellaceae;g__Aquic<br>ella;        | 4.11E-05 | 4.11E-05 | 3.08E-05 | 9.03E-01 | 7.55E-01 | 1        | 9.54E-01 | 1.33 | 1        | 1.33  | 1        | 1.00 |
| Oceanospirillales  | p__Proteobacteria;c__Gamma<br>proteobacteria;o__Oceanospir<br>illales;                                     | 0.001725 | 0.00039  | 0.001109 | 3.72E-06 | 7.01E-02 | 3.05E-06 | 2.98E-01 | 1.56 | 4.15E-01 | 0.35  | 2.40E-03 | 4.42 |
| Halomonadaceae     | p__Proteobacteria;c__Gamma<br>proteobacteria;o__Oceanospir<br>illales;f__Halomonadaceae;                   | 0.001725 | 0.000421 | 0.001109 | 3.39E-06 | 6.18E-02 | 1.94E-06 | 2.65E-01 | 1.56 | 7.17E-01 | 0.38  | 6.35E-03 | 4.10 |
| Halomonas          | p__Proteobacteria;c__Gamma<br>proteobacteria;o__Oceanospir<br>illales;f__Halomonadaceae;g__<br>_Halomonas; | 0.001725 | 0.000421 | 0.001109 | 3.39E-06 | 5.02E-02 | 4.95E-06 | 2.05E-01 | 1.56 | 5.83E-01 | 0.38  | 4.06E-03 | 4.10 |
| Oceanospirillaceae | p__Proteobacteria;c__Gamma<br>proteobacteria;o__Oceanospir<br>illales;f__Oceanospirillaceae;               | 4.11E-05 | 0.000883 | 3.08E-05 | 1.47E-01 | 3.70E-01 | 0        | 7.23E-01 | 1.33 | NA       | 28.68 | NA       | 0.05 |
| Pasteurellales     | p__Proteobacteria;c__Gamma<br>proteobacteria;o__Pasteurellal<br>es;                                        | 0.040628 | 0.058025 | 0.048936 | 3.03E-01 | 5.17E-01 | 6.98E-01 | 2.11E-01 | 0.83 | 7.14E-01 | 1.19  | 3.18E-01 | 0.70 |
| Pasteurellaceae    | p__Proteobacteria;c__Gamma<br>proteobacteria;o__Pasteurellal<br>es;f__Pasteurellaceae;                     | 0.040628 | 0.058025 | 0.048936 | 2.99E-01 | 5.11E-01 | 1        | 1.91E-01 | 0.83 | 7.76E-01 | 1.19  | 2.19E-01 | 0.70 |

|                 |                                                                                                           |          |          |          |          |          |          |          |      |          |      |          |      |
|-----------------|-----------------------------------------------------------------------------------------------------------|----------|----------|----------|----------|----------|----------|----------|------|----------|------|----------|------|
| Actinobacillus  | p__Proteobacteria;c__Gamma<br>proteobacteria;o__Pasteurellales;<br>f__Pasteurellaceae;g__Actinobacillus;  | 0.000965 | 0.001376 | 0.001931 | 2.39E-02 | 1.17E-02 | 6.39E-01 | 4.59E-02 | 0.50 | 1        | 0.71 | 5.26E-01 | 0.70 |
| Aggregatibacter | p__Proteobacteria;c__Gamma<br>proteobacteria;o__Pasteurellales;<br>f__Pasteurellaceae;g__Aggregatibacter; | 0.001746 | 0.001808 | 0.002834 | 4.10E-03 | 1.48E-03 | 2.50E-02 | 3.28E-02 | 0.62 | 1        | 0.64 | 1        | 0.97 |
| Haemophilus     | p__Proteobacteria;c__Gamma<br>proteobacteria;o__Pasteurellales;<br>f__Pasteurellaceae;g__Haemophilus;     | 0.000205 | 0.000349 | 0.000308 | 1.14E-02 | 1.49E-02 | 1.92E-01 | 3.86E-02 | 0.67 | 1        | 1.13 | 9.58E-01 | 0.59 |
| Pseudomonadales | p__Proteobacteria;c__Gamma<br>proteobacteria;o__Pseudomonadales;                                          | 0.035493 | 0.048063 | 0.103479 | 9.16E-04 | 2.86E-04 | 1.12E-01 | 2.11E-01 | 0.34 | 1.32E-01 | 0.46 | 8.03E-01 | 0.74 |
| Moraxellaceae   | p__Proteobacteria;c__Gamma<br>proteobacteria;o__Pseudomonadales;<br>f__Moraxellaceae;                     | 0.022963 | 0.024422 | 0.043924 | 1.78E-02 | 1.30E-02 | 1        | 4.80E-01 | 0.52 | 7.76E-01 | 0.56 | 1        | 0.94 |
| Acinetobacter   | p__Proteobacteria;c__Gamma<br>proteobacteria;o__Pseudomonadales;<br>f__Moraxellaceae;g__Acinetobacter;    | 0.019533 | 0.021793 | 0.033839 | 1.15E-01 | 5.41E-02 | 1        | 1.55E-01 | 0.58 | 7.54E-01 | 0.64 | 1        | 0.90 |
| Alkanindiges    | p__Proteobacteria;c__Gamma<br>proteobacteria;o__Pseudomonadales;<br>f__Moraxellaceae;g__Alkanindiges;     | 0.000164 | 0.000329 | 4.11E-05 | 6.47E-05 | 4.47E-02 | 3.37E-23 | 2.32E-01 | 4.00 | 2.53E-03 | 8.00 | 3.13E-01 | 0.50 |

|                     |                                                                                                               |          |          |          |          |          |          |          |      |          |      |          |      |
|---------------------|---------------------------------------------------------------------------------------------------------------|----------|----------|----------|----------|----------|----------|----------|------|----------|------|----------|------|
| Moraxella           | p__Proteobacteria;c__Gamma<br>proteobacteria;o__Pseudomon<br>adales;f__Moraxellaceae;g__<br>Moraxella;        | 0.001664 | 0.000822 | 0.00266  | 2.54E-04 | 6.75E-02 | 4.64E-04 | 3.07E-01 | 0.63 | 3.90E-01 | 0.31 | 7.41E-01 | 2.03 |
| Psychrobacter       | p__Proteobacteria;c__Gamma<br>proteobacteria;o__Pseudomon<br>adales;f__Moraxellaceae;g__<br>Psychrobacter;    | 0.000164 | 0.000431 | 0.000134 | 3.88E-02 | 3.67E-01 | 2.39E-06 | 9.65E-01 | 1.23 | 1        | 3.23 | 2.41E-01 | 0.38 |
| Pseudomonadaceae    | p__Proteobacteria;c__Gamma<br>proteobacteria;o__Pseudomon<br>adales;f__Pseudomonadaceae<br>;                  | 0.001869 | 0.015446 | 0.030368 | 3.56E-11 | 5.41E-12 | 2.15E-15 | 7.58E-06 | 0.06 | 6.59E-01 | 0.51 | 6.62E-02 | 0.12 |
| Pseudomonas         | p__Proteobacteria;c__Gamma<br>proteobacteria;o__Pseudomon<br>adales;f__Pseudomonadaceae<br>;g__Pseudomonas;   | 0.001869 | 0.015446 | 0.030368 | 5.88E-11 | 8.94E-12 | 3.09E-15 | 1.91E-05 | 0.06 | 5.69E-01 | 0.51 | 6.75E-02 | 0.12 |
| Thiotrichales       | p__Proteobacteria;c__Gamma<br>proteobacteria;o__Thiotrichal<br>es;                                            | 4.11E-05 | 0        | 6.16E-05 | 2.03E-01 | 2.66E-01 | 0        | 4.94E-01 | 0.67 | NA       | NA   | NA       | NA   |
| Piscirickettsiaceae | p__Proteobacteria;c__Gamma<br>proteobacteria;o__Thiotrichal<br>es;f__Piscirickettsiaceae;                     | 4.11E-05 | 0        | 6.16E-05 | 1.81E-01 | 2.49E-01 | 0        | 5.71E-01 | 0.67 | NA       | NA   | NA       | NA   |
| Methylophaga        | p__Proteobacteria;c__Gamma<br>proteobacteria;o__Thiotrichal<br>es;f__Piscirickettsiaceae;g__<br>Methylophaga; | 4.11E-05 | 0        | 6.16E-05 | 1.59E-01 | 1.96E-01 | 0        | 3.99E-01 | 0.67 | NA       | NA   | NA       | NA   |

|                                 |                                                                                                  |          |          |          |          |          |          |          |      |          |      |          |      |
|---------------------------------|--------------------------------------------------------------------------------------------------|----------|----------|----------|----------|----------|----------|----------|------|----------|------|----------|------|
| Vibrionales                     | p__Proteobacteria;c__Gamma<br>proteobacteria;o__Vibrionales<br>;                                 | 6.16E-05 | 2.05E-05 | 4.11E-05 | 4.15E-02 | 2.67E-01 | 2.28E-04 | 5.14E-01 | 1.50 | NA       | 0.50 | NA       | 3.00 |
| Vibrionaceae                    | p__Proteobacteria;c__Gamma<br>proteobacteria;o__Vibrionales<br>;f__Vibrionaceae;                 | 6.16E-05 | 2.05E-05 | 4.11E-05 | 4.35E-02 | 2.83E-01 | 4.61E-06 | 4.96E-01 | 1.50 | NA       | 0.50 | NA       | 3.00 |
| Vibrio                          | p__Proteobacteria;c__Gamma<br>proteobacteria;o__Vibrionales<br>;f__Vibrionaceae;g__Vibrio;       | 6.16E-05 | 2.05E-05 | 4.11E-05 | 1.14E-01 | 3.22E-01 | 0        | 3.87E-01 | 1.50 | NA       | 0.50 | NA       | 3.00 |
| Xanthomonadales                 | p__Proteobacteria;c__Gamma<br>proteobacteria;o__Xanthomonadales;                                 | 0.003533 | 0.002342 | 0.005125 | 1.70E-04 | 1.16E-01 | 1.71E-01 | 3.17E-01 | 0.69 | 1.17E-01 | 0.46 | 8.71E-01 | 1.51 |
| Nevskiaceae                     | p__Proteobacteria;c__Gamma<br>proteobacteria;o__Xanthomonadales;f__Nevskiaceae;                  | 4.11E-05 | 2.05E-05 | 4.11E-05 | 5.82E-02 | 3.33E-01 | 1        | 1        | 1.00 | 9.43E-01 | 0.50 | 3.17E-01 | 2.00 |
| Nevskia                         | p__Proteobacteria;c__Gamma<br>proteobacteria;o__Xanthomonadales;f__Nevskiaceae;g__Nevskia;       | 4.11E-05 | 2.05E-05 | 3.08E-05 | 1.82E-01 | 2.49E-01 | 0        | 1        | 1.33 | NA       | 0.67 | NA       | 2.00 |
| unidentified<br>Xanthomonadales | p__Proteobacteria;c__Gamma<br>proteobacteria;o__Xanthomonadales;f__unidentified_Xanthomonadales; | 6.16E-05 | 4.11E-05 | 5.14E-05 | 1.11E-01 | 4.78E-01 | 1        | 7.46E-01 | 1.20 | 1        | 0.80 | 7.92E-01 | 1.50 |
| Acidibacter                     | p__Proteobacteria;c__Gamma<br>proteobacteria;o__Xanthomonadales;                                 | 6.16E-05 | 4.11E-05 | 4.11E-05 | 2.55E-01 | 4.44E-01 | 1        | 5.60E-01 | 1.50 | 1        | 1.00 | 1        | 1.50 |

|                   |                                                                                                                 |          |          |          |          |          |          |          |      |          |      |          |      |
|-------------------|-----------------------------------------------------------------------------------------------------------------|----------|----------|----------|----------|----------|----------|----------|------|----------|------|----------|------|
|                   | nadales;f__unidentified_Xanthomonadales;g__Acidibacter;                                                         |          |          |          |          |          |          |          |      |          |      |          |      |
| Steroidobacter    | p__Proteobacteria;c__Gamma proteobacteria;o__Xanthomonadales;f__unidentified_Xanthomonadales;g__Steroidobacter; | 4.11E-05 | 4.11E-05 | 4.11E-05 | 8.87E-01 | 9.29E-01 | 0        | 1        | 1.00 | 1        | 1.00 | 9.91E-01 | 1.00 |
| Xanthomonadaceae  | p__Proteobacteria;c__Gamma proteobacteria;o__Xanthomonadales;f__Xanthomonadaceae;                               | 0.003286 | 0.002177 | 0.004909 | 2.37E-04 | 9.25E-02 | 6.37E-02 | 5.64E-01 | 0.67 | 2.69E-01 | 0.44 | 7.92E-01 | 1.51 |
| Arenimonas        | p__Proteobacteria;c__Gamma proteobacteria;o__Xanthomonadales;f__Xanthomonadaceae;g__Arenimonas;                 | 4.11E-05 | 2.05E-05 | 4.11E-05 | 7.80E-01 | 9.87E-01 | 1        | 1        | 1.00 | 1        | 0.50 | 1        | 2.00 |
| Pseudoxanthomonas | p__Proteobacteria;c__Gamma proteobacteria;o__Xanthomonadales;f__Xanthomonadaceae;g__Pseudoxanthomonas;          | 4.11E-05 | 4.11E-05 | 0.000462 | 8.03E-02 | 4.10E-02 | 1.10E-02 | 5.51E-01 | 0.09 | 1        | 0.09 | 1        | 1.00 |
| Rhodanobacter     | p__Proteobacteria;c__Gamma proteobacteria;o__Xanthomonadales;f__Xanthomonadaceae;g__Rhodanobacter;              | 2.05E-05 | 9.24E-05 | 0.000164 | 7.26E-02 | 3.36E-02 | 4.50E-03 | 9.65E-01 | 0.12 | 1        | 0.56 | 1        | 0.22 |
| Silanimonas       | p__Proteobacteria;c__Gamma proteobacteria;o__Xanthomo                                                           | 0.002033 | 0.000986 | 0.000616 | 6.32E-08 | 1.20E-08 | 4.28E-07 | 1.27E-04 | 3.30 | 4.88E-01 | 1.60 | 2.85E-01 | 2.06 |

|                               |                                                                                                                                                     |          |          |          |          |          |          |          |      |          |      |          |      |
|-------------------------------|-----------------------------------------------------------------------------------------------------------------------------------------------------|----------|----------|----------|----------|----------|----------|----------|------|----------|------|----------|------|
|                               | nadales;f__Xanthomonadaceae;g__Silanimonas;                                                                                                         |          |          |          |          |          |          |          |      |          |      |          |      |
| Stenotrophomonas              | p__Proteobacteria;c__Gammaproteobacteria;o__Xanthomonadales;f__Xanthomonadaceae;g__Stenotrophomonas;                                                | 0.000288 | 0.000431 | 0.003615 | 1.35E-07 | 5.15E-07 | 1.40E-07 | 1.87E-02 | 0.08 | 1.67E-01 | 0.12 | 9.84E-01 | 0.67 |
| Saccharibacteria              | p__Saccharibacteria;                                                                                                                                | 0.013823 | 0.011584 | 0.00913  | 4.38E-01 | 2.56E-01 | 1        | 5.30E-01 | 1.51 | 1        | 1.27 | 1        | 1.19 |
| unidentified Saccharibacteria | p__Saccharibacteria;c__unidentified_Saccharibacteria;                                                                                               | 0.012283 | 0.009777 | 0.007836 | 4.73E-01 | 2.74E-01 | 1        | 8.08E-01 | 1.57 | 1        | 1.25 | 1        | 1.26 |
| unidentified Saccharibacteria | p__Saccharibacteria;c__unidentified_Saccharibacteria;o__unidentified_Saccharibacteria;                                                              | 0.012283 | 0.009777 | 0.007836 | 4.23E-01 | 2.66E-01 | 1        | 7.08E-01 | 1.57 | 1        | 1.25 | 1        | 1.26 |
| unidentified Saccharibacteria | p__Saccharibacteria;c__unidentified_Saccharibacteria;o__unidentified_Saccharibacteria;f__unidentified_Saccharibacteria;                             | 0.012283 | 0.009777 | 0.007836 | 4.25E-01 | 2.80E-01 | 1        | 6.86E-01 | 1.57 | 1        | 1.25 | 1        | 1.26 |
| Candidatus Saccharimonas      | p__Saccharibacteria;c__unidentified_Saccharibacteria;o__unidentified_Saccharibacteria;f__unidentified_Saccharibacteria;g__Candidatus_Saccharimonas; | 0.002075 | 0.002033 | 0.002177 | 8.54E-01 | 7.01E-01 | 1        | 1        | 0.95 | 1        | 0.93 | 1        | 1.02 |
| unidentified Saccharibacteria | p__Saccharibacteria;c__unidentified_Saccharibacteria;o__unidentified_Saccharibacteria;f__unidentified_Saccharibacteria;                             | 0.009222 | 0.007107 | 0.005844 | 3.92E-01 | 2.19E-01 | 1        | 5.21E-01 | 1.58 | 1        | 1.22 | 1        | 1.30 |

|                           |                                                                                                     |          |          |          |          |          |          |          |      |          |      |          |      |
|---------------------------|-----------------------------------------------------------------------------------------------------|----------|----------|----------|----------|----------|----------|----------|------|----------|------|----------|------|
|                           | __unidentified_Saccharibacteria;g__unidentified_Saccharibacteria;                                   |          |          |          |          |          |          |          |      |          |      |          |      |
| Spirochaetes              | p__Spirochaetes;                                                                                    | 0.000863 | 0.000144 | 0.000246 | 3.33E-13 | 2.60E-07 | 3.42E-12 | 2.79E-03 | 3.50 | 1        | 0.58 | 2.42E-02 | 6.00 |
| unidentified Spirochaetes | p__Spirochaetes;c__unidentified_Spirochaetes;                                                       | 0.000863 | 0.000144 | 0.000246 | 7.05E-13 | 2.24E-07 | 2.62E-11 | 7.48E-03 | 3.50 | 1        | 0.58 | 4.83E-02 | 6.00 |
| Spirochaetales            | p__Spirochaetes;c__unidentified_Spirochaetes;o__Spirochaetales;                                     | 0.000863 | 0.000144 | 0.000246 | 1.33E-12 | 3.46E-07 | 4.79E-11 | 2.97E-03 | 3.50 | 1        | 0.58 | 3.05E-02 | 6.00 |
| Spirochaetaceae           | p__Spirochaetes;c__unidentified_Spirochaetes;o__Spirochaetales;f__Spirochaetaceae;                  | 0.000873 | 0.000144 | 0.000246 | 4.23E-13 | 2.37E-07 | 8.53E-11 | 4.28E-03 | 3.54 | 1        | 0.58 | 2.02E-02 | 6.07 |
| Sphaerochaeta             | p__Spirochaetes;c__unidentified_Spirochaetes;o__Spirochaetales;f__Spirochaetaceae;g__Sphaerochaeta; | 6.16E-05 | 4.11E-05 | 2.05E-05 | 1.01E-01 | 4.66E-02 | 5.62E-10 | 6.26E-01 | 3.00 | 9.29E-01 | 2.00 | 1        | 1.50 |
| Treponema 2               | p__Spirochaetes;c__unidentified_Spirochaetes;o__Spirochaetales;f__Spirochaetaceae;g__Treponema_2;   | 0.000832 | 0.000144 | 0.000226 | 2.01E-12 | 3.18E-07 | 1.49E-10 | 1.07E-03 | 3.68 | 1        | 0.64 | 4.02E-03 | 5.79 |
| Synergistetes             | p__Synergistetes;                                                                                   | 0.000832 | 0.00039  | 0.000442 | 9.87E-05 | 1.41E-03 | 3.73E-01 | 6.55E-02 | 1.88 | 1        | 0.88 | 1.33E-01 | 2.13 |
| Synergistia               | p__Synergistetes;c__Synergistia;                                                                    | 0.000832 | 0.00039  | 0.000442 | 1.22E-04 | 1.64E-03 | 5.52E-01 | 1.95E-01 | 1.88 | 1        | 0.88 | 3.19E-01 | 2.13 |
| Synergistales             | p__Synergistetes;c__Synergistia;o__Synergistales;                                                   | 0.000832 | 0.00039  | 0.000442 | 1.46E-04 | 1.89E-03 | 7.87E-01 | 2.11E-01 | 1.88 | 1        | 0.88 | 3.18E-01 | 2.13 |

|                    |                                                                                          |          |          |          |          |          |          |          |      |          |      |          |      |
|--------------------|------------------------------------------------------------------------------------------|----------|----------|----------|----------|----------|----------|----------|------|----------|------|----------|------|
| Synergistaceae     | p__Synergistetes;c__Synergistia;o__Synergistales;f__Synergistaceae;                      | 0.000832 | 0.00039  | 0.000442 | 1.33E-04 | 1.99E-03 | 1        | 1.22E-01 | 1.88 | 1        | 0.88 | 2.82E-01 | 2.13 |
| Fretibacterium     | p__Synergistetes;c__Synergistia;o__Synergistales;f__Synergistaceae;g__Fretibacterium;    | 0.000832 | 0.00039  | 0.000442 | 1.61E-04 | 2.06E-03 | 1        | 1.55E-01 | 1.88 | 1        | 0.88 | 3.41E-01 | 2.13 |
| Tenericutes        | p__Tenericutes;                                                                          | 0.001849 | 0.00039  | 0.001232 | 1.34E-06 | 3.87E-02 | 7.02E-07 | 7.34E-02 | 1.50 | 3.09E-01 | 0.32 | 2.85E-03 | 4.74 |
| Mollicutes         | p__Tenericutes;c__Mollicutes;                                                            | 0.001849 | 0.00039  | 0.001232 | 9.60E-07 | 4.11E-02 | 1.96E-05 | 1.10E-01 | 1.50 | 4.94E-01 | 0.32 | 2.22E-04 | 4.74 |
| Acholeplasmatales  | p__Tenericutes;c__Mollicutes;o__Acholeplasmatales;                                       | 6.16E-05 | 4.11E-05 | 6.16E-05 | 8.62E-02 | 7.29E-01 | 1        | 1        | 1.00 | 6.79E-01 | 0.67 | 3.58E-01 | 1.50 |
| Acholeplasmataceae | p__Tenericutes;c__Mollicutes;o__Acholeplasmatales;f__Acholeplasmataceae;                 | 6.16E-05 | 4.11E-05 | 6.16E-05 | 8.11E-02 | 7.10E-01 | 1        | 1        | 1.00 | 7.76E-01 | 0.67 | 3.36E-01 | 1.50 |
| Acholeplasma       | p__Tenericutes;c__Mollicutes;o__Acholeplasmatales;f__Acholeplasmataceae;g__Acholeplasma; | 6.16E-05 | 4.11E-05 | 6.16E-05 | 7.79E-02 | 6.61E-01 | 1        | 1        | 1.00 | 6.70E-01 | 0.67 | 4.74E-01 | 1.50 |
| Anaeroplasmatales  | p__Tenericutes;c__Mollicutes;o__Anaeroplasmatales;                                       | 6.16E-05 | 0        | 4.11E-05 | 1.82E-01 | 2.34E-01 | 0        | 8.03E-01 | 1.50 | NA       | NA   | NA       | NA   |
| Anaeroplasmataceae | p__Tenericutes;c__Mollicutes;o__Anaeroplasmatales;f__Anaeroplasmataceae;                 | 6.16E-05 | 0        | 4.11E-05 | 1.74E-01 | 2.39E-01 | 0        | 8.67E-01 | 1.50 | NA       | NA   | NA       | NA   |
| Anaeroplasma       | p__Tenericutes;c__Mollicutes;o__Anaeroplasmatales;f__A                                   | 6.16E-05 | 0        | 4.11E-05 | 1.59E-01 | 1.91E-01 | 0        | 6.87E-01 | 1.50 | NA       | NA   | NA       | NA   |



|                                |                                                                                                                           |          |          |          |          |          |          |          |      |          |      |          |      |
|--------------------------------|---------------------------------------------------------------------------------------------------------------------------|----------|----------|----------|----------|----------|----------|----------|------|----------|------|----------|------|
|                                | naeroplasmataceae;g__Anaer<br>oplasma;                                                                                    |          |          |          |          |          |          |          |      |          |      |          |      |
| Mollicutes RF9                 | p__Tenericutes;c__Mollicutes<br>;o__Mollicutes_RF9;                                                                       | 0.001171 | 0.000329 | 0.000739 | 1.63E-04 | 2.66E-01 | 7.95E-03 | 6.10E-01 | 1.58 | 2.26E-01 | 0.44 | 7.53E-04 | 3.56 |
| unidentified<br>Mollicutes RF9 | p__Tenericutes;c__Mollicutes<br>;o__Mollicutes_RF9;f__unide<br>ntified_Mollicutes_RF9;                                    | 0.000205 | 6.16E-05 | 0.000164 | 6.99E-06 | 1.06E-01 | 2.76E-02 | 5.64E-01 | 1.25 | 1.39E-02 | 0.37 | 2.43E-02 | 3.33 |
| unidentified<br>Mollicutes RF9 | p__Tenericutes;c__Mollicutes<br>;o__Mollicutes_RF9;f__unide<br>ntified_Mollicutes_RF9;g__u<br>nidentified_Mollicutes_RF9; | 0.000205 | 6.16E-05 | 0.000164 | 7.06E-06 | 8.60E-02 | 2.53E-02 | 4.98E-01 | 1.25 | 6.95E-03 | 0.37 | 6.30E-02 | 3.33 |
| Mycoplasmatales                | p__Tenericutes;c__Mollicutes<br>;o__Mycoplasmatales;                                                                      | 0.000226 | 4.11E-05 | 9.24E-05 | 1.05E-09 | 9.48E-05 | 1.45E-06 | 2.67E-03 | 2.44 | 8.87E-01 | 0.44 | 7.53E-04 | 5.50 |
| Mycoplasmataceae               | p__Tenericutes;c__Mollicutes<br>;o__Mycoplasmatales;f__My<br>coplasmataceae;                                              | 0.000226 | 4.11E-05 | 9.24E-05 | 8.58E-10 | 1.10E-04 | 5.48E-07 | 6.52E-04 | 2.44 | 9.70E-01 | 0.44 | 5.17E-04 | 5.50 |
| Mycoplasma                     | p__Tenericutes;c__Mollicutes<br>;o__Mycoplasmatales;f__My<br>coplasmataceae;g__Mycoplas<br>ma;                            | 0.000226 | 4.11E-05 | 9.24E-05 | 2.31E-09 | 8.58E-05 | 3.60E-07 | 2.06E-03 | 2.44 | 9.02E-01 | 0.44 | 1.47E-03 | 5.50 |
| NB1-n                          | p__Tenericutes;c__Mollicutes<br>;o__NB1-n;                                                                                | 6.16E-05 | 4.11E-05 | 4.11E-05 | 3.28E-02 | 1.14E-01 | 1.20E-02 | 2.11E-01 | 1.50 | 8.87E-01 | 1.00 | 9.58E-01 | 1.50 |
| Thermomicrobia                 | p__Thermomicrobia;                                                                                                        | 0.000103 | 2.05E-05 | 2.05E-05 | 1.25E-01 | 9.54E-02 | 0        | 8.83E-01 | 5.01 | NA       | 1.00 | NA       | 5.01 |

|                                  |                                                                                                           |          |          |          |          |          |   |          |      |    |      |          |      |
|----------------------------------|-----------------------------------------------------------------------------------------------------------|----------|----------|----------|----------|----------|---|----------|------|----|------|----------|------|
| unidentified<br>Thermomicrobia   | p__Thermomicrobia;c__unidentified_Thermomicrobia;                                                         | 0.000103 | 2.05E-05 | 2.05E-05 | 1.49E-01 | 1.05E-01 | 0 | 1        | 5.01 | NA | 1.00 | NA       | 5.01 |
| JG30-KF-CM45                     | p__Thermomicrobia;c__unidentified_Thermomicrobia;o__JG30-KF-CM45;                                         | 0.000103 | 2.05E-05 | 2.05E-05 | 1.80E-01 | 1.51E-01 | 0 | 8.71E-01 | 5.01 | NA | 1.00 | NA       | 5.01 |
| Verrucomicrobia                  | p__Verrucomicrobia;                                                                                       | 6.16E-05 | 4.11E-05 | 4.11E-05 | 5.24E-01 | 4.26E-01 | 1 | 8.83E-01 | 1.50 | 1  | 1.00 | 1        | 1.50 |
| OPB35 soil group                 | p__Verrucomicrobia;c__OPB35_soil_group;                                                                   | 5.14E-05 | 8.22E-05 | 4.11E-05 | 7.60E-01 | 6.25E-01 | 1 | 9.96E-01 | 1.25 | 1  | 2.00 | 7.44E-01 | 0.62 |
| unidentified<br>OPB35 soil group | p__Verrucomicrobia;c__OPB35_soil_group;o__unidentified_OPB35_soil_group;                                  | 8.22E-05 | 2.05E-05 | 4.11E-05 | 3.55E-01 | 7.24E-01 | 0 | 7.12E-01 | 2.00 | NA | 0.50 | NA       | 4.01 |
| unidentified<br>OPB35 soil group | p__Verrucomicrobia;c__OPB35_soil_group;o__unidentified_OPB35_soil_group;f__unidentified_OPB35_soil_group; | 8.22E-05 | 2.05E-05 | 4.11E-05 | 3.58E-01 | 6.98E-01 | 0 | 8.06E-01 | 2.00 | NA | 0.50 | NA       | 4.01 |
| Opitutae                         | p__Verrucomicrobia;c__Opitutae;                                                                           | 6.16E-05 | 0.00039  | 4.11E-05 | 3.74E-01 | 5.41E-01 | 0 | 1        | 1.50 | NA | 9.50 | NA       | 0.16 |
| Spartobacteria                   | p__Verrucomicrobia;c__Spartobacteria;                                                                     | 4.11E-05 | 4.11E-05 | 4.11E-05 | 6.00E-01 | 9.43E-01 | 1 | 1        | 1.00 | 1  | 1.00 | 1        | 1.00 |
| Chthoniobacterales               | p__Verrucomicrobia;c__Spartobacteria;o__Chthoniobacterales;                                               | 4.11E-05 | 4.11E-05 | 4.11E-05 | 5.99E-01 | 9.61E-01 | 1 | 1        | 1.00 | 1  | 1.00 | 8.82E-01 | 1.00 |

|                     |                                                                                                      |          |          |          |          |          |   |          |      |   |      |   |      |
|---------------------|------------------------------------------------------------------------------------------------------|----------|----------|----------|----------|----------|---|----------|------|---|------|---|------|
| Chthoniobacteraceae | p__Verrucomicrobia;c__Spartobacteria;o__Chthoniobacterales;f__Chthoniobacteraceae;                   | 5.14E-05 | 2.05E-05 | 2.05E-05 | 5.24E-01 | 5.81E-01 | 0 | 1        | 2.50 | 1 | 1.00 | 1 | 2.50 |
| Chthoniobacter      | p__Verrucomicrobia;c__Spartobacteria;o__Chthoniobacterales;f__Chthoniobacteraceae;g__Chthoniobacter; | 5.14E-05 | 2.05E-05 | 2.05E-05 | 5.01E-01 | 5.15E-01 | 0 | 1        | 2.50 | 1 | 1.00 | 1 | 2.50 |
| DA101 soil group    | p__Verrucomicrobia;c__Spartobacteria;o__Chthoniobacterales;f__DA101_soil_group;                      | 4.11E-05 | 2.05E-05 | 0.000205 | 7.49E-02 | 6.98E-01 | 1 | 4.56E-01 | 0.20 | 1 | 0.10 | 1 | 2.00 |
| Verrucomicrobiae    | p__Verrucomicrobia;c__Verrucomicrobiae;                                                              | 3.08E-05 | 6.17E-05 | 4.11E-05 | 8.29E-01 | 8.83E-01 | 1 | 9.22E-01 | 0.75 | 1 | 1.50 | 1 | 0.50 |
| Verrucomicrobiales  | p__Verrucomicrobia;c__Verrucomicrobiae;o__Verrucomicrobiales;                                        | 3.08E-05 | 6.17E-05 | 4.11E-05 | 8.56E-01 | 8.92E-01 | 1 | 1        | 0.75 | 1 | 1.50 | 1 | 0.50 |
| Verrucomicrobiaceae | p__Verrucomicrobia;c__Verrucomicrobiae;o__Verrucomicrobiales;f__Verrucomicrobiaceae;                 | 3.08E-05 | 6.17E-05 | 4.11E-05 | 8.52E-01 | 9.18E-01 | 1 | 1        | 0.75 | 1 | 1.50 | 1 | 0.50 |

<sup>1</sup>False discovery rate adjusted  $q$ -values were calculated based on  $p$ -values estimated by Kruskal-Wallis tests.

<sup>2</sup>False discovery rate adjusted  $q$ -values were calculated based on  $p$ -values estimated by Jonckheere-Terpstra tests.

<sup>3</sup>Holm adjusted  $q$ -values were calculated based on  $p$ -values estimated by ANCOM-BC, adjusting for age, sex and the education level.

<sup>4</sup>False discovery rate adjusted  $q$ -values were calculated based on  $p$ -values estimated by quantile regression, adjusting for age, sex and the education level.

**Supplementary Table 2. The correlation network of salivary microbiota with symptoms of two disease statuses.**

| Symptoms             | Taxa                                   | Phylum           | r      | p-value | Comparison |
|----------------------|----------------------------------------|------------------|--------|---------|------------|
| Affective flattening | f  Peptococcaceae                      | Firmicutes       | -0.305 | 0.021   | FES vs HC  |
| Affective flattening | g  Peptococcus                         | Firmicutes       | -0.265 | 0.046   | FES vs HC  |
| Affective flattening | f  Bradyrhizobiaceae                   | Proteobacteria   | -0.302 | 0.044   | FES vs HC  |
| Affective flattening | f  Comamonadaceae                      | Proteobacteria   | -0.283 | 0.031   | FES vs HC  |
| Alogia               | f  Peptococcaceae                      | Firmicutes       | -0.370 | 0.005   | FES vs HC  |
| Alogia               | g  Peptococcus                         | Firmicutes       | -0.335 | 0.011   | FES vs HC  |
| Anhedonia            | f  Micrococcaceae                      | Actinobacteria   | -0.270 | 0.040   | FES vs HC  |
| Anhedonia            | g  Rothia                              | Actinobacteria   | -0.272 | 0.039   | FES vs HC  |
| Anhedonia            | f  Sphingobacteriaceae                 | Bacteroidetes    | 0.327  | 0.028   | FES vs HC  |
| Anhedonia            | g  Brevibacillus                       | Firmicutes       | -0.284 | 0.039   | FES vs HC  |
| Anhedonia            | g  Eubacterium coprostanoligenes group | Firmicutes       | -0.379 | 0.047   | FES vs HC  |
| Anhedonia            | g  Paenibacillus                       | Firmicutes       | -0.264 | 0.045   | FES vs HC  |
| Anhedonia            | f  Leptotrichiaceae                    | Fusobacteria     | -0.289 | 0.028   | FES vs HC  |
| Anhedonia            | f  Leptotrichia                        | Fusobacteria     | -0.273 | 0.038   | FES vs HC  |
| Anhedonia            | f  Rhodospirillaceae                   | Proteobacteria   | 0.359  | 0.040   | FES vs HC  |
| Attention            | c  Thermoleophilia                     | Actinobacteria   | 0.335  | 0.018   | FES vs HC  |
| Attention            | g  Lactococcus                         | Firmicutes       | 0.400  | 0.026   | FES vs HC  |
| Attention            | f  Rhodospirillaceae                   | Proteobacteria   | 0.555  | 0.001   | FES vs HC  |
| Attention            | g  Moraxella                           | Proteobacteria   | -0.347 | 0.008   | FES vs HC  |
| Attention            | g  Rhizobium                           | Proteobacteria   | 0.362  | 0.050   | FES vs HC  |
| Attention            | g  Stenotrophomonas                    | Proteobacteria   | -0.279 | 0.036   | FES vs HC  |
| Attention            | o  Rhodospirillales                    | Proteobacteria   | 0.387  | 0.005   | FES vs HC  |
| Avolition            | c  Thermoleophilia                     | Actinobacteria   | 0.304  | 0.032   | FES vs HC  |
| Avolition            | o  Gaiellales                          | Actinobacteria   | 0.327  | 0.048   | FES vs HC  |
| Avolition            | f  Clostridiaceae 1                    | Firmicutes       | 0.352  | 0.044   | FES vs HC  |
| Avolition            | g  Lactococcus                         | Firmicutes       | 0.376  | 0.037   | FES vs HC  |
| Avolition            | g  unidentified Veillonellaceae        | Firmicutes       | 0.431  | 0.004   | FES vs HC  |
| Avolition            | f  Leptotrichiaceae                    | Fusobacteria     | -0.297 | 0.024   | FES vs HC  |
| Avolition            | g  Leptotrichia                        | Fusobacteria     | -0.285 | 0.030   | FES vs HC  |
| Avolition            | f  Gemmatimonadaceae                   | Gemmatimonadetes | 0.335  | 0.040   | FES vs HC  |
| Avolition            | o  Gemmatimonadales                    | Gemmatimonadetes | 0.335  | 0.040   | FES vs HC  |
| Avolition            | f  Rhodospirillaceae                   | Proteobacteria   | 0.470  | 0.006   | FES vs HC  |
| BPRS                 | c  Flavobacteriia                      | Bacteroidetes    | -0.269 | 0.041   | FES vs HC  |
| BPRS                 | f  Flavobacteriaceae                   | Bacteroidetes    | -0.270 | 0.040   | FES vs HC  |
| BPRS                 | g  Chryseobacterium                    | Bacteroidetes    | -0.291 | 0.035   | FES vs HC  |
| BPRS                 | o  Flavobacteriales                    | Bacteroidetes    | -0.269 | 0.041   | FES vs HC  |
| BPRS                 | f  Fusobacteriaceae                    | Fusobacteria     | -0.261 | 0.048   | FES vs HC  |
| BPRS                 | g  Fusobacterium                       | Fusobacteria     | -0.259 | 0.050   | FES vs HC  |
| BPRS                 | c  Epsilonproteobacteria               | Proteobacteria   | -0.269 | 0.041   | FES vs HC  |
| BPRS                 | f  Campylobacteraceae                  | Proteobacteria   | -0.271 | 0.040   | FES vs HC  |
| BPRS                 | g  Actinobacillus                      | Proteobacteria   | -0.280 | 0.033   | FES vs HC  |
| BPRS                 | g  Campylobacter                       | Proteobacteria   | -0.269 | 0.041   | FES vs HC  |
| BPRS                 | g  Haemophilus                         | Proteobacteria   | -0.338 | 0.009   | FES vs HC  |
| BPRS                 | g  Stenotrophomonas                    | Proteobacteria   | -0.272 | 0.040   | FES vs HC  |
| BPRS                 | o  Campylobacterales                   | Proteobacteria   | -0.269 | 0.041   | FES vs HC  |
| BPRS                 | g  Candidatus Saccharimonas            | Saccharibacteria | -0.338 | 0.009   | FES vs HC  |
| SANS                 | f  Peptococcaceae                      | Firmicutes       | -0.277 | 0.037   | FES vs HC  |
| SANS                 | f  Rhodospirillaceae                   | Proteobacteria   | 0.430  | 0.012   | FES vs HC  |
| SANS                 | o  Aeromonadales                       | Proteobacteria   | 0.355  | 0.039   | FES vs HC  |
| CGI                  | c  unidentified Acidobacteria          | Acidobacteria    | 0.250  | 0.029   | FES vs HC  |
| CGI                  | p  Acidobacteria                       | Acidobacteria    | 0.233  | 0.043   | FES vs HC  |
| CGI                  | g  Micrococcus                         | Actinobacteria   | 0.281  | 0.042   | FES vs HC  |
| CGI                  | g  Alloprevotella                      | Bacteroidetes    | -0.261 | 0.022   | FES vs HC  |
| CGI                  | c  Chloroplast                         | Cyanobacteria    | 0.252  | 0.048   | FES vs HC  |
| CGI                  | p  Cyanobacteria                       | Cyanobacteria    | 0.289  | 0.021   | FES vs HC  |
| CGI                  | f  Clostridiaceae 1                    | Firmicutes       | 0.330  | 0.033   | FES vs HC  |
| CGI                  | g  Clostridium sensu stricto 1         | Firmicutes       | 0.362  | 0.025   | FES vs HC  |
| CGI                  | c  Deltaproteobacteria                 | Proteobacteria   | 0.245  | 0.035   | FES vs HC  |
| CGI                  | f  Hyphomicrobiaceae                   | Proteobacteria   | 0.279  | 0.038   | FES vs HC  |
| CGI                  | f  Moraxellaceae                       | Proteobacteria   | -0.228 | 0.046   | FES vs HC  |
| CGI                  | f  Pasteurellaceae                     | Proteobacteria   | -0.267 | 0.019   | FES vs HC  |
| CGI                  | g  Kingella                            | Proteobacteria   | -0.275 | 0.018   | FES vs HC  |
| CGI                  | g  Paracoccus                          | Proteobacteria   | 0.288  | 0.043   | FES vs HC  |
| CGI                  | g  Sphingomonas                        | Proteobacteria   | 0.246  | 0.032   | FES vs HC  |

|      |                                        |                        |        |       |           |
|------|----------------------------------------|------------------------|--------|-------|-----------|
| CGI  | o  Pasteurellales                      | Proteobacteria         | -0.267 | 0.019 | FES vs HC |
| DS   | g  Corynebacterium                     | Actinobacteria         | -0.314 | 0.049 | CHR vs HC |
| DS   | c  unidentified Candidate division SR1 | Candidate division SR1 | 0.412  | 0.008 | CHR vs HC |
| DS   | f  unidentified Candidate division SR1 | Candidate division SR1 | 0.412  | 0.008 | CHR vs HC |
| DS   | g  unidentified Candidate division SR1 | Candidate division SR1 | 0.412  | 0.008 | CHR vs HC |
| DS   | o  unidentified Candidate division SR1 | Candidate division SR1 | 0.412  | 0.008 | CHR vs HC |
| DS   | p  Candidate division SR1              | Candidate division SR1 | 0.412  | 0.008 | CHR vs HC |
| DS   | g  Johnsonella                         | Firmicutes             | 0.320  | 0.044 | CHR vs HC |
| DS   | g  Solobacterium                       | Firmicutes             | 0.321  | 0.043 | CHR vs HC |
| DS   | g  unidentified Lachnospiraceae        | Firmicutes             | -0.538 | 0.001 | CHR vs HC |
| DS   | f  Bradyrhizobiaceae                   | Proteobacteria         | 0.394  | 0.035 | CHR vs HC |
| DS   | g  Mycoplasma                          | Tenericutes            | -0.411 | 0.030 | CHR vs HC |
| GS   | c  Sphingobacteriia                    | Bacteroidetes          | 0.399  | 0.018 | CHR vs HC |
| GS   | f  Sphingobacteriaceae                 | Bacteroidetes          | 0.362  | 0.045 | CHR vs HC |
| GS   | g  Sphingobacterium                    | Bacteroidetes          | 0.468  | 0.016 | CHR vs HC |
| GS   | o  Sphingobacteriales                  | Bacteroidetes          | 0.399  | 0.018 | CHR vs HC |
| GS   | f  Family XIII-1                       | Firmicutes             | 0.360  | 0.037 | CHR vs HC |
| GS   | f  Planococcaceae                      | Firmicutes             | 0.486  | 0.014 | CHR vs HC |
| GS   | f  DA111                               | Proteobacteria         | 0.481  | 0.011 | CHR vs HC |
| GS   | g  Mycoplasma                          | Tenericutes            | -0.410 | 0.030 | CHR vs HC |
| NS   | p  Cyanobacteria                       | Cyanobacteria          | 0.455  | 0.033 | CHR vs HC |
| NS   | c  Deinococci                          | Deinococcus-Thermus    | -0.465 | 0.039 | CHR vs HC |
| NS   | p  Deinococcus-Thermus                 | Deinococcus-Thermus    | -0.465 | 0.039 | CHR vs HC |
| NS   | g  Brevibacillus                       | Firmicutes             | 0.364  | 0.034 | CHR vs HC |
| NS   | g  Faecalibacterium                    | Firmicutes             | -0.335 | 0.037 | CHR vs HC |
| NS   | f  Rhodocyclaceae                      | Proteobacteria         | 0.422  | 0.040 | CHR vs HC |
| NS   | o  Rhodocyclales                       | Proteobacteria         | 0.422  | 0.040 | CHR vs HC |
| NS   | c  unidentified Spirochaetes           | Spirochaetes           | 0.327  | 0.045 | CHR vs HC |
| NS   | f  Spirochaetaceae                     | Spirochaetes           | 0.358  | 0.027 | CHR vs HC |
| NS   | g  Treponema 2                         | Spirochaetes           | 0.344  | 0.035 | CHR vs HC |
| NS   | o  Spirochaetales                      | Spirochaetes           | 0.327  | 0.045 | CHR vs HC |
| NS   | p  Spirochaetes                        | Spirochaetes           | 0.327  | 0.045 | CHR vs HC |
| PS   | g  Shuttleworthia                      | Firmicutes             | 0.461  | 0.005 | CHR vs HC |
| PS   | o  Bacillales                          | Firmicutes             | 0.323  | 0.042 | CHR vs HC |
| PS   | p  Firmicutes                          | Firmicutes             | 0.317  | 0.046 | CHR vs HC |
| SIPS | g  Tannerella                          | Bacteroidetes          | 0.329  | 0.041 | CHR vs HC |
| SIPS | g  Brevibacillus                       | Firmicutes             | 0.360  | 0.036 | CHR vs HC |
| SIPS | f  Bradyrhizobiaceae                   | Proteobacteria         | 0.388  | 0.037 | CHR vs HC |
| SIPS | c  unidentified Spirochaetes           | Spirochaetes           | 0.411  | 0.010 | CHR vs HC |
| SIPS | f  Spirochaetaceae                     | Spirochaetes           | 0.445  | 0.005 | CHR vs HC |
| SIPS | g  Treponema 2                         | Spirochaetes           | 0.433  | 0.007 | CHR vs HC |
| SIPS | o  Spirochaetales                      | Spirochaetes           | 0.411  | 0.010 | CHR vs HC |
| SIPS | p  Spirochaetes                        | Spirochaetes           | 0.411  | 0.010 | CHR vs HC |

**Supplementary Table 3. The distinct relationships between salivary taxa and blood markers in the FES and HC groups, respectively.**

| Blood markers | Taxa                             | Phylum         | r      | p-value | Group |
|---------------|----------------------------------|----------------|--------|---------|-------|
| CRP           | f  Carnobacteriaceae             | Firmicutes     | -0.313 | 0.032   | HC    |
| CRP           | g  Granulicatella                | Firmicutes     | -0.312 | 0.033   | HC    |
| CRP           | c  unidentified Actinobacteria   | Actinobacteria | -0.351 | 0.016   | HC    |
| CRP           | o  Micrococcales                 | Actinobacteria | -0.384 | 0.008   | HC    |
| CRP           | f  Micrococcaceae                | Actinobacteria | -0.386 | 0.007   | HC    |
| CRP           | g  Rothia                        | Actinobacteria | -0.381 | 0.008   | HC    |
| IFN $\gamma$  | g  Silanimonas                   | Proteobacteria | 0.297  | 0.043   | HC    |
| IL 1 $\beta$  | c  Clostridia                    | Firmicutes     | 0.339  | 0.020   | HC    |
| IL 1 $\beta$  | o  Clostridiales                 | Firmicutes     | 0.339  | 0.020   | HC    |
| IL 1 $\beta$  | f  Family XIII                   | Firmicutes     | 0.331  | 0.023   | HC    |
| IL 1 $\beta$  | f  Lachnospiraceae               | Firmicutes     | 0.290  | 0.048   | HC    |
| IL 1 $\beta$  | g  Johnsonella                   | Firmicutes     | 0.310  | 0.034   | HC    |
| IL 1 $\beta$  | g  Lachnospiraceae NK4A136 group | Firmicutes     | -0.341 | 0.034   | HC    |
| IL 1 $\beta$  | g  Mogibacterium                 | Firmicutes     | 0.355  | 0.014   | HC    |
| IL 1 $\beta$  | g  Peptoclostridium              | Firmicutes     | 0.333  | 0.022   | HC    |
| IL 1 $\beta$  | g  Stomatobaculum                | Firmicutes     | 0.297  | 0.043   | HC    |
| IL 1 $\beta$  | g  unidentified Family XIII      | Firmicutes     | 0.307  | 0.036   | HC    |
| IL 1 $\beta$  | p  Bacteroidetes                 | Bacteroidetes  | 0.312  | 0.033   | HC    |
| IL 1 $\beta$  | c  Bacteroidia                   | Bacteroidetes  | 0.295  | 0.044   | HC    |
| IL 1 $\beta$  | o  Bacteroidales                 | Bacteroidetes  | 0.295  | 0.044   | HC    |
| IL 1 $\beta$  | f  Porphyromonadaceae            | Bacteroidetes  | 0.298  | 0.042   | HC    |
| IL 1 $\beta$  | g  Porphyromonas                 | Bacteroidetes  | 0.298  | 0.042   | HC    |
| IL 1 $\beta$  | g  Brachybacterium               | Actinobacteria | 0.869  | 0.025   | HC    |
| IL 1 $\beta$  | g  Mobiluncus                    | Actinobacteria | 0.325  | 0.029   | HC    |
| IL 8          | f  Bacillaceae                   | Firmicutes     | 0.293  | 0.045   | HC    |
| IL 8          | g  Anoxybacillus                 | Firmicutes     | 0.311  | 0.033   | HC    |
| IL 8          | g  Geobacillus                   | Firmicutes     | 0.404  | 0.022   | HC    |
| IL 8          | c  Deltaproteobacteria           | Proteobacteria | 0.356  | 0.014   | HC    |
| IL 8          | o  Sphingomonadales              | Proteobacteria | 0.294  | 0.045   | HC    |
| IL 8          | f  Comamonadaceae                | Proteobacteria | -0.299 | 0.041   | HC    |
| IL 8          | g  Silanimonas                   | Proteobacteria | 0.394  | 0.006   | HC    |
| S100B         | p  Chloroflexi                   | Chloroflexi    | -0.533 | 0.007   | HC    |
| S100B         | g  Brachybacterium               | Actinobacteria | 0.852  | 0.031   | HC    |
| Thioredoxin   | g  Prevotellaceae UCG-004        | Bacteroidetes  | 0.599  | 0.039   | HC    |
| Thioredoxin   | g  Acidovorax                    | Proteobacteria | -0.307 | 0.038   | HC    |
| Thioredoxin   | g  Pseudomonas                   | Proteobacteria | -0.373 | 0.010   | HC    |
| TNF $\alpha$  | f  Bacillaceae                   | Firmicutes     | 0.328  | 0.025   | HC    |
| TNF $\alpha$  | g  Anoxybacillus                 | Firmicutes     | 0.361  | 0.013   | HC    |
| TNF $\alpha$  | g  Geobacillus                   | Firmicutes     | 0.366  | 0.039   | HC    |
| TNF $\alpha$  | c  unidentified Spirochaetes     | Spirochaetes   | 0.361  | 0.014   | HC    |
| TNF $\alpha$  | o  Spirochaetales                | Spirochaetes   | 0.361  | 0.014   | HC    |
| TNF $\alpha$  | f  Spirochaetaceae               | Spirochaetes   | 0.361  | 0.014   | HC    |
| TNF $\alpha$  | g  Brachybacterium               | Actinobacteria | 0.860  | 0.028   | HC    |
| TNF $\alpha$  | o  Sphingomonadales              | Proteobacteria | 0.318  | 0.030   | HC    |
| TNF $\alpha$  | f  Sphingomonadaceae             | Proteobacteria | 0.310  | 0.034   | HC    |
| TNF $\alpha$  | g  Silanimonas                   | Proteobacteria | 0.420  | 0.003   | HC    |
| CRP           | p  Firmicutes                    | Firmicutes     | 0.334  | 0.026   | FES   |
| CRP           | f  Carnobacteriaceae             | Firmicutes     | 0.308  | 0.042   | FES   |
| CRP           | g  Granulicatella                | Firmicutes     | 0.308  | 0.042   | FES   |
| CRP           | p  Thermomicrobia                | Thermomicrobia | -0.161 | 0.017   | FES   |
| CRP           | p  Bacteroidetes                 | Bacteroidetes  | -0.326 | 0.031   | FES   |
| CRP           | o  Propionibacteriales           | Actinobacteria | 0.481  | 0.002   | FES   |
| CRP           | f  Propionibacteriaceae          | Actinobacteria | 0.360  | 0.026   | FES   |
| CRP           | g  Haemophilus                   | Proteobacteria | -0.384 | 0.010   | FES   |
| IFN $\gamma$  | g  Megasphaera                   | Firmicutes     | -0.382 | 0.011   | FES   |
| IFN $\gamma$  | g  Veillonella                   | Firmicutes     | -0.352 | 0.019   | FES   |
| IFN $\gamma$  | c  Epsilonproteobacteria         | Proteobacteria | -0.300 | 0.048   | FES   |
| IFN $\gamma$  | o  Campylobacteriales            | Proteobacteria | -0.300 | 0.048   | FES   |
| IFN $\gamma$  | f  Campylobacteraceae            | Proteobacteria | -0.307 | 0.043   | FES   |
| IFN $\gamma$  | g  Campylobacter                 | Proteobacteria | -0.307 | 0.042   | FES   |
| IFN $\gamma$  | g  Haemophilus                   | Proteobacteria | -0.375 | 0.012   | FES   |
| IL 1 $\beta$  | f  Porphyromonadaceae            | Bacteroidetes  | 0.320  | 0.034   | FES   |

|              |   |                             |                  |        |       |     |
|--------------|---|-----------------------------|------------------|--------|-------|-----|
| IL 1 $\beta$ | g | Porphyromonas               | Bacteroidetes    | 0.315  | 0.037 | FES |
| IL 1 $\beta$ | g | Brachybacterium             | Actinobacteria   | 0.651  | 0.030 | FES |
| IL 8         | g | Megasphaera                 | Firmicutes       | -0.459 | 0.002 | FES |
| IL 8         | g | Veillonella                 | Firmicutes       | -0.325 | 0.031 | FES |
| IL 8         | p | Saccharibacteria            | Saccharibacteria | -0.328 | 0.030 | FES |
| IL 8         | p | Bacteroidetes               | Bacteroidetes    | -0.326 | 0.031 | FES |
| IL 8         | g | Haemophilus                 | Proteobacteria   | -0.324 | 0.032 | FES |
| S100B        | f | Spirochaetaceae             | Spirochaetes     | 0.309  | 0.047 | FES |
| S100B        | g | Treponema 2                 | Spirochaetes     | 0.323  | 0.037 | FES |
| S100B        | o | Mycoplasmatales             | Tenericutes      | 0.390  | 0.011 | FES |
| S100B        | f | Mycoplasmataceae            | Tenericutes      | 0.390  | 0.011 | FES |
| S100B        | g | Mycoplasma                  | Tenericutes      | 0.385  | 0.012 | FES |
| S100B        | g | Prevotellaceae UCG-004      | Bacteroidetes    | 0.477  | 0.039 | FES |
| S100B        | g | Lautropia                   | Proteobacteria   | -0.311 | 0.040 | FES |
| Thioredoxin  | o | Bacillales                  | Firmicutes       | -0.319 | 0.035 | FES |
| Thioredoxin  | g | Parvimonas                  | Firmicutes       | -0.342 | 0.023 | FES |
| Thioredoxin  | c | unidentified Acidobacteria  | Acidobacteria    | -0.307 | 0.043 | FES |
| Thioredoxin  | p | Actinobacteria              | Actinobacteria   | -0.376 | 0.012 | FES |
| Thioredoxin  | c | unidentified Actinobacteria | Actinobacteria   | -0.382 | 0.011 | FES |
| Thioredoxin  | o | Micrococcales               | Actinobacteria   | -0.393 | 0.008 | FES |
| Thioredoxin  | f | Micrococcaceae              | Actinobacteria   | -0.381 | 0.011 | FES |
| Thioredoxin  | g | Rothia                      | Actinobacteria   | -0.381 | 0.011 | FES |
| Thioredoxin  | p | Proteobacteria              | Proteobacteria   | 0.317  | 0.036 | FES |
| TNF $\alpha$ | g | Catonella                   | Firmicutes       | -0.308 | 0.042 | FES |
| TNF $\alpha$ | g | Megasphaera                 | Firmicutes       | -0.458 | 0.002 | FES |
| TNF $\alpha$ | g | Selenomonas 4               | Firmicutes       | -0.394 | 0.008 | FES |
| TNF $\alpha$ | g | Veillonella                 | Firmicutes       | -0.379 | 0.011 | FES |
| TNF $\alpha$ | f | Fusobacteriaceae            | Fusobacteria     | -0.331 | 0.028 | FES |
| TNF $\alpha$ | g | Fusobacterium               | Fusobacteria     | -0.330 | 0.029 | FES |
| TNF $\alpha$ | p | Saccharibacteria            | Saccharibacteria | -0.453 | 0.002 | FES |
| TNF $\alpha$ | p | Bacteroidetes               | Bacteroidetes    | -0.404 | 0.007 | FES |
| TNF $\alpha$ | c | Bacteroidia                 | Bacteroidetes    | -0.331 | 0.028 | FES |
| TNF $\alpha$ | o | Bacteroidales               | Bacteroidetes    | -0.331 | 0.028 | FES |
| TNF $\alpha$ | f | Prevotellaceae              | Bacteroidetes    | -0.305 | 0.044 | FES |
| TNF $\alpha$ | o | Campylobacteriales          | Proteobacteria   | -0.383 | 0.010 | FES |
| TNF $\alpha$ | f | Campylobacteraceae          | Proteobacteria   | -0.382 | 0.011 | FES |
| TNF $\alpha$ | g | Aggregatibacter             | Proteobacteria   | -0.319 | 0.035 | FES |
| TNF $\alpha$ | g | Campylobacter               | Proteobacteria   | -0.382 | 0.011 | FES |
| TNF $\alpha$ | g | Haemophilus                 | Proteobacteria   | -0.434 | 0.003 | FES |

**Supplementary Table 4. Differential KEGG pathways between FES and HC, CHR and HC, and FES and CHR, as detected in the DESeq2 package. All pathways with an FDR-adjusted  $q < 0.05$  are included in the table.**

| KEGG pathway at level 3          | KEGG pathway at level 2             | KEGG pathway at level 1              | baseMean | log2FoldChange | lfcSE    | <i>p</i> -value | <i>q</i> -value | Comparison |
|----------------------------------|-------------------------------------|--------------------------------------|----------|----------------|----------|-----------------|-----------------|------------|
| Meiosis - yeast                  | Cell Growth and Death               | Cellular Processes                   | 4245.095 | 0.380204616    | 0.14314  | 0.007903        | 0.015282        | FES vs HC  |
| p53 signaling pathway            | Cell Growth and Death               | Cellular Processes                   | 950.1711 | -0.534363734   | 0.224109 | 0.017107        | 0.029558        | FES vs HC  |
| Bacterial motility proteins      | Cell Motility                       | Cellular Processes                   | 338845.3 | -0.197360198   | 0.083265 | 0.017776        | 0.030532        | FES vs HC  |
| Peroxisome                       | Transport and Catabolism            | Cellular Processes                   | 70909.2  | -0.128271677   | 0.04104  | 0.001775        | 0.004387        | FES vs HC  |
| Bacterial secretion system       | Membrane Transport                  | Environmental Information Processing | 229993.9 | -0.077402017   | 0.028995 | 0.007596        | 0.014887        | FES vs HC  |
| Phosphotransferase system (PTS)  | Membrane Transport                  | Environmental Information Processing | 119366.7 | 0.296597801    | 0.107938 | 0.005999        | 0.012335        | FES vs HC  |
| Secretion system                 | Membrane Transport                  | Environmental Information Processing | 520527.6 | -0.131104298   | 0.036695 | 0.000353        | 0.001164        | FES vs HC  |
| Transporters                     | Membrane Transport                  | Environmental Information Processing | 1566809  | 0.122010263    | 0.037125 | 0.001014        | 0.002768        | FES vs HC  |
| Two-component system             | Signal Transduction                 | Environmental Information Processing | 453914.2 | -0.183719856   | 0.060837 | 0.002529        | 0.005814        | FES vs HC  |
| Bacterial toxins                 | Signaling Molecules and Interaction | Environmental Information Processing | 26689.87 | 0.368023726    | 0.084751 | 1.41E-05        | 9.15E-05        | FES vs HC  |
| Cellular antigens                | Signaling Molecules and Interaction | Environmental Information Processing | 16086.02 | -0.185322844   | 0.053935 | 0.00059         | 0.001777        | FES vs HC  |
| Ion channels                     | Signaling Molecules and Interaction | Environmental Information Processing | 8958.685 | 0.209904383    | 0.093313 | 0.024483        | 0.040164        | FES vs HC  |
| Chaperones and folding catalysts | Folding                             | Genetic Information Processing       | 324011.1 | -0.038355488   | 0.017383 | 0.027348        | 0.04412         | FES vs HC  |
| Proteasome                       | Folding                             | Genetic Information Processing       | 8316.549 | 0.210877358    | 0.068149 | 0.001972        | 0.004721        | FES vs HC  |
| Protein export                   | Folding                             | Genetic Information Processing       | 188349.9 | 0.12165316     | 0.030326 | 6.03E-05        | 0.000284        | FES vs HC  |
| RNA degradation                  | Folding                             | Genetic Information Processing       | 135082.7 | 0.051520545    | 0.017783 | 0.003765        | 0.008265        | FES vs HC  |



|                                           |                         |                                |          |              |          |          |          |           |
|-------------------------------------------|-------------------------|--------------------------------|----------|--------------|----------|----------|----------|-----------|
| Sulfur relay system                       | Folding                 | Genetic Information Processing | 94637.73 | -0.07152801  | 0.031203 | 0.021885 | 0.036183 | FES vs HC |
| Base excision repair                      | Replication and Repair  | Genetic Information Processing | 139652.1 | 0.079931796  | 0.024471 | 0.001089 | 0.002918 | FES vs HC |
| DNA repair and recombination proteins     | Replication and Repair  | Genetic Information Processing | 829138.5 | 0.093264381  | 0.021734 | 1.78E-05 | 0.00011  | FES vs HC |
| DNA replication                           | Replication and Repair  | Genetic Information Processing | 190060.6 | 0.119060079  | 0.02945  | 5.28E-05 | 0.000257 | FES vs HC |
| DNA replication proteins                  | Replication and Repair  | Genetic Information Processing | 333105.5 | 0.10155941   | 0.029314 | 0.000531 | 0.001686 | FES vs HC |
| Homologous recombination                  | Replication and Repair  | Genetic Information Processing | 269222.5 | 0.116244937  | 0.027672 | 2.66E-05 | 0.000152 | FES vs HC |
| Mismatch repair                           | Replication and Repair  | Genetic Information Processing | 219966.8 | 0.114518181  | 0.027851 | 3.93E-05 | 0.00021  | FES vs HC |
| Non-homologous end-joining                | Replication and Repair  | Genetic Information Processing | 7120.519 | -0.709819866 | 0.123078 | 8.06E-09 | 5.88E-07 | FES vs HC |
| Nucleotide excision repair                | Replication and Repair  | Genetic Information Processing | 104055.3 | 0.141872295  | 0.031249 | 5.62E-06 | 5.3E-05  | FES vs HC |
| RNA polymerase                            | Transcription           | Genetic Information Processing | 50097.04 | 0.179560231  | 0.038499 | 3.1E-06  | 3.75E-05 | FES vs HC |
| Transcription factors                     | Transcription           | Genetic Information Processing | 380812.1 | -0.061748562 | 0.025557 | 0.015688 | 0.027267 | FES vs HC |
| Transcription machinery                   | Transcription           | Genetic Information Processing | 203540.2 | 0.044511687  | 0.016306 | 0.006336 | 0.01276  | FES vs HC |
| Aminoacyl-tRNA biosynthesis               | Translation             | Genetic Information Processing | 345808.8 | 0.150975042  | 0.033802 | 7.95E-06 | 6.83E-05 | FES vs HC |
| Ribosome                                  | Translation             | Genetic Information Processing | 672565.7 | 0.157989182  | 0.036292 | 1.34E-05 | 9.15E-05 | FES vs HC |
| Translation factors                       | Translation             | Genetic Information Processing | 151608.5 | 0.128517366  | 0.034729 | 0.000215 | 0.000766 | FES vs HC |
| Colorectal cancer                         | Cancers                 | Human Diseases                 | 911.4571 | -0.587338332 | 0.221645 | 0.008051 | 0.015282 | FES vs HC |
| Small cell lung cancer                    | Cancers                 | Human Diseases                 | 913.3333 | -0.58037368  | 0.221753 | 0.008865 | 0.016281 | FES vs HC |
| Viral myocarditis                         | Cardiovascular Diseases | Human Diseases                 | 912.7365 | -0.586210722 | 0.221747 | 0.008203 | 0.015342 | FES vs HC |
| African trypanosomiasis                   | Infectious Diseases     | Human Diseases                 | 3219.036 | -0.636958658 | 0.155821 | 4.36E-05 | 0.000219 | FES vs HC |
| Chagas disease (American trypanosomiasis) | Infectious Diseases     | Human Diseases                 | 2468.933 | -0.376418564 | 0.148924 | 0.011485 | 0.020575 | FES vs HC |
| Influenza A                               | Infectious Diseases     | Human Diseases                 | 914.1679 | -0.584999308 | 0.221743 | 0.008335 | 0.015404 | FES vs HC |
| Pertussis                                 | Infectious Diseases     | Human Diseases                 | 11182.47 | -0.700140275 | 0.16096  | 1.36E-05 | 9.15E-05 | FES vs HC |
| Shigellosis                               | Infectious Diseases     | Human Diseases                 | 64.18368 | -1.19650815  | 0.331773 | 0.00031  | 0.001042 | FES vs HC |

|                                                |                            |                |          |              |          |          |          |           |
|------------------------------------------------|----------------------------|----------------|----------|--------------|----------|----------|----------|-----------|
| Staphylococcus aureus infection                | Infectious Diseases        | Human Diseases | 12407.88 | 0.618358288  | 0.1626   | 0.000143 | 0.000567 | FES vs HC |
| Toxoplasmosis                                  | Infectious Diseases        | Human Diseases | 911.5348 | -0.587077106 | 0.221655 | 0.008082 | 0.015282 | FES vs HC |
| Tuberculosis                                   | Infectious Diseases        | Human Diseases | 37803.36 | 0.091418069  | 0.030405 | 0.002641 | 0.005979 | FES vs HC |
| Vibrio cholerae infection                      | Infectious Diseases        | Human Diseases | 462.4375 | -0.769946041 | 0.219288 | 0.000446 | 0.001448 | FES vs HC |
| Vibrio cholerae pathogenic cycle               | Infectious Diseases        | Human Diseases | 24209.15 | -0.14918128  | 0.054598 | 0.006288 | 0.012751 | FES vs HC |
| Type I diabetes mellitus                       | Metabolic Diseases         | Human Diseases | 13663.68 | 0.180103695  | 0.03876  | 3.37E-06 | 3.75E-05 | FES vs HC |
| Type II diabetes mellitus                      | Metabolic Diseases         | Human Diseases | 12838.71 | 0.191003342  | 0.072148 | 0.008112 | 0.015282 | FES vs HC |
| Amyotrophic lateral sclerosis<br>(ALS)         | Neurodegenerative Diseases | Human Diseases | 11836.29 | -0.288597308 | 0.085891 | 0.000779 | 0.002276 | FES vs HC |
| Huntington's disease                           | Neurodegenerative Diseases | Human Diseases | 32149.97 | -0.155471209 | 0.0513   | 0.002441 | 0.005656 | FES vs HC |
| Parkinson's disease                            | Neurodegenerative Diseases | Human Diseases | 15753.59 | -0.25794094  | 0.105847 | 0.014813 | 0.026056 | FES vs HC |
| Prion diseases                                 | Neurodegenerative Diseases | Human Diseases | 2894.77  | -0.490315548 | 0.128734 | 0.00014  | 0.000567 | FES vs HC |
| Alanine, aspartate and glutamate<br>metabolism | Amino Acid Metabolism      | Metabolism     | 264457.3 | 0.028744853  | 0.012544 | 0.021933 | 0.036183 | FES vs HC |
| Amino acid related enzymes                     | Amino Acid Metabolism      | Metabolism     | 423903.4 | 0.077189027  | 0.019821 | 9.84E-05 | 0.000436 | FES vs HC |
| Arginine and proline metabolism                | Amino Acid Metabolism      | Metabolism     | 310776.7 | -0.075280939 | 0.024052 | 0.001748 | 0.004387 | FES vs HC |
| Cysteine and methionine<br>metabolism          | Amino Acid Metabolism      | Metabolism     | 260043.6 | 0.05025873   | 0.018979 | 0.008095 | 0.015282 | FES vs HC |
| Histidine metabolism                           | Amino Acid Metabolism      | Metabolism     | 153704.4 | -0.066690663 | 0.027312 | 0.014612 | 0.025859 | FES vs HC |
| Lysine biosynthesis                            | Amino Acid Metabolism      | Metabolism     | 192619.7 | 0.065758484  | 0.020799 | 0.001569 | 0.004053 | FES vs HC |
| Lysine degradation                             | Amino Acid Metabolism      | Metabolism     | 96883.31 | -0.434022218 | 0.096559 | 6.96E-06 | 6.16E-05 | FES vs HC |
| Phenylalanine metabolism                       | Amino Acid Metabolism      | Metabolism     | 67728.5  | -0.262434309 | 0.060082 | 1.25E-05 | 9.15E-05 | FES vs HC |
| Tryptophan metabolism                          | Amino Acid Metabolism      | Metabolism     | 117770.1 | -0.374181603 | 0.086047 | 1.37E-05 | 9.15E-05 | FES vs HC |
| Tyrosine metabolism                            | Amino Acid Metabolism      | Metabolism     | 121881.9 | -0.146342253 | 0.040124 | 0.000265 | 0.0009   | FES vs HC |

|                                                        |                                             |            |          |              |          |          |          |           |
|--------------------------------------------------------|---------------------------------------------|------------|----------|--------------|----------|----------|----------|-----------|
| Valine, leucine and isoleucine biosynthesis            | Amino Acid Metabolism                       | Metabolism | 219792.6 | 0.057866092  | 0.022545 | 0.010266 | 0.018619 | FES vs HC |
| Valine, leucine and isoleucine degradation             | Amino Acid Metabolism                       | Metabolism | 167075   | -0.43529016  | 0.089548 | 1.17E-06 | 2.01E-05 | FES vs HC |
| beta-Lactam resistance                                 | Biosynthesis of Other Secondary Metabolites | Metabolism | 6161.451 | -0.283837707 | 0.099664 | 0.0044   | 0.009447 | FES vs HC |
| Betalain biosynthesis                                  | Biosynthesis of Other Secondary Metabolites | Metabolism | 135.1716 | -1.024684877 | 0.302543 | 0.000707 | 0.002106 | FES vs HC |
| Butirosin and neomycin biosynthesis                    | Biosynthesis of Other Secondary Metabolites | Metabolism | 12052.52 | 0.275181215  | 0.083216 | 0.000944 | 0.002624 | FES vs HC |
| Caffeine metabolism                                    | Biosynthesis of Other Secondary Metabolites | Metabolism | 615.6156 | 0.806526437  | 0.209372 | 0.000117 | 0.000488 | FES vs HC |
| Flavone and flavonol biosynthesis                      | Biosynthesis of Other Secondary Metabolites | Metabolism | 741.4719 | 0.491467561  | 0.175014 | 0.004983 | 0.010467 | FES vs HC |
| Flavonoid biosynthesis                                 | Biosynthesis of Other Secondary Metabolites | Metabolism | 1600.815 | 0.43034265   | 0.150263 | 0.004184 | 0.00905  | FES vs HC |
| Isoflavonoid biosynthesis                              | Biosynthesis of Other Secondary Metabolites | Metabolism | 98.84446 | -1.285273203 | 0.314113 | 4.28E-05 | 0.000219 | FES vs HC |
| Isoquinoline alkaloid biosynthesis                     | Biosynthesis of Other Secondary Metabolites | Metabolism | 16799.79 | -0.112299815 | 0.042146 | 0.00771  | 0.015009 | FES vs HC |
| Stilbenoid, diarylheptanoid and gingerol biosynthesis  | Biosynthesis of Other Secondary Metabolites | Metabolism | 1566.539 | 0.476337084  | 0.169194 | 0.004873 | 0.01031  | FES vs HC |
| Streptomycin biosynthesis                              | Biosynthesis of Other Secondary Metabolites | Metabolism | 81896.03 | 0.145949227  | 0.046931 | 0.001872 | 0.004555 | FES vs HC |
| Tropane, piperidine and pyridine alkaloid biosynthesis | Biosynthesis of Other Secondary Metabolites | Metabolism | 34528.98 | -0.167012521 | 0.043884 | 0.000141 | 0.000567 | FES vs HC |

|                                             |                         |            |          |              |          |          |          |           |
|---------------------------------------------|-------------------------|------------|----------|--------------|----------|----------|----------|-----------|
| Amino sugar and nucleotide sugar metabolism | Carbohydrate Metabolism | Metabolism | 319258.3 | 0.213646683  | 0.046036 | 3.47E-06 | 3.75E-05 | FES vs HC |
| Ascorbate and aldarate metabolism           | Carbohydrate Metabolism | Metabolism | 34376.51 | -0.19565637  | 0.062642 | 0.001788 | 0.004387 | FES vs HC |
| Butanoate metabolism                        | Carbohydrate Metabolism | Metabolism | 246116.3 | -0.141176789 | 0.040971 | 0.000569 | 0.00175  | FES vs HC |
| C5-Branched dibasic acid metabolism         | Carbohydrate Metabolism | Metabolism | 91665.01 | 0.055805453  | 0.023677 | 0.018426 | 0.031464 | FES vs HC |
| Fructose and mannose metabolism             | Carbohydrate Metabolism | Metabolism | 178658.9 | 0.220661145  | 0.050133 | 1.08E-05 | 8.13E-05 | FES vs HC |
| Galactose metabolism                        | Carbohydrate Metabolism | Metabolism | 127874.3 | 0.313719043  | 0.077588 | 5.27E-05 | 0.000257 | FES vs HC |
| Glycolysis / Gluconeogenesis                | Carbohydrate Metabolism | Metabolism | 315172.8 | 0.101802219  | 0.026777 | 0.000144 | 0.000567 | FES vs HC |
| Glyoxylate and dicarboxylate metabolism     | Carbohydrate Metabolism | Metabolism | 169909.4 | -0.20924995  | 0.041409 | 4.34E-07 | 9.49E-06 | FES vs HC |
| Inositol phosphate metabolism               | Carbohydrate Metabolism | Metabolism | 45895.97 | -0.117304023 | 0.038884 | 0.002555 | 0.005829 | FES vs HC |
| Pentose phosphate pathway                   | Carbohydrate Metabolism | Metabolism | 204399.3 | 0.120743196  | 0.032184 | 0.000176 | 0.000658 | FES vs HC |
| Propanoate metabolism                       | Carbohydrate Metabolism | Metabolism | 226362   | -0.187916575 | 0.044825 | 2.76E-05 | 0.000155 | FES vs HC |
| Starch and sucrose metabolism               | Carbohydrate Metabolism | Metabolism | 172871.2 | 0.249523509  | 0.052458 | 1.97E-06 | 3.03E-05 | FES vs HC |
| Carbon fixation in photosynthetic organisms | Energy Metabolism       | Metabolism | 152559.9 | 0.113339191  | 0.030442 | 0.000197 | 0.000727 | FES vs HC |
| Methane metabolism                          | Energy Metabolism       | Metabolism | 292152   | 0.068590174  | 0.020431 | 0.000787 | 0.002276 | FES vs HC |
| Nitrogen metabolism                         | Energy Metabolism       | Metabolism | 205748.6 | -0.06823546  | 0.021509 | 0.001512 | 0.003977 | FES vs HC |
| Photosynthesis                              | Energy Metabolism       | Metabolism | 102515.8 | 0.204166289  | 0.038065 | 8.15E-08 | 3.4E-06  | FES vs HC |
| Photosynthesis proteins                     | Energy Metabolism       | Metabolism | 107024.6 | 0.174494454  | 0.033942 | 2.73E-07 | 8.87E-06 | FES vs HC |
| Sulfur metabolism                           | Energy Metabolism       | Metabolism | 92128.66 | -0.070609803 | 0.024625 | 0.004138 | 0.009017 | FES vs HC |
| Cytochrome P450                             | Enzyme Families         | Metabolism | 27.65174 | 2.289385856  | 0.273396 | 5.57E-17 | 1.63E-14 | FES vs HC |

|                                                      |                                    |            |          |              |          |          |          |           |
|------------------------------------------------------|------------------------------------|------------|----------|--------------|----------|----------|----------|-----------|
| Peptidases                                           | Enzyme Families                    | Metabolism | 466530.6 | 0.100451372  | 0.023591 | 2.06E-05 | 0.000123 | FES vs HC |
| Protein kinases                                      | Enzyme Families                    | Metabolism | 97016.09 | -0.129755314 | 0.04631  | 0.005081 | 0.010597 | FES vs HC |
| Glycosaminoglycan biosynthesis - chondroitin sulfate | Glycan Biosynthesis and Metabolism | Metabolism | 34.40882 | -0.652678621 | 0.208938 | 0.001785 | 0.004387 | FES vs HC |
| Glycosaminoglycan degradation                        | Glycan Biosynthesis and Metabolism | Metabolism | 6814.51  | 0.420306113  | 0.161713 | 0.009347 | 0.017058 | FES vs HC |
| Glycosphingolipid biosynthesis - ganglio series      | Glycan Biosynthesis and Metabolism | Metabolism | 5210.228 | 0.379413789  | 0.164009 | 0.020702 | 0.034742 | FES vs HC |
| Glycosphingolipid biosynthesis - globo series        | Glycan Biosynthesis and Metabolism | Metabolism | 11378.54 | 0.471643227  | 0.153352 | 0.002101 | 0.004988 | FES vs HC |
| Glycosyltransferases                                 | Glycan Biosynthesis and Metabolism | Metabolism | 115625.3 | 0.086465467  | 0.027409 | 0.001607 | 0.004117 | FES vs HC |
| Lipopolysaccharide biosynthesis                      | Glycan Biosynthesis and Metabolism | Metabolism | 125595.7 | -0.160112347 | 0.050591 | 0.001552 | 0.004045 | FES vs HC |
| Lipopolysaccharide biosynthesis proteins             | Glycan Biosynthesis and Metabolism | Metabolism | 165222.5 | -0.123483298 | 0.040511 | 0.002303 | 0.005379 | FES vs HC |
| N-Glycan biosynthesis                                | Glycan Biosynthesis and Metabolism | Metabolism | 6303.29  | 0.480230671  | 0.143741 | 0.000835 | 0.002367 | FES vs HC |
| Other glycan degradation                             | Glycan Biosynthesis and Metabolism | Metabolism | 22149.61 | 0.435410099  | 0.145975 | 0.002857 | 0.006367 | FES vs HC |
| Peptidoglycan biosynthesis                           | Glycan Biosynthesis and Metabolism | Metabolism | 242507.4 | 0.119857706  | 0.032371 | 0.000213 | 0.000766 | FES vs HC |
| alpha-Linolenic acid metabolism                      | Lipid Metabolism                   | Metabolism | 8564.818 | -0.503170063 | 0.100734 | 5.88E-07 | 1.15E-05 | FES vs HC |
| Arachidonic acid metabolism                          | Lipid Metabolism                   | Metabolism | 18392.76 | -0.22756765  | 0.057439 | 7.43E-05 | 0.000345 | FES vs HC |
| Biosynthesis of unsaturated fatty acids              | Lipid Metabolism                   | Metabolism | 66748.87 | -0.305514749 | 0.079285 | 0.000117 | 0.000488 | FES vs HC |

|                                                     |                                      |            |          |              |          |          |          |           |
|-----------------------------------------------------|--------------------------------------|------------|----------|--------------|----------|----------|----------|-----------|
| Fatty acid metabolism                               | Lipid Metabolism                     | Metabolism | 149183.7 | -0.408063095 | 0.086347 | 2.29E-06 | 3.19E-05 | FES vs HC |
| Glycerolipid metabolism                             | Lipid Metabolism                     | Metabolism | 99380.7  | 0.09329859   | 0.020342 | 4.51E-06 | 4.54E-05 | FES vs HC |
| Linoleic acid metabolism                            | Lipid Metabolism                     | Metabolism | 13971.34 | -0.290724403 | 0.119759 | 0.0152   | 0.026577 | FES vs HC |
| Lipid biosynthesis proteins                         | Lipid Metabolism                     | Metabolism | 214732.2 | -0.037480441 | 0.016819 | 0.025854 | 0.042176 | FES vs HC |
| Primary bile acid biosynthesis                      | Lipid Metabolism                     | Metabolism | 3009.205 | -1.025465724 | 0.202628 | 4.17E-07 | 9.49E-06 | FES vs HC |
| Secondary bile acid biosynthesis                    | Lipid Metabolism                     | Metabolism | 900.8071 | -1.004063512 | 0.228232 | 1.09E-05 | 8.13E-05 | FES vs HC |
| Sphingolipid metabolism                             | Lipid Metabolism                     | Metabolism | 17259.74 | 0.405624653  | 0.113566 | 0.000355 | 0.001164 | FES vs HC |
| Steroid biosynthesis                                | Lipid Metabolism                     | Metabolism | 620.1883 | -0.523609779 | 0.225174 | 0.020053 | 0.033847 | FES vs HC |
| Steroid hormone biosynthesis                        | Lipid Metabolism                     | Metabolism | 2182.168 | -0.49139461  | 0.177625 | 0.005667 | 0.011735 | FES vs HC |
| Synthesis and degradation of ketone bodies          | Lipid Metabolism                     | Metabolism | 31949.74 | -0.507812559 | 0.111371 | 5.12E-06 | 4.99E-05 | FES vs HC |
| Lipoic acid metabolism                              | Metabolism of Cofactors and Vitamins | Metabolism | 21487.73 | 0.077125976  | 0.033013 | 0.019481 | 0.033072 | FES vs HC |
| One carbon pool by folate                           | Metabolism of Cofactors and Vitamins | Metabolism | 168040   | 0.092689642  | 0.02468  | 0.000173 | 0.000658 | FES vs HC |
| Pantothenate and CoA biosynthesis                   | Metabolism of Cofactors and Vitamins | Metabolism | 173270.6 | 0.075941346  | 0.023935 | 0.001509 | 0.003977 | FES vs HC |
| Retinol metabolism                                  | Metabolism of Cofactors and Vitamins | Metabolism | 26817.6  | -0.242840718 | 0.060461 | 5.91E-05 | 0.000283 | FES vs HC |
| Riboflavin metabolism                               | Metabolism of Cofactors and Vitamins | Metabolism | 78460.11 | -0.071036608 | 0.019312 | 0.000235 | 0.000816 | FES vs HC |
| Thiamine metabolism                                 | Metabolism of Cofactors and Vitamins | Metabolism | 119074.1 | 0.092204972  | 0.027454 | 0.000784 | 0.002276 | FES vs HC |
| Ubiquinone and other terpenoid-quinone biosynthesis | Metabolism of Cofactors and Vitamins | Metabolism | 89695.59 | -0.154685662 | 0.030622 | 4.39E-07 | 9.49E-06 | FES vs HC |

|                                              |                                          |            |          |              |          |          |          |           |
|----------------------------------------------|------------------------------------------|------------|----------|--------------|----------|----------|----------|-----------|
| beta-Alanine metabolism                      | Metabolism of Other Amino Acids          | Metabolism | 91167.79 | -0.392605986 | 0.084372 | 3.27E-06 | 3.75E-05 | FES vs HC |
| D-Alanine metabolism                         | Metabolism of Other Amino Acids          | Metabolism | 32412.23 | 0.182972324  | 0.044391 | 3.76E-05 | 0.000207 | FES vs HC |
| D-Glutamine and D-glutamate metabolism       | Metabolism of Other Amino Acids          | Metabolism | 43655.84 | 0.068350208  | 0.024134 | 0.004624 | 0.009856 | FES vs HC |
| Glutathione metabolism                       | Metabolism of Other Amino Acids          | Metabolism | 120332   | -0.224796971 | 0.041149 | 4.68E-08 | 2.28E-06 | FES vs HC |
| Selenocompound metabolism                    | Metabolism of Other Amino Acids          | Metabolism | 102507.8 | 0.112098654  | 0.026052 | 1.69E-05 | 0.000107 | FES vs HC |
| Taurine and hypotaurine metabolism           | Metabolism of Other Amino Acids          | Metabolism | 36970.21 | 0.07963222   | 0.025627 | 0.001887 | 0.004555 | FES vs HC |
| Biosynthesis of ansamycins                   | Metabolism of Terpenoids and Polyketides | Metabolism | 17157.81 | 0.168236935  | 0.040935 | 3.96E-05 | 0.00021  | FES vs HC |
| Biosynthesis of vancomycin group antibiotics | Metabolism of Terpenoids and Polyketides | Metabolism | 13780.99 | 0.238567611  | 0.063574 | 0.000175 | 0.000658 | FES vs HC |
| Geraniol degradation                         | Metabolism of Terpenoids and Polyketides | Metabolism | 68869.93 | -0.712095402 | 0.140428 | 3.96E-07 | 9.49E-06 | FES vs HC |
| Limonene and pinene degradation              | Metabolism of Terpenoids and Polyketides | Metabolism | 67942.31 | -0.572319374 | 0.133627 | 1.84E-05 | 0.000112 | FES vs HC |
| Polyketide sugar unit biosynthesis           | Metabolism of Terpenoids and Polyketides | Metabolism | 47869.91 | 0.169518819  | 0.055386 | 0.002208 | 0.0052   | FES vs HC |
| Prenyltransferases                           | Metabolism of Terpenoids and Polyketides | Metabolism | 92747.59 | 0.140045932  | 0.031685 | 9.87E-06 | 7.79E-05 | FES vs HC |
| Terpenoid backbone biosynthesis              | Metabolism of Terpenoids and Polyketides | Metabolism | 160233.7 | 0.108330709  | 0.021992 | 8.4E-07  | 1.53E-05 | FES vs HC |

|                                                 |                                           |            |          |              |          |          |          |           |
|-------------------------------------------------|-------------------------------------------|------------|----------|--------------|----------|----------|----------|-----------|
| Zeatin biosynthesis                             | Metabolism of Terpenoids and Polyketides  | Metabolism | 13395.67 | 0.181893156  | 0.043067 | 2.41E-05 | 0.00014  | FES vs HC |
| Purine metabolism                               | Nucleotide Metabolism                     | Metabolism | 669683   | 0.097191039  | 0.022365 | 1.39E-05 | 9.15E-05 | FES vs HC |
| Pyrimidine metabolism                           | Nucleotide Metabolism                     | Metabolism | 496153.2 | 0.143929084  | 0.03255  | 9.79E-06 | 7.79E-05 | FES vs HC |
| Aminobenzoate degradation                       | Xenobiotics Biodegradation and Metabolism | Metabolism | 80896.95 | -0.313835395 | 0.085392 | 0.000238 | 0.000816 | FES vs HC |
| Atrazine degradation                            | Xenobiotics Biodegradation and Metabolism | Metabolism | 12547.12 | -0.407620849 | 0.135726 | 0.002671 | 0.006    | FES vs HC |
| Benzoate degradation                            | Xenobiotics Biodegradation and Metabolism | Metabolism | 112557.8 | -0.356582537 | 0.096952 | 0.000235 | 0.000816 | FES vs HC |
| Bisphenol degradation                           | Xenobiotics Biodegradation and Metabolism | Metabolism | 22422.37 | -0.324254857 | 0.122745 | 0.008249 | 0.015342 | FES vs HC |
| Caprolactam degradation                         | Xenobiotics Biodegradation and Metabolism | Metabolism | 44218.73 | -0.639283237 | 0.139379 | 4.5E-06  | 4.54E-05 | FES vs HC |
| Chloroalkane and chloroalkene degradation       | Xenobiotics Biodegradation and Metabolism | Metabolism | 60151.2  | -0.260606882 | 0.058564 | 8.59E-06 | 7.17E-05 | FES vs HC |
| Chlorocyclohexane and chlorobenzene degradation | Xenobiotics Biodegradation and Metabolism | Metabolism | 15853.44 | -0.357839154 | 0.13188  | 0.00666  | 0.013321 | FES vs HC |
| Drug metabolism - cytochrome P450               | Xenobiotics Biodegradation and Metabolism | Metabolism | 48775.98 | -0.425397125 | 0.084331 | 4.55E-07 | 9.49E-06 | FES vs HC |
| Drug metabolism - other enzymes                 | Xenobiotics Biodegradation and Metabolism | Metabolism | 74136.79 | 0.206742054  | 0.042826 | 1.38E-06 | 2.24E-05 | FES vs HC |
| Ethylbenzene degradation                        | Xenobiotics Biodegradation and Metabolism | Metabolism | 14173.21 | -0.610894552 | 0.131223 | 3.23E-06 | 3.75E-05 | FES vs HC |
| Fluorobenzoate degradation                      | Xenobiotics Biodegradation and Metabolism | Metabolism | 9283.168 | -0.620760515 | 0.18576  | 0.000833 | 0.002367 | FES vs HC |



|                                                 |                                           |                    |          |              |          |          |          |           |
|-------------------------------------------------|-------------------------------------------|--------------------|----------|--------------|----------|----------|----------|-----------|
| Metabolism of xenobiotics by cytochrome P450    | Xenobiotics Biodegradation and Metabolism | Metabolism         | 46784.02 | -0.430787252 | 0.083094 | 2.17E-07 | 7.91E-06 | FES vs HC |
| Naphthalene degradation                         | Xenobiotics Biodegradation and Metabolism | Metabolism         | 68498.67 | -0.343583176 | 0.075847 | 5.9E-06  | 5.38E-05 | FES vs HC |
| Styrene degradation                             | Xenobiotics Biodegradation and Metabolism | Metabolism         | 19536.43 | -0.345224151 | 0.091811 | 0.00017  | 0.000658 | FES vs HC |
| Cardiac muscle contraction                      | Circulatory System                        | Organismal Systems | 14796.08 | -0.237275984 | 0.106667 | 0.026118 | 0.042369 | FES vs HC |
| Bile secretion                                  | Digestive System                          | Organismal Systems | 168.9367 | -0.714280306 | 0.226635 | 0.001623 | 0.004122 | FES vs HC |
| Mineral absorption                              | Digestive System                          | Organismal Systems | 6858.067 | -0.254013974 | 0.073655 | 0.000563 | 0.00175  | FES vs HC |
| Insulin signaling pathway                       | Endocrine System                          | Organismal Systems | 20968.03 | 0.132472214  | 0.032276 | 4.05E-05 | 0.000211 | FES vs HC |
| PPAR signaling pathway                          | Endocrine System                          | Organismal Systems | 41643.42 | -0.145821934 | 0.059235 | 0.013826 | 0.024618 | FES vs HC |
| Renin-angiotensin system                        | Endocrine System                          | Organismal Systems | 742.9566 | -0.843660802 | 0.214192 | 8.19E-05 | 0.000368 | FES vs HC |
| Circadian rhythm - plant                        | Environmental Adaptation                  | Organismal Systems | 751.2476 | 0.764470687  | 0.193324 | 7.67E-05 | 0.00035  | FES vs HC |
| Cell motility and secretion                     | Cellular Processes and Signaling          | Unclassified       | 69883.89 | -0.126304254 | 0.046111 | 0.00616  | 0.012579 | FES vs HC |
| Electron transfer carriers                      | Cellular Processes and Signaling          | Unclassified       | 6777.965 | 0.433289005  | 0.131601 | 0.000993 | 0.002736 | FES vs HC |
| Germination                                     | Cellular Processes and Signaling          | Unclassified       | 1072.463 | 1.184731816  | 0.199025 | 2.64E-09 | 2.57E-07 | FES vs HC |
| Inorganic ion transport and metabolism          | Cellular Processes and Signaling          | Unclassified       | 97893.62 | -0.20478792  | 0.043649 | 2.71E-06 | 3.6E-05  | FES vs HC |
| Membrane and intracellular structural molecules | Cellular Processes and Signaling          | Unclassified       | 216238.9 | -0.215084998 | 0.037674 | 1.14E-08 | 6.63E-07 | FES vs HC |
| Other ion-coupled transporters                  | Cellular Processes and Signaling          | Unclassified       | 381053.9 | -0.088689553 | 0.026701 | 0.000895 | 0.002513 | FES vs HC |

|                                                          |                                  |                    |          |              |          |          |          |           |
|----------------------------------------------------------|----------------------------------|--------------------|----------|--------------|----------|----------|----------|-----------|
| Other transporters                                       | Cellular Processes and Signaling | Unclassified       | 83332.21 | -0.069240505 | 0.025611 | 0.006861 | 0.013629 | FES vs HC |
| Pores ion channels                                       | Cellular Processes and Signaling | Unclassified       | 186507.8 | -0.184958139 | 0.04982  | 0.000205 | 0.000749 | FES vs HC |
| Signal transduction mechanisms                           | Cellular Processes and Signaling | Unclassified       | 125050.9 | -0.050964648 | 0.020059 | 0.011063 | 0.01994  | FES vs HC |
| Sporulation                                              | Cellular Processes and Signaling | Unclassified       | 16937.76 | 0.903626242  | 0.143307 | 2.87E-10 | 4.19E-08 | FES vs HC |
| Transcription related proteins                           | Genetic Information Processing   | Unclassified       | 1934.966 | -0.572608509 | 0.166433 | 0.000581 | 0.001766 | FES vs HC |
| Translation proteins                                     | Genetic Information Processing   | Unclassified       | 287482   | 0.050893465  | 0.022053 | 0.021009 | 0.035055 | FES vs HC |
| Biosynthesis and biodegradation of secondary metabolites | Metabolism                       | Unclassified       | 19026.4  | -0.230492478 | 0.065835 | 0.000463 | 0.001487 | FES vs HC |
| Carbohydrate metabolism                                  | Metabolism                       | Unclassified       | 26553.63 | 0.246420463  | 0.071388 | 0.000557 | 0.001748 | FES vs HC |
| Energy metabolism                                        | Metabolism                       | Unclassified       | 238612.7 | -0.092802322 | 0.024016 | 0.000111 | 0.000479 | FES vs HC |
| Glycan biosynthesis and metabolism                       | Metabolism                       | Unclassified       | 21335.44 | -0.231990439 | 0.070991 | 0.001084 | 0.002918 | FES vs HC |
| Metabolism of cofactors and vitamins                     | Metabolism                       | Unclassified       | 52373.29 | -0.115234502 | 0.029762 | 0.000108 | 0.000471 | FES vs HC |
| Nucleotide metabolism                                    | Metabolism                       | Unclassified       | 16030.04 | 0.288855448  | 0.097075 | 0.002924 | 0.006469 | FES vs HC |
| Function unknown                                         | Poorly Characterized             | Unclassified       | 531215.1 | -0.136451357 | 0.028816 | 2.19E-06 | 3.19E-05 | FES vs HC |
| General function prediction only                         | Poorly Characterized             | Unclassified       | 967939.5 | -0.042842884 | 0.01589  | 0.007014 | 0.013839 | FES vs HC |
| p53 signaling pathway                                    | Cell Growth and Death            | Cellular Processes | 999.6633 | -1.090656786 | 0.312076 | 0.000474 | 0.003748 | CHR vs HC |
| Bacterial motility proteins                              | Cell Motility                    | Cellular Processes | 351613   | -0.302478406 | 0.10745  | 0.004877 | 0.016425 | CHR vs HC |
| Endocytosis                                              | Transport and Catabolism         | Cellular Processes | 628.2358 | -1.022755914 | 0.370411 | 0.00576  | 0.018381 | CHR vs HC |

|                                       |                                     |                                      |          |              |          |          |          |           |
|---------------------------------------|-------------------------------------|--------------------------------------|----------|--------------|----------|----------|----------|-----------|
| Two-component system                  | Signal Transduction                 | Environmental Information Processing | 470295.8 | -0.262949303 | 0.084721 | 0.001911 | 0.007887 | CHR vs HC |
| Cellular antigens                     | Signaling Molecules and Interaction | Environmental Information Processing | 16626.59 | -0.273190815 | 0.076991 | 0.000388 | 0.003442 | CHR vs HC |
| Ion channels                          | Signaling Molecules and Interaction | Environmental Information Processing | 8646.602 | 0.41431089   | 0.1395   | 0.002978 | 0.01128  | CHR vs HC |
| Protein export                        | Folding                             | Genetic Information Processing       | 185061.4 | 0.133334024  | 0.043021 | 0.00194  | 0.007894 | CHR vs HC |
| RNA degradation                       | Folding                             | Genetic Information Processing       | 134511.8 | 0.071992455  | 0.025266 | 0.00438  | 0.014922 | CHR vs HC |
| Sulfur relay system                   | Folding                             | Genetic Information Processing       | 96362.97 | -0.099495414 | 0.041844 | 0.017417 | 0.043993 | CHR vs HC |
| Chromosome                            | Replication and Repair              | Genetic Information Processing       | 453179.6 | 0.060336851  | 0.024771 | 0.014861 | 0.039228 | CHR vs HC |
| DNA repair and recombination proteins | Replication and Repair              | Genetic Information Processing       | 816777   | 0.103492069  | 0.030458 | 0.000679 | 0.003837 | CHR vs HC |
| DNA replication                       | Replication and Repair              | Genetic Information Processing       | 186409.3 | 0.134577711  | 0.041633 | 0.001227 | 0.005758 | CHR vs HC |
| DNA replication proteins              | Replication and Repair              | Genetic Information Processing       | 327166.9 | 0.113691825  | 0.041042 | 0.005604 | 0.018381 | CHR vs HC |
| Homologous recombination              | Replication and Repair              | Genetic Information Processing       | 264878.7 | 0.143031757  | 0.038741 | 0.000222 | 0.002626 | CHR vs HC |
| Mismatch repair                       | Replication and Repair              | Genetic Information Processing       | 216191.3 | 0.136199429  | 0.039587 | 0.000581 | 0.003748 | CHR vs HC |
| Non-homologous end-joining            | Replication and Repair              | Genetic Information Processing       | 7760.915 | -0.758291632 | 0.174642 | 1.41E-05 | 0.000591 | CHR vs HC |
| Nucleotide excision repair            | Replication and Repair              | Genetic Information Processing       | 101801.7 | 0.156303161  | 0.045194 | 0.000543 | 0.003748 | CHR vs HC |
| RNA polymerase                        | Transcription                       | Genetic Information Processing       | 48507.87 | 0.18384889   | 0.053762 | 0.000627 | 0.003749 | CHR vs HC |
| Aminoacyl-tRNA biosynthesis           | Translation                         | Genetic Information Processing       | 337729.3 | 0.158657336  | 0.048587 | 0.001093 | 0.005521 | CHR vs HC |
| mRNA surveillance pathway             | Translation                         | Genetic Information Processing       | 8.069395 | -3.101870577 | 0.728695 | 2.07E-05 | 0.000675 | CHR vs HC |
| Ribosome                              | Translation                         | Genetic Information Processing       | 656702.4 | 0.179052447  | 0.051784 | 0.000545 | 0.003748 | CHR vs HC |
| Translation factors                   | Translation                         | Genetic Information Processing       | 148416.8 | 0.148268588  | 0.049816 | 0.002917 | 0.011247 | CHR vs HC |
| Colorectal cancer                     | Cancers                             | Human Diseases                       | 975.8788 | -1.083516816 | 0.315193 | 0.000587 | 0.003748 | CHR vs HC |
| Small cell lung cancer                | Cancers                             | Human Diseases                       | 976.4718 | -1.080264304 | 0.315305 | 0.000612 | 0.003748 | CHR vs HC |

|                                                            |                            |                |          |              |          |          |          |           |
|------------------------------------------------------------|----------------------------|----------------|----------|--------------|----------|----------|----------|-----------|
| Hypertrophic cardiomyopathy (HCM)                          | Cardiovascular Diseases    | Human Diseases | 333.9179 | -2.127344345 | 0.330086 | 1.16E-10 | 3.39E-08 | CHR vs HC |
| Viral myocarditis                                          | Cardiovascular Diseases    | Human Diseases | 976.5525 | -1.084783623 | 0.315184 | 0.000578 | 0.003748 | CHR vs HC |
| Primary immunodeficiency                                   | Immune System Diseases     | Human Diseases | 17442.5  | 0.117448821  | 0.048696 | 0.015871 | 0.041152 | CHR vs HC |
| African trypanosomiasis                                    | Infectious Diseases        | Human Diseases | 3540.098 | -0.621961232 | 0.215165 | 0.003845 | 0.013572 | CHR vs HC |
| Bacterial invasion of epithelial cells                     | Infectious Diseases        | Human Diseases | 520.5894 | -0.76017863  | 0.243713 | 0.001814 | 0.007702 | CHR vs HC |
| Chagas disease (American trypanosomiasis)                  | Infectious Diseases        | Human Diseases | 2507.895 | -0.741561521 | 0.205616 | 0.00031  | 0.003096 | CHR vs HC |
| Epithelial cell signaling in Helicobacter pylori infection | Infectious Diseases        | Human Diseases | 18935.53 | 0.242788892  | 0.057818 | 2.68E-05 | 0.000785 | CHR vs HC |
| Influenza A                                                | Infectious Diseases        | Human Diseases | 977.4291 | -1.086268152 | 0.315106 | 0.000566 | 0.003748 | CHR vs HC |
| Shigellosis                                                | Infectious Diseases        | Human Diseases | 71.62971 | -2.629425954 | 0.476856 | 3.51E-08 | 5.14E-06 | CHR vs HC |
| Toxoplasmosis                                              | Infectious Diseases        | Human Diseases | 976.201  | -1.080075945 | 0.315315 | 0.000614 | 0.003748 | CHR vs HC |
| Vibrio cholerae infection                                  | Infectious Diseases        | Human Diseases | 467.8043 | -1.163130707 | 0.31519  | 0.000224 | 0.002626 | CHR vs HC |
| Type I diabetes mellitus                                   | Metabolic Diseases         | Human Diseases | 13192.47 | 0.179090205  | 0.054929 | 0.001112 | 0.005525 | CHR vs HC |
| Type II diabetes mellitus                                  | Metabolic Diseases         | Human Diseases | 12609.09 | 0.275727705  | 0.115689 | 0.017156 | 0.043993 | CHR vs HC |
| Alzheimer's disease                                        | Neurodegenerative Diseases | Human Diseases | 33670.87 | -0.188275822 | 0.069284 | 0.006579 | 0.020505 | CHR vs HC |
| Huntington's disease                                       | Neurodegenerative Diseases | Human Diseases | 32402.29 | -0.282196065 | 0.070305 | 5.97E-05 | 0.001346 | CHR vs HC |
| Parkinson's disease                                        | Neurodegenerative Diseases | Human Diseases | 15897.53 | -0.449105918 | 0.147849 | 0.002385 | 0.009442 | CHR vs HC |
| Prion diseases                                             | Neurodegenerative Diseases | Human Diseases | 3276.948 | -0.451787686 | 0.177881 | 0.011091 | 0.030948 | CHR vs HC |
| Alanine, aspartate and glutamate metabolism                | Amino Acid Metabolism      | Metabolism     | 266092.5 | 0.073321672  | 0.017646 | 3.25E-05 | 0.000866 | CHR vs HC |
| Amino acid related enzymes                                 | Amino Acid Metabolism      | Metabolism     | 422263.5 | 0.121528173  | 0.028225 | 1.66E-05 | 0.00061  | CHR vs HC |

|                                                     |                                             |            |          |              |          |          |          |           |
|-----------------------------------------------------|---------------------------------------------|------------|----------|--------------|----------|----------|----------|-----------|
| Cysteine and methionine metabolism                  | Amino Acid Metabolism                       | Metabolism | 260052.6 | 0.106190477  | 0.027172 | 9.3E-05  | 0.00148  | CHR vs HC |
| Lysine biosynthesis                                 | Amino Acid Metabolism                       | Metabolism | 191671.5 | 0.100457184  | 0.030857 | 0.001132 | 0.005526 | CHR vs HC |
| Lysine degradation                                  | Amino Acid Metabolism                       | Metabolism | 106684.9 | -0.444193502 | 0.141037 | 0.001636 | 0.007059 | CHR vs HC |
| Phenylalanine, tyrosine and tryptophan biosynthesis | Amino Acid Metabolism                       | Metabolism | 227816.7 | 0.132546524  | 0.02707  | 9.76E-07 | 7.15E-05 | CHR vs HC |
| Tryptophan metabolism                               | Amino Acid Metabolism                       | Metabolism | 127252.3 | -0.40777963  | 0.126426 | 0.001258 | 0.005758 | CHR vs HC |
| Valine, leucine and isoleucine degradation          | Amino Acid Metabolism                       | Metabolism | 182441.7 | -0.47786205  | 0.127474 | 0.000178 | 0.002367 | CHR vs HC |
| Indole alkaloid biosynthesis                        | Biosynthesis of Other Secondary Metabolites | Metabolism | 25.56229 | -1.308849144 | 0.404644 | 0.001218 | 0.005758 | CHR vs HC |
| Novobiocin biosynthesis                             | Biosynthesis of Other Secondary Metabolites | Metabolism | 38978.35 | 0.120562983  | 0.035169 | 0.000608 | 0.003748 | CHR vs HC |
| Phenylpropanoid biosynthesis                        | Biosynthesis of Other Secondary Metabolites | Metabolism | 13040.48 | -0.469930639 | 0.151403 | 0.00191  | 0.007887 | CHR vs HC |
| Amino sugar and nucleotide sugar metabolism         | Carbohydrate Metabolism                     | Metabolism | 309087.8 | 0.224306753  | 0.065953 | 0.000671 | 0.003837 | CHR vs HC |
| Butanoate metabolism                                | Carbohydrate Metabolism                     | Metabolism | 255600.4 | -0.158634035 | 0.065023 | 0.014701 | 0.039158 | CHR vs HC |
| C5-Branched dibasic acid metabolism                 | Carbohydrate Metabolism                     | Metabolism | 91841.82 | 0.114598112  | 0.035627 | 0.001297 | 0.005847 | CHR vs HC |
| Fructose and mannose metabolism                     | Carbohydrate Metabolism                     | Metabolism | 173988.6 | 0.225842227  | 0.068651 | 0.001003 | 0.005247 | CHR vs HC |
| Galactose metabolism                                | Carbohydrate Metabolism                     | Metabolism | 120393   | 0.294487697  | 0.108786 | 0.006789 | 0.020938 | CHR vs HC |
| Glyoxylate and dicarboxylate metabolism             | Carbohydrate Metabolism                     | Metabolism | 178314.8 | -0.194534118 | 0.058501 | 0.000883 | 0.004792 | CHR vs HC |
| Pentose phosphate pathway                           | Carbohydrate Metabolism                     | Metabolism | 199735.4 | 0.125629051  | 0.045462 | 0.005721 | 0.018381 | CHR vs HC |

|                                                            |                                    |            |          |              |          |          |          |           |
|------------------------------------------------------------|------------------------------------|------------|----------|--------------|----------|----------|----------|-----------|
| Propanoate metabolism                                      | Carbohydrate Metabolism            | Metabolism | 235665   | -0.221460024 | 0.068641 | 0.001254 | 0.005758 | CHR vs HC |
| Starch and sucrose metabolism                              | Carbohydrate Metabolism            | Metabolism | 164049.8 | 0.227661181  | 0.07672  | 0.003003 | 0.01128  | CHR vs HC |
| Carbon fixation in photosynthetic organisms                | Energy Metabolism                  | Metabolism | 150582.7 | 0.151175004  | 0.043694 | 0.000541 | 0.003748 | CHR vs HC |
| Photosynthesis                                             | Energy Metabolism                  | Metabolism | 98503.9  | 0.182505095  | 0.050792 | 0.000327 | 0.003096 | CHR vs HC |
| Photosynthesis proteins                                    | Energy Metabolism                  | Metabolism | 103507.6 | 0.149566844  | 0.044743 | 0.000829 | 0.004585 | CHR vs HC |
| Protein kinases                                            | Enzyme Families                    | Metabolism | 99492.16 | -0.182021927 | 0.068495 | 0.007874 | 0.023541 | CHR vs HC |
| Glycosaminoglycan degradation                              | Glycan Biosynthesis and Metabolism | Metabolism | 6446.345 | 0.528330329  | 0.227048 | 0.019968 | 0.049164 | CHR vs HC |
| Glycosphingolipid biosynthesis - globo series              | Glycan Biosynthesis and Metabolism | Metabolism | 10470    | 0.533560393  | 0.219604 | 0.015114 | 0.039538 | CHR vs HC |
| Glycosphingolipid biosynthesis - lacto and neolacto series | Glycan Biosynthesis and Metabolism | Metabolism | 10.31518 | -0.980030074 | 0.307939 | 0.00146  | 0.006481 | CHR vs HC |
| Glycosyltransferases                                       | Glycan Biosynthesis and Metabolism | Metabolism | 115816   | 0.156862596  | 0.039943 | 8.6E-05  | 0.00148  | CHR vs HC |
| Peptidoglycan biosynthesis                                 | Glycan Biosynthesis and Metabolism | Metabolism | 237202.6 | 0.117040349  | 0.044335 | 0.008292 | 0.024542 | CHR vs HC |
| alpha-Linolenic acid metabolism                            | Lipid Metabolism                   | Metabolism | 9275.722 | -0.516305412 | 0.147561 | 0.000467 | 0.003748 | CHR vs HC |
| Arachidonic acid metabolism                                | Lipid Metabolism                   | Metabolism | 19419.39 | -0.250967832 | 0.086068 | 0.003546 | 0.012696 | CHR vs HC |
| Biosynthesis of unsaturated fatty acids                    | Lipid Metabolism                   | Metabolism | 72074.06 | -0.301132429 | 0.119166 | 0.011504 | 0.0318   | CHR vs HC |
| Ether lipid metabolism                                     | Lipid Metabolism                   | Metabolism | 2971.507 | -0.702932032 | 0.178657 | 8.34E-05 | 0.00148  | CHR vs HC |
| Fatty acid metabolism                                      | Lipid Metabolism                   | Metabolism | 161288.2 | -0.47124427  | 0.129489 | 0.000273 | 0.002941 | CHR vs HC |
| Sphingolipid metabolism                                    | Lipid Metabolism                   | Metabolism | 16384.07 | 0.483463338  | 0.158647 | 0.002308 | 0.009264 | CHR vs HC |
| Synthesis and degradation of ketone bodies                 | Lipid Metabolism                   | Metabolism | 34891.72 | -0.634663333 | 0.161644 | 8.63E-05 | 0.00148  | CHR vs HC |

|                                              |                                          |            |          |              |          |          |          |           |
|----------------------------------------------|------------------------------------------|------------|----------|--------------|----------|----------|----------|-----------|
| One carbon pool by folate                    | Metabolism of Cofactors and Vitamins     | Metabolism | 167500.1 | 0.130783177  | 0.035824 | 0.000262 | 0.002941 | CHR vs HC |
| Pantothenate and CoA biosynthesis            | Metabolism of Cofactors and Vitamins     | Metabolism | 171798.9 | 0.112452927  | 0.034102 | 0.000975 | 0.005196 | CHR vs HC |
| Porphyrin and chlorophyll metabolism         | Metabolism of Cofactors and Vitamins     | Metabolism | 216449.1 | 0.125240824  | 0.046672 | 0.007287 | 0.02201  | CHR vs HC |
| Retinol metabolism                           | Metabolism of Cofactors and Vitamins     | Metabolism | 27654.28 | -0.251965068 | 0.088419 | 0.004376 | 0.014922 | CHR vs HC |
| Thiamine metabolism                          | Metabolism of Cofactors and Vitamins     | Metabolism | 117691.8 | 0.109806027  | 0.037665 | 0.003553 | 0.012696 | CHR vs HC |
| beta-Alanine metabolism                      | Metabolism of Other Amino Acids          | Metabolism | 100074.2 | -0.354928089 | 0.120133 | 0.003132 | 0.011617 | CHR vs HC |
| D-Alanine metabolism                         | Metabolism of Other Amino Acids          | Metabolism | 31208.1  | 0.151183638  | 0.059936 | 0.011656 | 0.031917 | CHR vs HC |
| D-Glutamine and D-glutamate metabolism       | Metabolism of Other Amino Acids          | Metabolism | 43543.47 | 0.120643983  | 0.035087 | 0.000585 | 0.003748 | CHR vs HC |
| Glutathione metabolism                       | Metabolism of Other Amino Acids          | Metabolism | 125914   | -0.214535658 | 0.055178 | 0.000101 | 0.00148  | CHR vs HC |
| Selenocompound metabolism                    | Metabolism of Other Amino Acids          | Metabolism | 100587.5 | 0.09387508   | 0.036594 | 0.010308 | 0.029322 | CHR vs HC |
| Biosynthesis of ansamycins                   | Metabolism of Terpenoids and Polyketides | Metabolism | 16913.57 | 0.234337243  | 0.059321 | 7.81E-05 | 0.00148  | CHR vs HC |
| Biosynthesis of vancomycin group antibiotics | Metabolism of Terpenoids and Polyketides | Metabolism | 13271.55 | 0.261948163  | 0.105197 | 0.012771 | 0.03433  | CHR vs HC |
| Geraniol degradation                         | Metabolism of Terpenoids and Polyketides | Metabolism | 80047.87 | -0.682027959 | 0.200768 | 0.000681 | 0.003837 | CHR vs HC |

|                                              |                                           |                    |          |              |          |          |          |           |
|----------------------------------------------|-------------------------------------------|--------------------|----------|--------------|----------|----------|----------|-----------|
| Limonene and pinene degradation              | Metabolism of Terpenoids and Polyketides  | Metabolism         | 78073.11 | -0.503952901 | 0.195714 | 0.010025 | 0.028799 | CHR vs HC |
| Prenyltransferases                           | Metabolism of Terpenoids and Polyketides  | Metabolism         | 91214.06 | 0.172777147  | 0.04553  | 0.000148 | 0.002062 | CHR vs HC |
| Terpenoid backbone biosynthesis              | Metabolism of Terpenoids and Polyketides  | Metabolism         | 158599.4 | 0.119563036  | 0.030683 | 9.75E-05 | 0.00148  | CHR vs HC |
| Zeatin biosynthesis                          | Metabolism of Terpenoids and Polyketides  | Metabolism         | 13120.04 | 0.222948716  | 0.062597 | 0.000368 | 0.003374 | CHR vs HC |
| Purine metabolism                            | Nucleotide Metabolism                     | Metabolism         | 661533.5 | 0.114783105  | 0.030809 | 0.000195 | 0.002482 | CHR vs HC |
| Pyrimidine metabolism                        | Nucleotide Metabolism                     | Metabolism         | 485361.5 | 0.168497719  | 0.04639  | 0.000281 | 0.002941 | CHR vs HC |
| Caprolactam degradation                      | Xenobiotics Biodegradation and Metabolism | Metabolism         | 50758.47 | -0.666752535 | 0.203671 | 0.001062 | 0.005457 | CHR vs HC |
| Chloroalkane and chloroalkene degradation    | Xenobiotics Biodegradation and Metabolism | Metabolism         | 63580.22 | -0.259999646 | 0.099877 | 0.009236 | 0.026792 | CHR vs HC |
| Drug metabolism - cytochrome P450            | Xenobiotics Biodegradation and Metabolism | Metabolism         | 52865.43 | -0.4349296   | 0.125031 | 0.000504 | 0.003748 | CHR vs HC |
| Drug metabolism - other enzymes              | Xenobiotics Biodegradation and Metabolism | Metabolism         | 71143.16 | 0.206685519  | 0.057533 | 0.000328 | 0.003096 | CHR vs HC |
| Metabolism of xenobiotics by cytochrome P450 | Xenobiotics Biodegradation and Metabolism | Metabolism         | 50681.19 | -0.441342882 | 0.125187 | 0.000423 | 0.003643 | CHR vs HC |
| Styrene degradation                          | Xenobiotics Biodegradation and Metabolism | Metabolism         | 20732.88 | -0.331173829 | 0.132985 | 0.012763 | 0.03433  | CHR vs HC |
| Cardiac muscle contraction                   | Circulatory System                        | Organismal Systems | 14892.89 | -0.407028522 | 0.148284 | 0.006052 | 0.019068 | CHR vs HC |
| Bile secretion                               | Digestive System                          | Organismal Systems | 164.9374 | -1.434069895 | 0.296473 | 1.32E-06 | 7.72E-05 | CHR vs HC |
| GnRH signaling pathway                       | Endocrine System                          | Organismal Systems | 628.2358 | -1.022755914 | 0.370411 | 0.00576  | 0.018381 | CHR vs HC |
| Insulin signaling pathway                    | Endocrine System                          | Organismal Systems | 20921.34 | 0.212624492  | 0.046493 | 4.8E-06  | 0.000235 | CHR vs HC |



|                                                 |                                  |                                      |          |              |          |          |          |            |
|-------------------------------------------------|----------------------------------|--------------------------------------|----------|--------------|----------|----------|----------|------------|
| PPAR signaling pathway                          | Endocrine System                 | Organismal Systems                   | 42826.6  | -0.210196152 | 0.08838  | 0.017391 | 0.043993 | CHR vs HC  |
| Renin-angiotensin system                        | Endocrine System                 | Organismal Systems                   | 787.4457 | -1.559350805 | 0.305923 | 3.45E-07 | 3.37E-05 | CHR vs HC  |
| Fc gamma R-mediated phagocytosis                | Immune System                    | Organismal Systems                   | 628.2871 | -1.022414599 | 0.370376 | 0.005772 | 0.018381 | CHR vs HC  |
| Germination                                     | Cellular Processes and Signaling | Unclassified                         | 1028.226 | 0.853748103  | 0.324151 | 0.008444 | 0.02474  | CHR vs HC  |
| Membrane and intracellular structural molecules | Cellular Processes and Signaling | Unclassified                         | 228468.8 | -0.130127351 | 0.045649 | 0.004364 | 0.014922 | CHR vs HC  |
| Signal transduction mechanisms                  | Cellular Processes and Signaling | Unclassified                         | 125779.5 | -0.089628421 | 0.028462 | 0.001638 | 0.007059 | CHR vs HC  |
| Sporulation                                     | Cellular Processes and Signaling | Unclassified                         | 14387.41 | 0.896956664  | 0.218908 | 4.18E-05 | 0.00102  | CHR vs HC  |
| Protein folding and associated processing       | Genetic Information Processing   | Unclassified                         | 236661.5 | 0.040991615  | 0.016087 | 0.010832 | 0.030516 | CHR vs HC  |
| Translation proteins                            | Genetic Information Processing   | Unclassified                         | 286551.2 | 0.088213378  | 0.029489 | 0.002777 | 0.010849 | CHR vs HC  |
| Carbohydrate metabolism                         | Metabolism                       | Unclassified                         | 25214.39 | 0.229210345  | 0.098025 | 0.019372 | 0.048103 | CHR vs HC  |
| Energy metabolism                               | Metabolism                       | Unclassified                         | 243993.4 | -0.084330552 | 0.031409 | 0.007255 | 0.02201  | CHR vs HC  |
| Metabolism of cofactors and vitamins            | Metabolism                       | Unclassified                         | 53931.33 | -0.092470766 | 0.03907  | 0.017942 | 0.044933 | CHR vs HC  |
| Nucleotide metabolism                           | Metabolism                       | Unclassified                         | 15364.61 | 0.387591923  | 0.131468 | 0.003196 | 0.011707 | CHR vs HC  |
| MAPK signaling pathway - yeast                  | Signal Transduction              | Environmental Information Processing | 12154.45 | 0.166128227  | 0.049675 | 0.000825 | 0.012536 | FES vs CHR |
| Phosphatidylinositol signaling system           | Signal Transduction              | Environmental Information Processing | 35844.93 | 0.150835009  | 0.051502 | 0.003404 | 0.041269 | FES vs CHR |
| VEGF signaling pathway                          | Signal Transduction              | Environmental Information Processing | 2.390499 | -4.996937173 | 1.746542 | 0.004222 | 0.043883 | FES vs CHR |

|                                                            |                                             |                |          |              |          |          |          |            |
|------------------------------------------------------------|---------------------------------------------|----------------|----------|--------------|----------|----------|----------|------------|
| Bacterial invasion of epithelial cells                     | Infectious Diseases                         | Human Diseases | 488.4277 | 0.710388172  | 0.223304 | 0.001466 | 0.02032  | FES vs CHR |
| Epithelial cell signaling in Helicobacter pylori infection | Infectious Diseases                         | Human Diseases | 18388.83 | -0.156738868 | 0.056512 | 0.005545 | 0.048894 | FES vs CHR |
| Leishmaniasis                                              | Infectious Diseases                         | Human Diseases | 2.390499 | -4.996937173 | 1.746542 | 0.004222 | 0.043883 | FES vs CHR |
| Pertussis                                                  | Infectious Diseases                         | Human Diseases | 9697.254 | -0.870444108 | 0.233923 | 0.000198 | 0.004123 | FES vs CHR |
| Staphylococcus aureus infection                            | Infectious Diseases                         | Human Diseases | 12651.87 | 0.578987005  | 0.204834 | 0.004704 | 0.047206 | FES vs CHR |
| Glycine, serine and threonine metabolism                   | Amino Acid Metabolism                       | Metabolism     | 244869.2 | -0.044178191 | 0.015926 | 0.005537 | 0.048894 | FES vs CHR |
| Histidine metabolism                                       | Amino Acid Metabolism                       | Metabolism     | 145908.4 | -0.154132305 | 0.039551 | 9.74E-05 | 0.00218  | FES vs CHR |
| Betalain biosynthesis                                      | Biosynthesis of Other Secondary Metabolites | Metabolism     | 142.868  | -2.324283576 | 0.444992 | 1.76E-07 | 1.71E-05 | FES vs CHR |
| Isoquinoline alkaloid biosynthesis                         | Biosynthesis of Other Secondary Metabolites | Metabolism     | 16160.42 | -0.284664725 | 0.066504 | 1.87E-05 | 0.000971 | FES vs CHR |
| Novobiocin biosynthesis                                    | Biosynthesis of Other Secondary Metabolites | Metabolism     | 36348.02 | -0.107724219 | 0.030388 | 0.000393 | 0.007143 | FES vs CHR |
| Tropane, piperidine and pyridine alkaloid biosynthesis     | Biosynthesis of Other Secondary Metabolites | Metabolism     | 32401.18 | -0.258287337 | 0.063773 | 5.12E-05 | 0.00149  | FES vs CHR |
| Glyoxylate and dicarboxylate metabolism                    | Carbohydrate Metabolism                     | Metabolism     | 151843.5 | -0.135746393 | 0.049538 | 0.006139 | 0.049499 | FES vs CHR |
| Pyruvate metabolism                                        | Carbohydrate Metabolism                     | Metabolism     | 307447.1 | 0.074287517  | 0.022294 | 0.000862 | 0.012536 | FES vs CHR |
| Nitrogen metabolism                                        | Energy Metabolism                           | Metabolism     | 193001.1 | -0.102288503 | 0.028851 | 0.000392 | 0.007143 | FES vs CHR |
| Cytochrome P450                                            | Enzyme Families                             | Metabolism     | 30.58497 | 2.460731332  | 0.414448 | 2.9E-09  | 4.21E-07 | FES vs CHR |
| Glycosphingolipid biosynthesis - lacto and neolacto series | Glycan Biosynthesis and Metabolism          | Metabolism     | 8.603878 | 1.084054017  | 0.277071 | 9.13E-05 | 0.00218  | FES vs CHR |

|                                                     |                                           |                    |          |              |          |          |          |            |
|-----------------------------------------------------|-------------------------------------------|--------------------|----------|--------------|----------|----------|----------|------------|
| Lipopolysaccharide biosynthesis proteins            | Glycan Biosynthesis and Metabolism        | Metabolism         | 156384.4 | -0.178797857 | 0.059516 | 0.002663 | 0.034638 | FES vs CHR |
| Fatty acid biosynthesis                             | Lipid Metabolism                          | Metabolism         | 153828.2 | 0.064939529  | 0.023353 | 0.005423 | 0.048894 | FES vs CHR |
| Primary bile acid biosynthesis                      | Lipid Metabolism                          | Metabolism         | 2414.473 | -1.083938663 | 0.317477 | 0.00064  | 0.010949 | FES vs CHR |
| Steroid hormone biosynthesis                        | Lipid Metabolism                          | Metabolism         | 2053.516 | -0.737645923 | 0.256042 | 0.003965 | 0.043883 | FES vs CHR |
| Lipoic acid metabolism                              | Metabolism of Cofactors and Vitamins      | Metabolism         | 20031.3  | 0.238135445  | 0.057181 | 3.12E-05 | 0.001135 | FES vs CHR |
| Porphyrin and chlorophyll metabolism                | Metabolism of Cofactors and Vitamins      | Metabolism         | 201248.9 | -0.254680139 | 0.054241 | 2.66E-06 | 0.000194 | FES vs CHR |
| Riboflavin metabolism                               | Metabolism of Cofactors and Vitamins      | Metabolism         | 74194.94 | -0.118989172 | 0.028028 | 2.18E-05 | 0.000971 | FES vs CHR |
| Ubiquinone and other terpenoid-quinone biosynthesis | Metabolism of Cofactors and Vitamins      | Metabolism         | 82744.69 | -0.124344915 | 0.044436 | 0.005137 | 0.048894 | FES vs CHR |
| beta-Alanine metabolism                             | Metabolism of Other Amino Acids           | Metabolism         | 78416.53 | -0.318206926 | 0.116847 | 0.006464 | 0.049499 | FES vs CHR |
| Biosynthesis of type II polyketide products         | Metabolism of Terpenoids and Polyketides  | Metabolism         | 185.5956 | -2.1127369   | 0.499447 | 2.34E-05 | 0.000971 | FES vs CHR |
| Tetracycline biosynthesis                           | Metabolism of Terpenoids and Polyketides  | Metabolism         | 44358.99 | 0.21227003   | 0.052164 | 4.72E-05 | 0.00149  | FES vs CHR |
| Atrazine degradation                                | Xenobiotics Biodegradation and Metabolism | Metabolism         | 11144.49 | -0.548533693 | 0.199249 | 0.005905 | 0.049499 | FES vs CHR |
| Fluorobenzoate degradation                          | Xenobiotics Biodegradation and Metabolism | Metabolism         | 8666.857 | -1.146700593 | 0.285858 | 6.04E-05 | 0.001597 | FES vs CHR |
| Nitrotoluene degradation                            | Xenobiotics Biodegradation and Metabolism | Metabolism         | 14230.71 | -0.262758721 | 0.095649 | 0.006012 | 0.049499 | FES vs CHR |
| Melanogenesis                                       | Endocrine System                          | Organismal Systems | 108.3263 | -3.325476918 | 0.499124 | 2.69E-11 | 7.83E-09 | FES vs CHR |

---

|                                           |                                  |              |          |              |          |          |          |            |
|-------------------------------------------|----------------------------------|--------------|----------|--------------|----------|----------|----------|------------|
| Cell motility and secretion               | Cellular Processes and Signaling | Unclassified | 65616.84 | -0.226066922 | 0.066871 | 0.000723 | 0.011691 | FES vs CHR |
| Other ion-coupled transporters            | Cellular Processes and Signaling | Unclassified | 358555.8 | -0.118413449 | 0.039527 | 0.002738 | 0.034638 | FES vs CHR |
| Protein folding and associated processing | Genetic Information Processing   | Unclassified | 222606.5 | -0.053113828 | 0.019503 | 0.006463 | 0.049499 | FES vs CHR |
| Transcription related proteins            | Genetic Information Processing   | Unclassified | 1678.188 | -0.642385149 | 0.220674 | 0.003603 | 0.041934 | FES vs CHR |

---

## Supplementary Figures

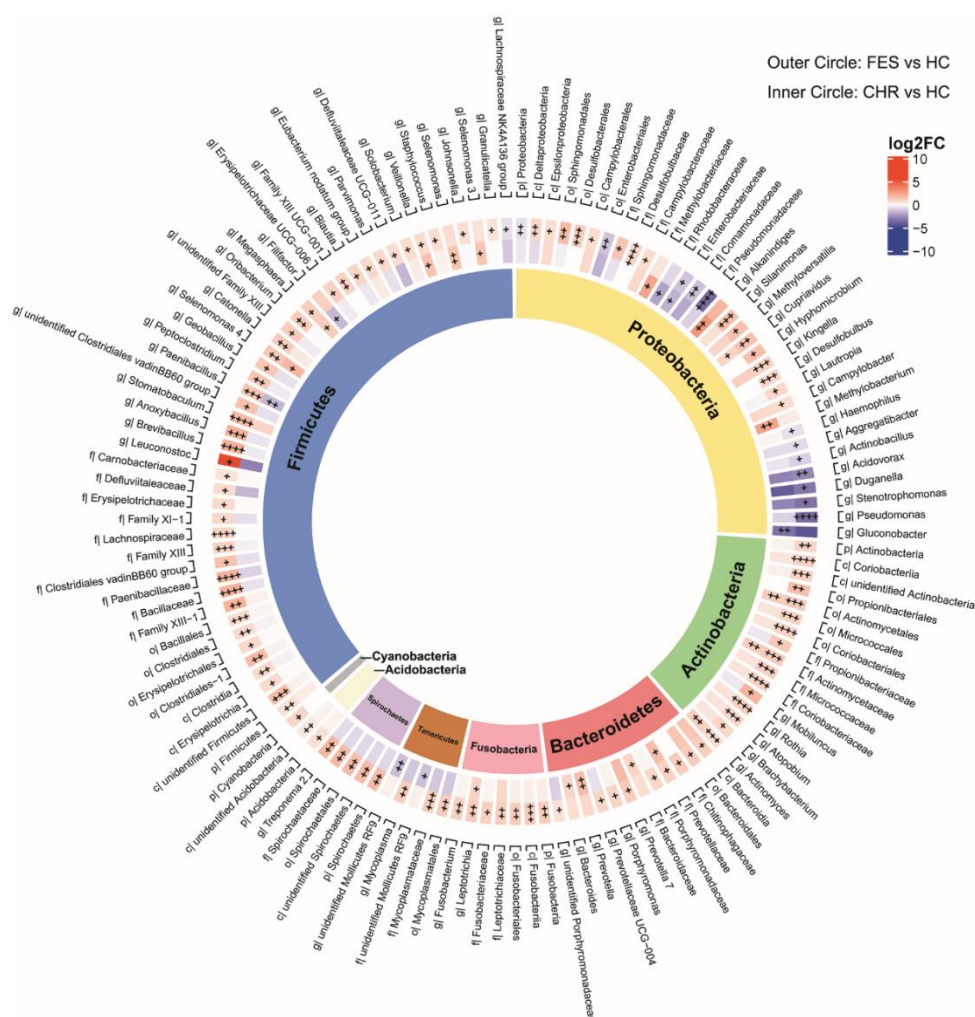

**Supplementary Figure 1.** Drastic alterations in the salivary microbiota were observed in the FES group rather than the CHR group. There were 114 differentially abundant taxa in the FES group relative to HCs and 24 altered taxa in the CHR group compare to HCs, among which ten taxa showing the same trend overlapped between the FES and CHR groups compared to HCs. FES, first-episode schizophrenia; CHR, clinical high risk for psychosis; HCs, healthy controls; p, phylum; c, class; o, order; f, family; g, genus. False discovery rate adjusted  $q$ -values were calculated based on  $p$ -values estimated by quantile regression, adjusting for age, sex and the education level.  $+$   $q < 0.05$ ;  $++$   $q < 0.01$ ;  $+++$   $q < 0.001$ ;  $++++$   $q < 0.0001$ .

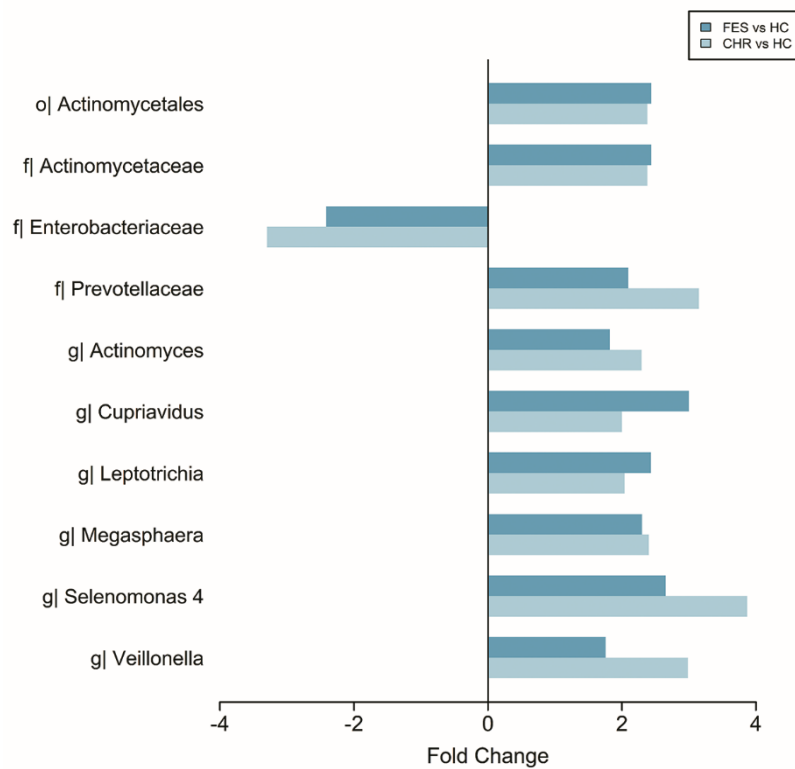

**Supplementary Figure 2.** Overlapping differentially abundant taxa in the FES and CHR groups relative to HCs. The order Actinomycetales, the families Actinomycetaceae and Prevotellaceae, and the genera *Actinomyces*, *Cupriavidus*, *Leptotrichia*, *Megasphaera*, *Selenomonas 4* and *Veillonella* were all enriched in the FES and CHR groups compared to HCs, while the family Enterobacteriaceae depleted. FES, first-episode schizophrenia; CHR, clinical high risk for psychosis; HCs, healthy controls; o, order; f, family; g, genus.

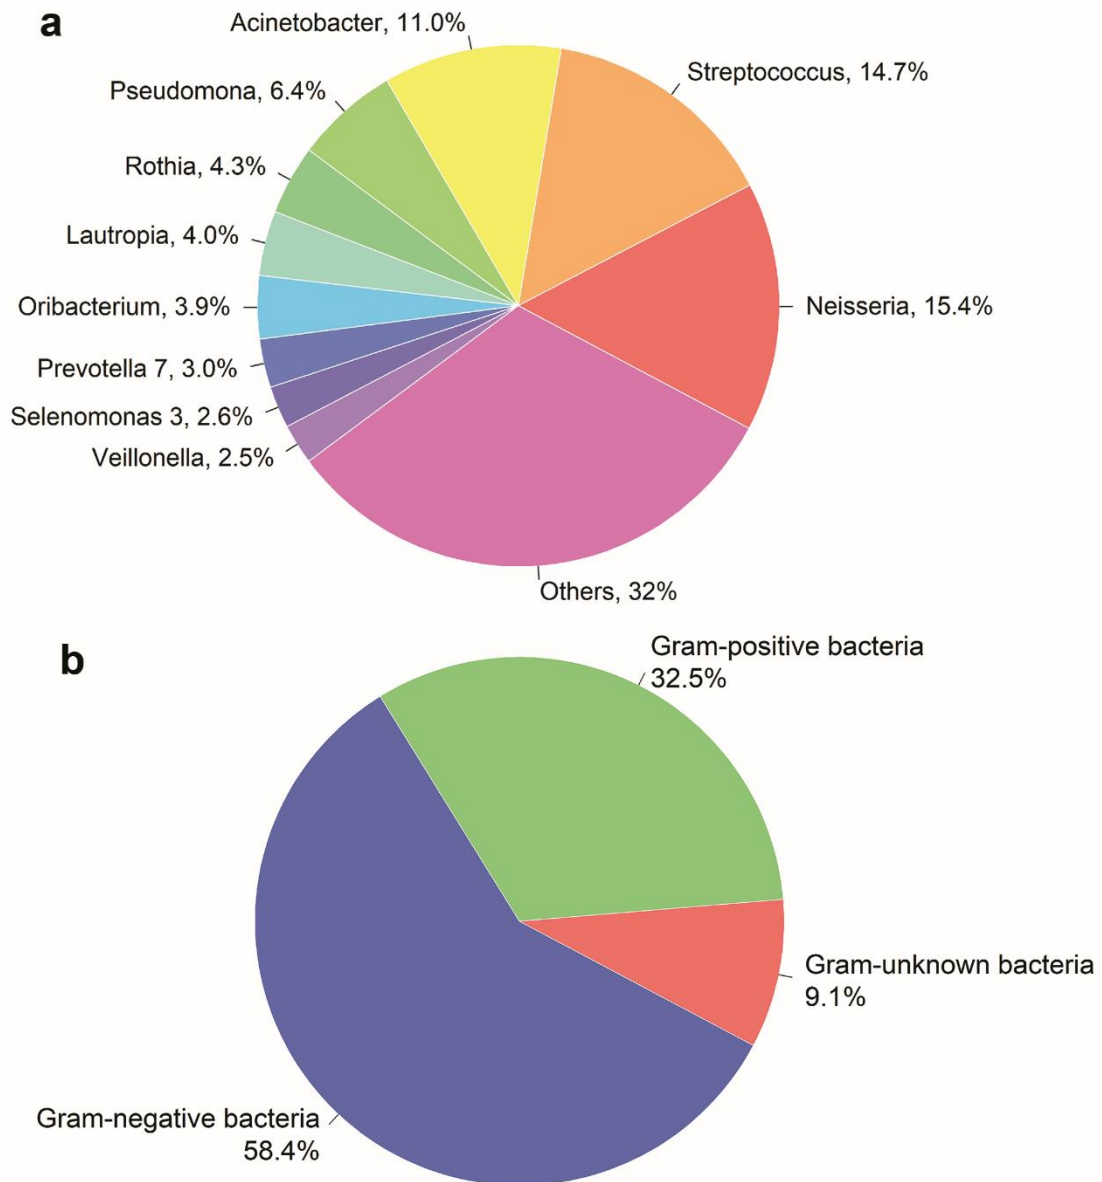

**Supplementary Figure 3.** Dominant genera in saliva. (a) The pie plot shows the 10 most abundant salivary genera in 208 subjects, where *Neisseria*, *Streptococcus* and *Acinetobacter* constituted more than 40% of the bacterial communities in saliva. (b) Relative abundances of gram-positive and gram-negative bacteria in saliva. The pie plot shows that gram-negative bacteria were more abundant than gram-negative bacteria in saliva.

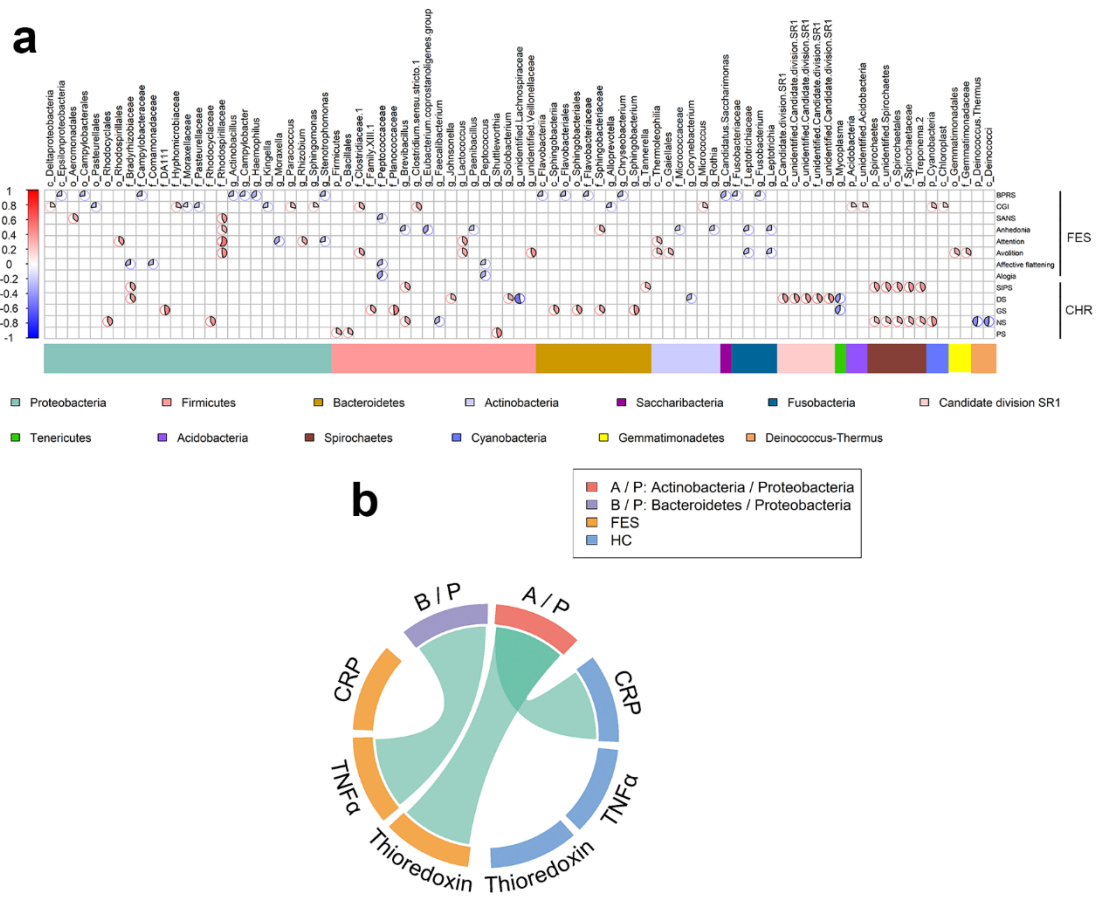

**Supplementary Figure 4. The correlations between salivary taxa and the clinical characteristics of FES and CHR patients. (a) The heatmap shows the relationships between salivary microbiota and symptoms of two disease statuses. Only statistically significant correlations ( $p < 0.05$ ) are shown. Red pies denote positive correlations, while blue pies denote negative correlations. BPRS, brief psychiatric rating scale; CGI-S, clinical global impressions severity scale; SANS, scale for the assessment of negative symptoms; SIPS, structured interview of prodrome syndromes; DS, disorganized symptom; GS, general symptom; NS, negative symptoms; PS, positive symptoms; p, phylum; c, class; o, order; f, family; g, genus. (b) The Bacteroidetes/Proteobacteria ratio was negatively correlated with TNF $\alpha$  in the FES group. The Actinobacteria/Proteobacteria ratio was inversely related to thioredoxin in the FES**



group and negatively associated with CRP in HCs, respectively. Green curves represent negative correlations. A/P, Actinobacteria/Proteobacteria; B/P, Bacteroidetes/Proteobacteria; FES, first-episode schizophrenia; HCs, healthy controls; CRP, C-reactive protein.

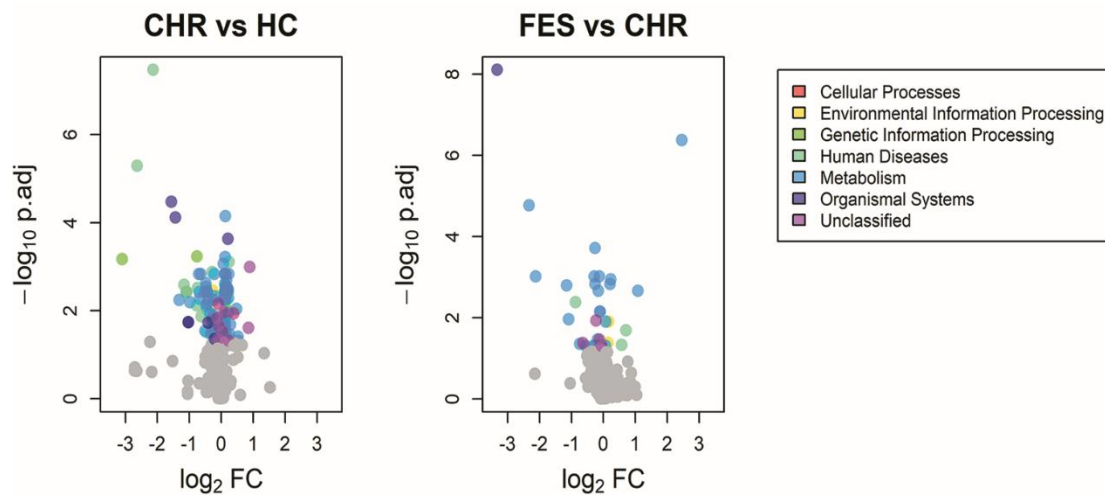

**Supplementary Figure 5.** A set of volcano plots shows the differentially abundant KEGG pathways in CHR vs HC (left) and FES vs CHR (right). KEGG, Kyoto Encyclopedia of Gene and Genomes; FES, first-episode schizophrenia; CHR, clinical high risk for psychosis; HCs, healthy controls; FC, Fold Change.
