# Supplementary material for: Salivary microbiome profiling reveals a dysbiotic schizophrenia-associated microbiota
Source: PubMed Central journal article supplement (PMC8553823; doi:10.1038/s41537-021-00180-1), 2021-10-28
Supplement: 41537_2021_180_MOESM2_ESM.pdf [file 41537_2021_180_MOESM2_ESM.pdf]

## Reporting Summary

Nature Portfolio wishes to improve the reproducibility of the work that we publish. This form provides structure for consistency and transparency in reporting. For further information on Nature Portfolio policies, see our [Editorial Policies](#) and the [Editorial Policy Checklist](#).

### Statistics

For all statistical analyses, confirm that the following items are present in the figure legend, table legend, main text, or Methods section.

n/a Confirmed

- The exact sample size ( $n$ ) for each experimental group/condition, given as a discrete number and unit of measurement
- A statement on whether measurements were taken from distinct samples or whether the same sample was measured repeatedly
- The statistical test(s) used AND whether they are one- or two-sided  
*Only common tests should be described solely by name; describe more complex techniques in the Methods section.*
- A description of all covariates tested
- A description of any assumptions or corrections, such as tests of normality and adjustment for multiple comparisons
- A full description of the statistical parameters including central tendency (e.g. means) or other basic estimates (e.g. regression coefficient) AND variation (e.g. standard deviation) or associated estimates of uncertainty (e.g. confidence intervals)
- For null hypothesis testing, the test statistic (e.g.  $F$ ,  $t$ ,  $r$ ) with confidence intervals, effect sizes, degrees of freedom and  $P$  value noted  
*Give  $P$  values as exact values whenever suitable.*
- For Bayesian analysis, information on the choice of priors and Markov chain Monte Carlo settings
- For hierarchical and complex designs, identification of the appropriate level for tests and full reporting of outcomes
- Estimates of effect sizes (e.g. Cohen's  $d$ , Pearson's  $r$ ), indicating how they were calculated

*Our web collection on [statistics for biologists](#) contains articles on many of the points above.*

### Software and code

Policy information about [availability of computer code](#)

Data collection The signals from the Customized Human Cytokine Antibody Array (RayBiotech, Norcross, GA, USA) were detected using a GenePix 4 000B (Axon Instruments, Foster City, CA, USA).

Data analysis These following softwares were used: GenePix Pro 6.0, FLASH v1.2.7, QIIME v1.7.0, UCHIME v4.2, Uparse v7.0.1001, RDP classifier v2.7, Cytoscape v3.7.2, SPSS v24 and R v3.4.4.

For manuscripts utilizing custom algorithms or software that are central to the research but not yet described in published literature, software must be made available to editors and reviewers. We strongly encourage code deposition in a community repository (e.g. GitHub). See the Nature Portfolio [guidelines for submitting code & software](#) for further information.

### Data

Policy information about [availability of data](#)

All manuscripts must include a [data availability statement](#). This statement should provide the following information, where applicable:

- Accession codes, unique identifiers, or web links for publicly available datasets
- A description of any restrictions on data availability
- For clinical datasets or third party data, please ensure that the statement adheres to our [policy](#)

All sequencing data associated with this study are available in the NCBI SRA database (accession number PRJNA647054).

## Field-specific reporting

Please select the one below that is the best fit for your research. If you are not sure, read the appropriate sections before making your selection.

Life sciences       Behavioural & social sciences       Ecological, evolutionary & environmental sciences

For a reference copy of the document with all sections, see [nature.com/documents/nr-reporting-summary-flat.pdf](https://www.nature.com/documents/nr-reporting-summary-flat.pdf)

## Life sciences study design

All studies must disclose on these points even when the disclosure is negative.

|                 |                                                                                                                                                                                                                                |
|-----------------|--------------------------------------------------------------------------------------------------------------------------------------------------------------------------------------------------------------------------------|
| Sample size     | No sample size calculation was performed. All available samples from participants who met inclusion criteria were included.                                                                                                    |
| Data exclusions | Data that were more than 1.5 IQR below Q1 or more than 1.5 IQR above Q3 in alpha indices and the ratios of taxa were excluded.                                                                                                 |
| Replication     | No replication was performed.                                                                                                                                                                                                  |
| Randomization   | Case control design, no randomization.                                                                                                                                                                                         |
| Blinding        | 16S rRNA gene sequencing in saliva samples and assessment of levels of C-reactive protein, and IFN $\gamma$ , IL-1 $\beta$ , IL-8, TNF $\alpha$ , S100B and L-aspartate in plasma samples were blind to participant diagnosis. |

## Reporting for specific materials, systems and methods

We require information from authors about some types of materials, experimental systems and methods used in many studies. Here, indicate whether each material, system or method listed is relevant to your study. If you are not sure if a list item applies to your research, read the appropriate section before selecting a response.

### Materials & experimental systems

|                                     |                                                                 |
|-------------------------------------|-----------------------------------------------------------------|
| n/a                                 | Involved in the study                                           |
| <input type="checkbox"/>            | <input checked="" type="checkbox"/> Antibodies                  |
| <input checked="" type="checkbox"/> | <input type="checkbox"/> Eukaryotic cell lines                  |
| <input checked="" type="checkbox"/> | <input type="checkbox"/> Palaeontology and archaeology          |
| <input checked="" type="checkbox"/> | <input type="checkbox"/> Animals and other organisms            |
| <input type="checkbox"/>            | <input checked="" type="checkbox"/> Human research participants |
| <input type="checkbox"/>            | <input checked="" type="checkbox"/> Clinical data               |
| <input checked="" type="checkbox"/> | <input type="checkbox"/> Dual use research of concern           |

### Methods

|                                     |                                                 |
|-------------------------------------|-------------------------------------------------|
| n/a                                 | Involved in the study                           |
| <input checked="" type="checkbox"/> | <input type="checkbox"/> ChIP-seq               |
| <input checked="" type="checkbox"/> | <input type="checkbox"/> Flow cytometry         |
| <input checked="" type="checkbox"/> | <input type="checkbox"/> MRI-based neuroimaging |

## Antibodies

|                 |                                                                                      |
|-----------------|--------------------------------------------------------------------------------------|
| Antibodies used | This statement was described in the Methods section.                                 |
| Validation      | The source of antibodies employed in the study were reported in the Methods section. |

## Human research participants

Policy information about [studies involving human research participants](#)

|                            |                                                                                                                                                                                                                                                                                                                                                                                                                                              |
|----------------------------|----------------------------------------------------------------------------------------------------------------------------------------------------------------------------------------------------------------------------------------------------------------------------------------------------------------------------------------------------------------------------------------------------------------------------------------------|
| Population characteristics | Participants included individuals with schizophrenia or schizophreniform disorder confirmed by the Structured Clinical Interview for DSM-IVR, individuals at clinical high-risk for psychosis confirmed by the Structured Interview of Prodrome Syndromes (SIPS), or individuals with no current psychiatric diagnosis as determined by the Structured Clinical Interview for DSM-IVR. Age range was 15-46. Both males and females included. |
| Recruitment                | Patients were recruited from outpatient clinics specializing in psychotic disorders. Comparison participants were recruited through advertisements.                                                                                                                                                                                                                                                                                          |
| Ethics oversight           | Research Ethics Committee at the Shanghai Mental Health Centre                                                                                                                                                                                                                                                                                                                                                                               |

Note that full information on the approval of the study protocol must also be provided in the manuscript.

## Clinical data

---

Policy information about [clinical studies](#)

All manuscripts should comply with the ICMJE [guidelines for publication of clinical research](#) and a completed [CONSORT checklist](#) must be included with all submissions.

|                             |                                                                                                                                                                                                                                                                                                                                                                                          |
|-----------------------------|------------------------------------------------------------------------------------------------------------------------------------------------------------------------------------------------------------------------------------------------------------------------------------------------------------------------------------------------------------------------------------------|
| Clinical trial registration | This was not a clinical trial. It was a case control investigation.                                                                                                                                                                                                                                                                                                                      |
| Study protocol              | Available from the corresponding author upon reasonable request.                                                                                                                                                                                                                                                                                                                         |
| Data collection             | Participants for the current study were recruited between January 2013 and July 2015.                                                                                                                                                                                                                                                                                                    |
| Outcomes                    | The symptomatic severities of patients with schizophrenia were assessed by the Brief Psychiatric Rating Scale (BPRS), Clinical Global Impressions Severity Scale (CGI-S), and Scale for the Assessment of Negative Symptoms (SANS) tests. The symptomatic severities of patients at clinical high-risk for psychosis were assessed by Structured Interview of Prodrome Syndromes (SIPS). |
